# Supplementary material for: Genome-wide dynamics of RNA synthesis, processing, and degradation without RNA metabolic labeling
Source: HighWire-hosted journal article supplement (doi:10.1101/gr.260984.120), 2020-09-25
Supplement: Supplemental_Table_S2.xlsx [file Supplemental_Table_S2.xlsx]

## Sheet: FullClassificationMatrix
Project	Experiment	Cell type annotation	Disease annotation		Genes
ERP002588	ERX298126	B cell, malignant cell	B-cell lymphoma, cancer, diffuse large B-cell lymphoma, leukemia, lymphoma		ENSG00000000457.13
ERP002588	ERX298127	B cell, malignant cell	cancer, leukemia, lymphoma, multiple myeloma		ENSG00000000460.16
ERP002588	ERX298128	B cell, malignant cell	Burkitt lymphoma, cancer, leukemia, lymphoma		ENSG00000000938.12
ERP002588	ERX298129	B cell, malignant cell	cancer, leukemia, lymphoma, mantle cell lymphoma		ENSG00000000971.15
ERP004043	ERX324187	Kidney	kidney cancer, renal carcinoma		ENSG00000001460.17
ERP004043	ERX324191	Kidney	kidney cancer, renal carcinoma		ENSG00000001461.16
ERP004043	ERX324192	Kidney	kidney cancer, renal carcinoma		ENSG00000004455.16
ERP004043	ERX324194	Kidney	Healthy		ENSG00000004487.15
ERP004043	ERX324200	Kidney	kidney cancer, renal carcinoma		ENSG00000006555.10
ERP004043	ERX324205	Kidney	kidney cancer, renal carcinoma		ENSG00000007341.18
ERP004043	ERX324209	Kidney	kidney cancer, renal carcinoma		ENSG00000007908.15
ERP004043	ERX324210	Kidney	kidney cancer, renal carcinoma		ENSG00000007923.15
ERP004043	ERX324213	Kidney	kidney cancer, renal carcinoma		ENSG00000007933.12
ERP004043	ERX324214	Kidney	kidney cancer, renal carcinoma		ENSG00000007968.6
ERP004043	ERX324216	Kidney	kidney cancer, renal carcinoma		ENSG00000008118.9
ERP004043	ERX324221	Kidney	kidney cancer, renal carcinoma		ENSG00000008128.22
ERP004043	ERX324223	Kidney	kidney cancer, renal carcinoma		ENSG00000008130.15
ERP004043	ERX324225	Kidney	kidney cancer, renal carcinoma		ENSG00000009307.15
ERP004043	ERX324227	Kidney	kidney cancer, renal carcinoma		ENSG00000009709.11
ERP004043	ERX324228	Kidney	kidney cancer, renal carcinoma		ENSG00000009724.16
ERP004043	ERX324230	Kidney	kidney cancer, renal carcinoma		ENSG00000009780.15
ERP004043	ERX324231	Kidney	kidney cancer, renal carcinoma		ENSG00000009790.14
ERP004043	ERX324234	Kidney	kidney cancer, renal carcinoma		ENSG00000010072.15
ERP004043	ERX324236	Kidney	kidney cancer, renal carcinoma		ENSG00000010165.19
ERP004043	ERX324238	Kidney	kidney cancer, renal carcinoma		ENSG00000010803.16
ERP004043	ERX324240	Kidney	kidney cancer, renal carcinoma		ENSG00000010932.15
ERP004043	ERX324241	Kidney	kidney cancer, renal carcinoma		ENSG00000011007.12
ERP004043	ERX324244	Kidney	kidney cancer, renal carcinoma		ENSG00000011009.10
ERP004043	ERX324247	Kidney	kidney cancer, renal carcinoma		ENSG00000011021.21
ERP004043	ERX324250	Kidney	kidney cancer, renal carcinoma		ENSG00000014914.19
ERP004043	ERX324251	Kidney	kidney cancer, renal carcinoma		ENSG00000016490.15
ERP004043	ERX324253	Kidney	kidney cancer, renal carcinoma		ENSG00000016602.9
ERP004043	ERX324257	Kidney	kidney cancer, renal carcinoma		ENSG00000018625.14
ERP004043	ERX324262	Kidney	kidney cancer, renal carcinoma		ENSG00000020129.15
ERP004043	ERX324263	Kidney	kidney cancer, renal carcinoma		ENSG00000020633.18
ERP004043	ERX324265	Kidney	kidney cancer, renal carcinoma		ENSG00000021852.12
ERP004043	ERX324266	Kidney	kidney cancer, renal carcinoma		ENSG00000023572.8
ERP004043	ERX324267	Kidney	kidney cancer, renal carcinoma		ENSG00000023902.13
ERP002588	ERX333836	B cell, malignant cell	cancer, leukemia, lymphoma, mantle cell lymphoma		ENSG00000023909.9
ERP002588	ERX333837	B cell, malignant cell	Burkitt lymphoma, cancer, leukemia, lymphoma		ENSG00000024526.16
ERP002588	ERX333838	B cell, malignant cell	B-cell lymphoma, cancer, diffuse large B-cell lymphoma, leukemia, lymphoma		ENSG00000025800.13
ERP004697	ERX386679	Brain	NA		ENSG00000026751.16
ERP004697	ERX386680	Brain	NA		ENSG00000027644.4
ERP004697	ERX386681	Brain	NA		ENSG00000027869.11
ERP004697	ERX386682	Brain	NA		ENSG00000028137.17
ERP004697	ERX386683	Brain	NA		ENSG00000031698.12
ERP004697	ERX386684	Brain	NA		ENSG00000033122.18
ERP004697	ERX386685	Brain	NA		ENSG00000034971.15
ERP004697	ERX386686	Brain	NA		ENSG00000035687.9
ERP005301	ERX425183	Monocyte, CD14+	NA		ENSG00000036549.12
ERP005301	ERX425184	Monocyte, CD14+	NA		ENSG00000037637.10
ERP005301	ERX425185	Monocyte, CD14+	NA		ENSG00000040487.12
ERP005301	ERX425186	Monocyte, CD14+	NA		ENSG00000041988.15
ERP005301	ERX425187	Monocyte, CD14+	NA		ENSG00000042781.12
ERP005301	ERX425188	Monocyte, CD14+	NA		ENSG00000043514.15
ERP005301	ERX425189	Monocyte, CD14+	NA		ENSG00000044012.3
ERP005301	ERX425190	Monocyte, CD14+	NA		ENSG00000047410.13
ERP006823	ERX548385	Pluripotent stem cell	NA		ENSG00000048707.13
ERP006823	ERX548387	Pluripotent stem cell	NA		ENSG00000049089.13
ERP006823	ERX548390	Pluripotent stem cell	NA		ENSG00000049239.12
ERP006823	ERX548393	Pluripotent stem cell	NA		ENSG00000049245.12
ERP006823	ERX548397	Pluripotent stem cell	NA		ENSG00000049246.14
ERP006823	ERX548399	Pluripotent stem cell	NA		ENSG00000049247.13
ERP009514	ERX698004	Hepatocyte	NA		ENSG00000049249.8
ERP009514	ERX698005	Hepatocyte	NA		ENSG00000050628.20
ERP009514	ERX698006	Hepatocyte	NA		ENSG00000052723.11
ERP009514	ERX698007	Hepatocyte	NA		ENSG00000053371.12
ERP009514	ERX698008	Hepatocyte	NA		ENSG00000053372.4
ERP009514	ERX698009	Hepatocyte	NA		ENSG00000054116.11
ERP009514	ERX698010	Hepatocyte	NA		ENSG00000054118.13
ERP009514	ERX698011	Hepatocyte	NA		ENSG00000054267.20
ERP009514	ERX698012	Hepatocyte	NA		ENSG00000054277.13
ERP009514	ERX698013	Hepatocyte	NA		ENSG00000054282.15
ERP009514	ERX698014	Hepatocyte	NA		ENSG00000054392.12
ERP009514	ERX698015	Hepatocyte	NA		ENSG00000054523.17
ERP009514	ERX698016	Hepatocyte	NA		ENSG00000055070.16
ERP009514	ERX698017	Hepatocyte	NA		ENSG00000055732.12
ERP009514	ERX698018	Hepatocyte	NA		ENSG00000057252.12
ERP009514	ERX698019	Hepatocyte	NA		ENSG00000057468.6
ERP009514	ERX698020	Hepatocyte	NA		ENSG00000057757.9
ERP009514	ERX698021	Hepatocyte	NA		ENSG00000058085.14
ERP009514	ERX698022	Hepatocyte	NA		ENSG00000058453.16
ERP009514	ERX698023	Hepatocyte	NA		ENSG00000058668.14
ERP009514	ERX698024	Hepatocyte	NA		ENSG00000058673.15
ERP009514	ERX698025	Hepatocyte	NA		ENSG00000058799.13
ERP009514	ERX698026	Hepatocyte	NA		ENSG00000058804.11
SRP000941	SRX007165	Embryionic stem cells	Healthy		ENSG00000059588.9
SRP057616	SRX1007710	Melanocyte	NA		ENSG00000060642.10
SRP058036	SRX1020484	Stomach	NA		ENSG00000060656.19
SRP058036	SRX1020485	Stomach	NA		ENSG00000060688.12
SRP058036	SRX1020486	Heart	NA		ENSG00000060718.19
SRP058036	SRX1020487	Heart	NA		ENSG00000064703.11
SRP058036	SRX1020488	Lung, malignant cell	NA		ENSG00000064886.13
SRP058036	SRX1020489	Lung, malignant cell	NA		ENSG00000065135.9
SRP058036	SRX1020493	Hepatocyte	NA		ENSG00000065183.15
SRP058036	SRX1020495	Hepatocyte	NA		ENSG00000065243.19
SRP058036	SRX1020496	Kidney	NA		ENSG00000065526.10
SRP058036	SRX1020497	Kidney	NA		ENSG00000065600.12
SRP058036	SRX1020498	Stomach	NA		ENSG00000065978.18
SRP058036	SRX1020499	Stomach	NA		ENSG00000066027.11
SRP058036	SRX1020500	Stomach	NA		ENSG00000066056.13
SRP058036	SRX1020501	Stomach	NA		ENSG00000066135.12
SRP058036	SRX1020502	Stomach	NA		ENSG00000066136.20
SRP058387	SRX1029427	Fibroblasts, lung	NA		ENSG00000066185.12
SRP058387	SRX1029428	Fibroblasts, lung	NA		ENSG00000066279.16
SRP058387	SRX1029429	Fibroblasts, lung	NA		ENSG00000066294.14
SRP058387	SRX1029430	Fibroblasts, lung	NA		ENSG00000066322.13
SRP058387	SRX1029431	Kidney	NA		ENSG00000066557.5
SRP058387	SRX1029432	Kidney	NA		ENSG00000067208.14
SRP058387	SRX1029433	Kidney	NA		ENSG00000067334.13
SRP058387	SRX1029434	Kidney	NA		ENSG00000067533.5
SRP051211	SRX1058796	Adipocyte	NA		ENSG00000067606.16
SRP051211	SRX1058797	Adipocyte	NA		ENSG00000067704.9
SRP051211	SRX1058798	Adipocyte	NA		ENSG00000069248.11
SRP051211	SRX1058799	Adipocyte	NA		ENSG00000069275.12
SRP051211	SRX1058800	Adipocyte	NA		ENSG00000069424.14
SRP051211	SRX1058801	Adipocyte	NA		ENSG00000069702.10
SRP051211	SRX1058802	Adipocyte	NA		ENSG00000069712.11
SRP051211	SRX1058803	Adipocyte	NA		ENSG00000069812.11
SRP059957	SRX1076995	Muscle cell	NA		ENSG00000070759.16
SRP059957	SRX1076996	Muscle cell	NA		ENSG00000070785.16
SRP059957	SRX1076997	Muscle cell	NA		ENSG00000070831.15
SRP059957	SRX1076998	Muscle cell	NA		ENSG00000070886.11
SRP059957	SRX1076999	Muscle cell	Duchenne muscular dystrophy		ENSG00000072694.20
SRP059957	SRX1077000	Muscle cell	Duchenne muscular dystrophy		ENSG00000073754.5
SRP059957	SRX1077001	Muscle cell	Duchenne muscular dystrophy		ENSG00000073756.11
SRP059957	SRX1077002	Muscle cell	Duchenne muscular dystrophy		ENSG00000074800.13
SRP061682	SRX1122068	Neuron	neuronitis		ENSG00000074964.16
SRP061682	SRX1122069	Neuron	neuronitis		ENSG00000075151.20
SRP061682	SRX1122070	Neuron	neuronitis		ENSG00000075391.16
SRP061682	SRX1122091	Neuron	neuronitis		ENSG00000075945.12
SRP061682	SRX1122092	Neuron	neuronitis		ENSG00000076258.9
SRP061682	SRX1122093	Neuron	neuronitis		ENSG00000076321.10
SRP061682	SRX1122094	Neuron	neuronitis		ENSG00000076356.6
SRP061682	SRX1122095	Neuron	neuronitis		ENSG00000076864.19
SRP061682	SRX1122096	Neuron	neuronitis		ENSG00000077152.9
SRP061682	SRX1122097	Neuron	neuronitis		ENSG00000077157.21
SRP061682	SRX1122098	Neuron	neuronitis		ENSG00000077254.14
SRP061682	SRX1122099	Neuron	neuronitis		ENSG00000077522.12
SRP061682	SRX1122100	Neuron	neuronitis		ENSG00000077549.17
SRP061682	SRX1122101	Neuron	neuronitis		ENSG00000077585.13
SRP061682	SRX1122102	Neuron	neuronitis		ENSG00000078369.17
SRP061682	SRX1122103	Neuron	neuronitis		ENSG00000078618.20
SRP061682	SRX1122104	Neuron	neuronitis		ENSG00000078808.16
SRP061682	SRX1122105	Neuron	neuronitis		ENSG00000078900.14
SRP061682	SRX1122106	Neuron	neuronitis		ENSG00000079277.19
SRP061682	SRX1122107	Neuron	neuronitis		ENSG00000079335.18
SRP061682	SRX1122108	Neuron	neuronitis		ENSG00000079739.15
SRP061682	SRX1122109	Neuron	neuronitis		ENSG00000080910.11
SRP062188	SRX1137247	Breast	NA		ENSG00000081019.13
SRP062188	SRX1137248	Breast	NA		ENSG00000081026.18
SRP062188	SRX1137249	Breast	NA		ENSG00000081237.18
SRP062188	SRX1137250	Breast	adenocarcinoma		ENSG00000081248.10
SRP062188	SRX1137251	Breast	adenocarcinoma		ENSG00000081277.12
SRP062188	SRX1137252	Breast	adenocarcinoma		ENSG00000081692.12
SRP062444	SRX1152941	T cell	NA		ENSG00000081721.11
SRP063573	SRX1220981	Melanocyte	NA		ENSG00000081870.11
SRP063573	SRX1220982	Melanocyte	NA		ENSG00000081985.10
SRP063573	SRX1220983	Melanocyte	NA		ENSG00000082482.13
SRP064264	SRX1295185	Neuron	neuronitis		ENSG00000082497.11
SRP064264	SRX1295188	Neuron	neuronitis		ENSG00000082512.14
SRP064264	SRX1295212	Neuron	neuronitis		ENSG00000083444.16
SRP064264	SRX1295225	Neuron	neuronitis		ENSG00000084070.11
SRP064264	SRX1295320	Neuron	neuronitis		ENSG00000084072.16
SRP064264	SRX1295336	Neuron	neuronitis		ENSG00000084073.8
SRP064264	SRX1295342	Neuron	neuronitis		ENSG00000084623.11
SRP064264	SRX1295353	Neuron	neuronitis		ENSG00000084628.9
SRP064264	SRX1295758	Neuron	neuronitis		ENSG00000084636.17
SRP064264	SRX1295759	Neuron	neuronitis		ENSG00000084652.15
SRP064264	SRX1295760	Neuron	neuronitis		ENSG00000085433.15
SRP064264	SRX1295761	Neuron	neuronitis		ENSG00000085465.12
SRP064264	SRX1295765	Neuron	neuronitis		ENSG00000085491.15
SRP064264	SRX1295778	Neuron	neuronitis		ENSG00000085552.16
SRP064264	SRX1295779	Neuron	neuronitis		ENSG00000085831.15
SRP064264	SRX1295782	Neuron	neuronitis		ENSG00000085832.16
SRP064264	SRX1295786	Neuron	neuronitis		ENSG00000085840.12
SRP064264	SRX1295787	Neuron	neuronitis		ENSG00000085998.13
SRP064264	SRX1295788	Neuron	neuronitis		ENSG00000085999.11
SRP064264	SRX1295790	Neuron	neuronitis		ENSG00000086015.20
SRP064264	SRX1295791	Neuron	neuronitis		ENSG00000086619.13
SRP064264	SRX1295800	Neuron	neuronitis		ENSG00000088035.15
SRP064264	SRX1295801	Neuron	neuronitis		ENSG00000088280.18
SRP064264	SRX1295802	Neuron	neuronitis		ENSG00000090020.10
SRP064264	SRX1295803	Neuron	neuronitis		ENSG00000090104.11
SRP064264	SRX1295804	Neuron	neuronitis		ENSG00000090273.13
SRP064264	SRX1295805	Neuron	neuronitis		ENSG00000090432.6
SRP064264	SRX1295806	Neuron	neuronitis		ENSG00000090621.13
SRP064264	SRX1295807	Neuron	neuronitis		ENSG00000090686.15
SRP064264	SRX1295808	Neuron	neuronitis		ENSG00000091483.6
SRP064264	SRX1295809	Neuron	neuronitis		ENSG00000092607.13
SRP065022	SRX1356474	T cell	NA		ENSG00000092621.11
SRP065022	SRX1356478	B cell	NA		ENSG00000092847.11
SRP056637	SRX1396667	Keratinocyte	NA		ENSG00000092850.11
SRP056637	SRX1396668	Keratinocyte	NA		ENSG00000092853.13
SRP056637	SRX1396669	Keratinocyte	NA		ENSG00000092969.11
SRP056637	SRX1396670	Keratinocyte	NA		ENSG00000092978.10
SRP056637	SRX1396671	Keratinocyte	NA		ENSG00000094963.13
SRP056637	SRX1396672	Keratinocyte	NA		ENSG00000094975.13
SRP066009	SRX1426193	Brain	NA		ENSG00000097021.19
SRP066009	SRX1426194	Brain	NA		ENSG00000097033.14
SRP066009	SRX1426197	Brain	NA		ENSG00000097046.12
SRP066150	SRX1430653	B cell	NA		ENSG00000097096.8
SRP066150	SRX1430654	B cell	NA		ENSG00000099260.10
SRP066150	SRX1430655	B cell	NA		ENSG00000107404.18
SRP066150	SRX1430656	B cell	NA		ENSG00000116128.10
SRP066150	SRX1430657	B cell	NA		ENSG00000116132.11
SRP066150	SRX1430658	B cell	NA		ENSG00000116133.11
SRP066150	SRX1430659	B cell	NA		ENSG00000116138.12
SRP066150	SRX1430660	B cell	NA		ENSG00000116141.15
SRP066150	SRX1430661	B cell	NA		ENSG00000116147.16
SRP066895	SRX1458628	Malignant cell	colorectal cancer		ENSG00000116151.13
SRP066895	SRX1458629	Malignant cell	colorectal cancer		ENSG00000116157.5
SRP066895	SRX1458630	Malignant cell	colorectal cancer		ENSG00000116161.17
SRP066895	SRX1458631	Malignant cell	colorectal cancer		ENSG00000116171.16
SRP066895	SRX1458632	Malignant cell	colorectal cancer		ENSG00000116183.10
SRP066895	SRX1458633	Malignant cell	colorectal cancer		ENSG00000116191.17
SRP066895	SRX1458634	Malignant cell	colorectal cancer		ENSG00000116194.12
SRP066895	SRX1458635	Malignant cell	colorectal cancer		ENSG00000116198.12
SRP066895	SRX1458636	Malignant cell	colorectal cancer		ENSG00000116199.11
SRP066895	SRX1458637	Malignant cell	colorectal cancer		ENSG00000116205.11
SRP066895	SRX1458638	Malignant cell	colorectal cancer		ENSG00000116209.11
SRP066895	SRX1458639	Malignant cell	colorectal cancer		ENSG00000116212.14
SRP066895	SRX1458640	Malignant cell	colorectal cancer		ENSG00000116213.15
SRP066895	SRX1458641	Malignant cell	colorectal cancer		ENSG00000116218.12
SRP066895	SRX1458642	Malignant cell	colorectal cancer		ENSG00000116221.15
SRP066895	SRX1458643	Malignant cell	colorectal cancer		ENSG00000116237.15
SRP066895	SRX1458644	Malignant cell	colorectal cancer		ENSG00000116251.9
SRP068078	SRX1516574	Muscle cell	NA		ENSG00000116254.17
SRP068078	SRX1516575	Muscle cell	NA		ENSG00000116260.16
SRP068942	SRX1548246	Mesenchimal stem cells/2	NA		ENSG00000116266.10
SRP068942	SRX1548247	Mesenchimal stem cells/2	NA		ENSG00000116273.5
SRP068942	SRX1548248	Mesenchimal stem cells/2	NA		ENSG00000116285.12
SRP068942	SRX1548249	Mesenchimal stem cells/2	NA		ENSG00000116288.12
SRP068942	SRX1548250	Mesenchimal stem cells/2	NA		ENSG00000116299.16
SRP068942	SRX1548251	Mesenchimal stem cells/2	NA		ENSG00000116329.10
SRP068942	SRX1548252	Mesenchimal stem cells/2	NA		ENSG00000116337.15
SRP068942	SRX1548253	Mesenchimal stem cells/2	NA		ENSG00000116350.16
SRP068942	SRX1548254	Mesenchimal stem cells/2	NA		ENSG00000116353.15
SRP068942	SRX1548255	Mesenchimal stem cells/2	NA		ENSG00000116396.14
SRP068942	SRX1548256	Mesenchimal stem cells/2	NA		ENSG00000116406.18
SRP068942	SRX1548257	Mesenchimal stem cells/2	NA		ENSG00000116455.13
SRP068942	SRX1548258	Mesenchimal stem cells/2	NA		ENSG00000116459.10
SRP068942	SRX1548259	Mesenchimal stem cells/2	NA		ENSG00000116473.14
SRP068942	SRX1548260	Mesenchimal stem cells/2	NA		ENSG00000116478.11
SRP068942	SRX1548261	Mesenchimal stem cells/2	NA		ENSG00000116489.12
SRP068942	SRX1548262	Mesenchimal stem cells/2	NA		ENSG00000116497.17
SRP068942	SRX1548263	Mesenchimal stem cells/2	NA		ENSG00000116514.16
SRP019503	SRX247357	Kidney	NA		ENSG00000116521.10
SRP019503	SRX250144	Kidney	NA		ENSG00000116525.13
SRP019503	SRX250147	Kidney	NA		ENSG00000116539.11
SRP026208	SRX312124	Heart	NA		ENSG00000116544.11
SRP026208	SRX312125	Heart	NA		ENSG00000116560.10
SRP026208	SRX312126	Heart	NA		ENSG00000116574.5
SRP026208	SRX312127	Heart	NA		ENSG00000116580.18
SRP026208	SRX312128	Heart	NA		ENSG00000116584.17
SRP026208	SRX312129	Heart	NA		ENSG00000116586.11
SRP026208	SRX312130	Heart	NA		ENSG00000116604.17
SRP026208	SRX312131	Heart	NA		ENSG00000116641.17
SRP026208	SRX312132	Heart	NA		ENSG00000116649.9
SRP026208	SRX312133	Heart	NA		ENSG00000116661.9
SRP026208	SRX312134	Heart	NA		ENSG00000116663.10
SRP026208	SRX312135	Heart	NA		ENSG00000116667.12
SRP026208	SRX312136	Heart	NA		ENSG00000116668.12
SRP026208	SRX312137	Heart	NA		ENSG00000116670.14
SRP026208	SRX312138	Heart	NA		ENSG00000116675.15
SRP026208	SRX312140	Heart	cardiomyopathy		ENSG00000116678.18
SRP026208	SRX312141	Heart	cardiomyopathy		ENSG00000116679.15
SRP026208	SRX312142	Heart	cardiomyopathy		ENSG00000116685.15
SRP026208	SRX312143	Heart	cardiomyopathy		ENSG00000116688.16
SRP026208	SRX312144	Heart	cardiomyopathy		ENSG00000116690.12
SRP026208	SRX312145	Heart	cardiomyopathy		ENSG00000116691.10
SRP026208	SRX312146	Heart	cardiomyopathy		ENSG00000116698.20
SRP026208	SRX312147	Heart	cardiomyopathy		ENSG00000116701.14
SRP026208	SRX312148	Heart	cardiomyopathy		ENSG00000116703.13
SRP026208	SRX312149	Heart	cardiomyopathy		ENSG00000116704.7
SRP026208	SRX312150	Heart	cardiomyopathy		ENSG00000116711.9
SRP026208	SRX312151	Heart	cardiomyopathy		ENSG00000116717.11
SRP026208	SRX312152	Heart	cardiomyopathy		ENSG00000116721.9
SRP026208	SRX312153	Heart	cardiomyopathy		ENSG00000116726.4
SRP026208	SRX312154	Heart	cardiomyopathy		ENSG00000116729.13
SRP029990	SRX352331	Immune system	NA		ENSG00000116731.22
SRP029990	SRX352332	Immune system	NA		ENSG00000116741.7
SRP029990	SRX352333	Immune system	NA		ENSG00000116745.6
SRP029990	SRX352334	Immune system	NA		ENSG00000116747.12
SRP029990	SRX352335	Immune system	NA		ENSG00000116748.20
SRP029990	SRX352336	Immune system	NA		ENSG00000116750.13
SRP029990	SRX352337	Immune system	NA		ENSG00000116752.5
SRP029990	SRX352338	Immune system	NA		ENSG00000116754.13
SRP029990	SRX352339	Immune system	NA		ENSG00000116761.11
SRP029990	SRX352340	Immune system	NA		ENSG00000116771.5
SRP029990	SRX352341	Immune system	NA		ENSG00000116774.11
SRP029990	SRX352342	Immune system	NA		ENSG00000116783.14
SRP031620	SRX365666	Malignant cell	cervical cancer		ENSG00000116785.13
SRP031620	SRX365667	Malignant cell	cervical cancer		ENSG00000116786.11
SRP031620	SRX365668	Malignant cell	cervical cancer		ENSG00000116791.13
SRP031620	SRX365669	Malignant cell	cervical cancer		ENSG00000116793.15
SRP031620	SRX365670	Malignant cell	cervical cancer		ENSG00000116809.11
SRP031620	SRX365671	Malignant cell	cervical cancer		ENSG00000116815.15
SRP031620	SRX365673	Malignant cell	cervical cancer		ENSG00000116819.6
SRP031620	SRX365674	Malignant cell	cervical cancer		ENSG00000116824.4
SRP031620	SRX365675	Malignant cell	cervical cancer		ENSG00000116830.11
SRP031620	SRX365676	Malignant cell	cervical cancer		ENSG00000116833.13
SRP031620	SRX365677	Malignant cell	cervical cancer		ENSG00000116852.14
SRP031620	SRX365678	Malignant cell	cervical cancer		ENSG00000116857.16
SRP031620	SRX365679	Malignant cell	cervical cancer		ENSG00000116863.10
SRP031620	SRX365680	Malignant cell	cervical cancer		ENSG00000116871.15
SRP033282	SRX382664	Breast, malignant cell	breast cancer		ENSG00000116874.11
SRP033282	SRX382665	Breast, malignant cell	breast cancer		ENSG00000116882.14
SRP033282	SRX382666	Breast, malignant cell	breast cancer		ENSG00000116885.18
SRP033282	SRX382667	Breast, malignant cell	breast cancer		ENSG00000116898.11
SRP033282	SRX382668	Breast, malignant cell	breast cancer		ENSG00000116906.11
SRP033282	SRX382669	Breast, malignant cell	breast cancer		ENSG00000116918.13
SRP033282	SRX382670	Breast, malignant cell	breast cancer		ENSG00000116922.14
SRP033282	SRX382671	Breast, malignant cell	breast cancer		ENSG00000116954.7
SRP033282	SRX382672	Breast, malignant cell	breast cancer		ENSG00000116957.12
SRP035316	SRX424932	T cell	NA		ENSG00000116962.14
SRP035316	SRX424933	T cell	NA		ENSG00000116977.18
SRP035316	SRX424934	T cell	NA		ENSG00000116981.3
SRP035316	SRX424935	T cell	NA		ENSG00000116983.12
SRP035316	SRX424936	T cell	NA		ENSG00000116984.12
SRP035316	SRX424937	T cell	NA		ENSG00000116985.11
SRP035316	SRX424938	T cell	NA		ENSG00000116990.10
SRP035316	SRX424939	T cell	NA		ENSG00000116991.10
SRP035316	SRX424940	T cell	NA		ENSG00000116996.9
SRP035316	SRX424941	T cell	NA		ENSG00000117000.8
SRP035419	SRX433215	Malignant cell	cervical cancer		ENSG00000117009.11
SRP035419	SRX433216	Malignant cell	cervical cancer		ENSG00000117010.15
SRP035419	SRX433217	Malignant cell	cervical cancer		ENSG00000117013.14
SRP035419	SRX433218	Malignant cell	cervical cancer		ENSG00000117016.9
SRP037550	SRX469062	Fibroblasts, lung	NA		ENSG00000117020.16
SRP037550	SRX469063	Fibroblasts, lung	NA		ENSG00000117036.11
SRP037550	SRX469064	Fibroblasts, lung	NA		ENSG00000117054.13
SRP037550	SRX469065	Fibroblasts, lung	NA		ENSG00000117069.14
SRP037550	SRX469066	Fibroblasts, lung	NA		ENSG00000117090.14
SRP037550	SRX469067	Fibroblasts, lung	NA		ENSG00000117091.9
SRP037553	SRX469106	Keratinocyte	scleroderma, systemic scleroderma		ENSG00000117114.19
SRP037553	SRX469403	Keratinocyte	scleroderma, systemic scleroderma		ENSG00000117115.12
SRP037553	SRX469404	Keratinocyte	scleroderma, systemic scleroderma		ENSG00000117118.9
SRP037553	SRX470006	Keratinocyte	scleroderma, systemic scleroderma		ENSG00000117122.13
SRP037553	SRX470018	Keratinocyte	scleroderma, systemic scleroderma		ENSG00000117133.10
SRP037553	SRX470019	Keratinocyte	scleroderma, systemic scleroderma		ENSG00000117139.16
SRP037553	SRX470021	Keratinocyte	scleroderma, systemic scleroderma		ENSG00000117143.13
SRP037553	SRX470022	Keratinocyte	scleroderma, systemic scleroderma		ENSG00000117148.7
SRP037762	SRX470241	Embryionic stem cells	NA		ENSG00000117151.12
SRP037762	SRX470242	Embryionic stem cells	NA		ENSG00000117152.13
SRP037762	SRX470243	Embryionic stem cells	NA		ENSG00000117153.15
SRP037762	SRX470244	Embryionic stem cells	NA		ENSG00000117154.11
SRP037762	SRX470245	Embryionic stem cells	NA		ENSG00000117155.16
SRP040806	SRX507487	Immune system	cancer		ENSG00000117174.10
SRP040806	SRX507794	Immune system	cancer		ENSG00000117215.14
SRP040806	SRX507795	Immune system	cancer		ENSG00000117222.13
SRP040806	SRX507796	Immune system	cancer		ENSG00000117226.11
SRP040806	SRX507797	Immune system	cancer		ENSG00000117228.9
SRP040806	SRX507798	Immune system	cancer		ENSG00000117245.12
SRP041008	SRX512381	Pluripotent stem cell	NA		ENSG00000117262.18
SRP041008	SRX512382	Pluripotent stem cell	NA		ENSG00000117266.15
SRP041008	SRX512383	Pluripotent stem cell	NA		ENSG00000117280.12
SRP041008	SRX512384	Pluripotent stem cell	NA		ENSG00000117281.15
SRP041008	SRX512385	Pluripotent stem cell	NA		ENSG00000117298.14
SRP041008	SRX512386	Pluripotent stem cell	NA		ENSG00000117305.14
SRP041008	SRX512387	Pluripotent stem cell	NA		ENSG00000117308.14
SRP041008	SRX512388	Pluripotent stem cell	NA		ENSG00000117318.8
SRP041228	SRX518816	Kidney	NA		ENSG00000117322.16
SRP042630	SRX560109	B cell	NA		ENSG00000117335.19
SRP042630	SRX560110	B cell	NA		ENSG00000117360.12
SRP042630	SRX560111	B cell	NA		ENSG00000117362.12
SRP042630	SRX560112	B cell	NA		ENSG00000117385.15
SRP043364	SRX610269	Brain	NA		ENSG00000117394.19
SRP043364	SRX610270	Brain	NA		ENSG00000117395.11
SRP043364	SRX610271	Brain	NA		ENSG00000117399.13
SRP043364	SRX610272	Brain	NA		ENSG00000117400.15
SRP043364	SRX610273	Brain	NA		ENSG00000117407.16
SRP043364	SRX610274	Brain	NA		ENSG00000117408.10
SRP043364	SRX610275	Brain	NA		ENSG00000117410.13
SRP043364	SRX610276	Brain	NA		ENSG00000117411.16
SRP043364	SRX610277	Brain	NA		ENSG00000117419.14
SRP043364	SRX610278	Brain	NA		ENSG00000117425.13
SRP043364	SRX610279	Brain	NA		ENSG00000117448.13
SRP043364	SRX610280	Brain	NA		ENSG00000117450.13
SRP043364	SRX610281	Brain	NA		ENSG00000117461.14
SRP043364	SRX610282	Brain	NA		ENSG00000117472.9
SRP043364	SRX610283	Brain	NA		ENSG00000117475.13
SRP043364	SRX610284	Brain	NA		ENSG00000117477.12
SRP043364	SRX610285	Brain	NA		ENSG00000117479.12
SRP043364	SRX610286	Brain	NA		ENSG00000117480.15
SRP043364	SRX610287	Brain	NA		ENSG00000117481.10
SRP043364	SRX610288	Brain	NA		ENSG00000117500.12
SRP043364	SRX610289	Brain	NA		ENSG00000117501.14
SRP043364	SRX610290	Brain	NA		ENSG00000117505.12
SRP043364	SRX610291	Brain	NA		ENSG00000117519.15
SRP043364	SRX610292	Brain	NA		ENSG00000117523.15
SRP043364	SRX610293	Brain	NA		ENSG00000117525.13
SRP043364	SRX610294	Brain	NA		ENSG00000117528.11
SRP043364	SRX610295	Brain	NA		ENSG00000117533.14
SRP043364	SRX610296	Brain	NA		ENSG00000117543.20
SRP043364	SRX610297	Brain	NA		ENSG00000117560.7
SRP043364	SRX610298	Brain	NA		ENSG00000117569.18
SRP043364	SRX610299	Brain	NA		ENSG00000117586.10
SRP043364	SRX610300	Brain	NA		ENSG00000117592.8
SRP043364	SRX610301	Brain	NA		ENSG00000117593.9
SRP043364	SRX610303	Brain	NA		ENSG00000117594.9
SRP043364	SRX610304	Brain	NA		ENSG00000117595.10
SRP043364	SRX610305	Brain	NA		ENSG00000117597.17
SRP043364	SRX610306	Brain	NA		ENSG00000117598.11
SRP043364	SRX610307	Brain	NA		ENSG00000117600.12
SRP043364	SRX610308	Brain	NA		ENSG00000117601.13
SRP043364	SRX610309	Brain	NA		ENSG00000117602.11
SRP043364	SRX610310	Brain	NA		ENSG00000117614.9
SRP043364	SRX610311	Brain	NA		ENSG00000117616.17
SRP043364	SRX610312	Brain	NA		ENSG00000117620.13
SRP043364	SRX610313	Brain	NA		ENSG00000117625.13
SRP043364	SRX610314	Brain	NA		ENSG00000117632.21
SRP043364	SRX610315	Brain	NA		ENSG00000117640.17
SRP043364	SRX610316	Brain	NA		ENSG00000117643.14
SRP043364	SRX610317	Brain	NA		ENSG00000117650.12
SRP043364	SRX610319	Brain	NA		ENSG00000117676.13
SRP043364	SRX610320	Brain	NA		ENSG00000117682.16
SRP044679	SRX658145	Malignant cell	cervical cancer		ENSG00000117691.9
SRP044679	SRX658146	Malignant cell	cervical cancer		ENSG00000117697.14
SRP044679	SRX658147	Malignant cell	cervical cancer		ENSG00000117707.15
SRP044679	SRX658148	Malignant cell	cervical cancer		ENSG00000117713.18
SRP044679	SRX658149	Malignant cell	cervical cancer		ENSG00000117724.12
SRP044679	SRX658150	Malignant cell	cervical cancer		ENSG00000117748.9
SRP044679	SRX658151	Malignant cell	cervical cancer		ENSG00000117751.17
SRP044679	SRX658152	Malignant cell	cervical cancer		ENSG00000117758.13
SRP044756	SRX660093	Adipose derived stem cells	NA		ENSG00000117791.15
SRP044756	SRX660094	Adipose derived stem cells	NA		ENSG00000117834.12
SRP044756	SRX660095	Adipose derived stem cells	NA		ENSG00000117859.18
SRP044756	SRX660096	Adipose derived stem cells	NA		ENSG00000117862.11
SRP044756	SRX660097	Adipose derived stem cells	NA		ENSG00000118193.11
SRP044756	SRX660098	Adipose derived stem cells	NA		ENSG00000118194.18
SRP044756	SRX660099	Adipose derived stem cells	NA		ENSG00000118197.13
SRP044756	SRX660100	Adipose derived stem cells	NA		ENSG00000118200.14
SRP044756	SRX660101	Adipose derived stem cells	NA		ENSG00000118217.5
SRP044756	SRX660102	Adipose derived stem cells	NA		ENSG00000118292.8
SRP044756	SRX660103	Adipose derived stem cells	NA		ENSG00000118298.10
SRP044756	SRX660104	Adipose derived stem cells	NA		ENSG00000118454.12
SRP044925	SRX663211	Keratinocyte	NA		ENSG00000118473.21
SRP044925	SRX663212	Keratinocyte	NA		ENSG00000118655.4
SRP044925	SRX663213	Keratinocyte	NA		ENSG00000118729.11
SRP044925	SRX663214	Keratinocyte	NA		ENSG00000118733.16
SRP044925	SRX663215	Keratinocyte	NA		ENSG00000118873.15
SRP044925	SRX663216	Keratinocyte	NA		ENSG00000119280.16
SRP044925	SRX663217	Keratinocyte	NA		ENSG00000119283.15
SRP044925	SRX663218	Keratinocyte	NA		ENSG00000119285.10
SRP045318	SRX671551	Embryionic stem cells	NA		ENSG00000119535.17
SRP045318	SRX671552	Embryionic stem cells	NA		ENSG00000120332.15
SRP045318	SRX671553	Embryionic stem cells	NA		ENSG00000120333.4
SRP045322	SRX671583	Breast, malignant cell	breast cancer, carcinoma		ENSG00000120334.15
SRP045322	SRX671584	Breast, malignant cell	breast cancer, carcinoma		ENSG00000120337.8
SRP045322	SRX671585	Breast, malignant cell	breast cancer, carcinoma		ENSG00000120341.18
SRP045322	SRX671586	Breast, malignant cell	breast cancer, carcinoma		ENSG00000120370.12
SRP045322	SRX671587	Breast, malignant cell	breast cancer, carcinoma		ENSG00000120656.11
SRP045322	SRX671588	Breast, malignant cell	breast cancer, carcinoma		ENSG00000120937.8
SRP045406	SRX673854	Hepatocyte	alcohol dependence, substance abuse		ENSG00000120942.13
SRP045545	SRX682087	Adipocyte	NA		ENSG00000120948.15
SRP045545	SRX682088	Adipocyte	NA		ENSG00000120949.14
SRP045545	SRX682089	Adipocyte	NA		ENSG00000120952.4
SRP045545	SRX682090	Adipocyte	NA		ENSG00000121310.16
SRP045545	SRX682091	Adipocyte	NA		ENSG00000121446.18
SRP045545	SRX682092	Adipocyte	NA		ENSG00000121454.5
SRP045406	SRX689197	Hepatocyte	alcohol dependence, substance abuse		ENSG00000121481.10
SRP045406	SRX689198	Hepatocyte	alcohol dependence, substance abuse		ENSG00000121486.11
SRP045406	SRX689199	Hepatocyte	alcohol dependence, substance abuse		ENSG00000121644.18
SRP045406	SRX689200	Hepatocyte	alcohol dependence, substance abuse		ENSG00000121753.12
SRP045406	SRX689201	Hepatocyte	alcohol dependence, substance abuse		ENSG00000121766.15
SRP045406	SRX689202	Hepatocyte	alcohol dependence, substance abuse		ENSG00000121769.7
SRP045406	SRX689203	Hepatocyte	alcohol dependence, substance abuse		ENSG00000121774.17
SRP045590	SRX689768	Brain	NA		ENSG00000121775.17
SRP045900	SRX690027	Brain	multiple sclerosis		ENSG00000121851.12
SRP045900	SRX690028	Brain	multiple sclerosis		ENSG00000121900.18
SRP045900	SRX690029	Brain	multiple sclerosis		ENSG00000121903.14
SRP045590	SRX690241	Brain	NA		ENSG00000121904.17
SRP045590	SRX690242	Brain	NA		ENSG00000121905.9
SRP045590	SRX690243	Brain	NA		ENSG00000121931.15
SRP045590	SRX690244	Brain	NA		ENSG00000121933.18
SRP045590	SRX690245	Brain	NA		ENSG00000121940.15
SRP045590	SRX690246	Brain	NA		ENSG00000121957.12
SRP045986	SRX690800	Immune system	NA		ENSG00000122176.10
SRP045986	SRX690864	Immune system	NA		ENSG00000122180.4
SRP045986	SRX690921	Immune system	NA		ENSG00000122188.12
SRP045986	SRX690932	Immune system	NA		ENSG00000122218.14
SRP045986	SRX690933	Immune system	NA		ENSG00000122223.12
SRP045986	SRX690934	Immune system	NA		ENSG00000122224.17
SRP044679	SRX712885	Malignant cell	cervical cancer		ENSG00000122406.12
SRP044679	SRX712886	Malignant cell	cervical cancer		ENSG00000122417.15
SRP044679	SRX712887	Malignant cell	cervical cancer		ENSG00000122420.9
SRP044679	SRX712888	Malignant cell	cervical cancer		ENSG00000122435.9
SRP044679	SRX712889	Malignant cell	cervical cancer		ENSG00000122477.12
SRP044679	SRX712890	Malignant cell	cervical cancer		ENSG00000122481.16
SRP044679	SRX712891	Malignant cell	cervical cancer		ENSG00000122482.20
SRP044679	SRX712892	Malignant cell	cervical cancer		ENSG00000122483.17
SRP048577	SRX718684	Melanocyte	NA		ENSG00000122484.8
SRP048577	SRX718685	Melanocyte	NA		ENSG00000123080.10
SRP048577	SRX718686	Melanocyte	NA		ENSG00000123091.4
SRP048577	SRX718687	Melanocyte	NA		ENSG00000123472.12
SRP048577	SRX718688	Melanocyte	NA		ENSG00000123473.15
SRP048577	SRX718689	Melanocyte	NA		ENSG00000123684.12
SRP048577	SRX718690	Melanocyte	NA		ENSG00000123685.8
SRP048577	SRX718691	Melanocyte	NA		ENSG00000123689.5
SRP048577	SRX718692	Melanocyte	NA		ENSG00000123836.14
SRP048683	SRX725593	Brain	autism spectrum disorder		ENSG00000123838.10
SRP048683	SRX725594	Brain	autism spectrum disorder		ENSG00000123843.12
SRP048683	SRX725595	Brain	NA		ENSG00000125459.14
SRP048683	SRX725596	Brain	NA		ENSG00000125462.16
SRP048683	SRX725597	Brain	NA		ENSG00000125703.14
SRP048683	SRX725598	Brain	NA		ENSG00000125944.18
SRP048683	SRX725599	Brain	autism spectrum disorder		ENSG00000125945.14
SRP048683	SRX725600	Brain	NA		ENSG00000126067.11
SRP048683	SRX725601	Brain	NA		ENSG00000126070.19
SRP048683	SRX725602	Brain	autism spectrum disorder		ENSG00000126088.13
SRP048683	SRX725603	Brain	autism spectrum disorder		ENSG00000126091.19
SRP048683	SRX725604	Brain	autism spectrum disorder		ENSG00000126106.13
SRP048820	SRX730599	B cell	follicular lymphoma		ENSG00000126107.14
SRP048820	SRX730600	B cell	follicular lymphoma		ENSG00000126698.10
SRP048820	SRX730601	B cell	follicular lymphoma		ENSG00000126705.13
SRP048820	SRX730602	B cell	follicular lymphoma		ENSG00000126709.14
SRP048820	SRX730603	B cell	follicular lymphoma		ENSG00000127054.19
SRP048820	SRX730604	B cell	follicular lymphoma		ENSG00000127074.14
SRP048820	SRX730605	B cell	follicular lymphoma		ENSG00000127124.14
SRP048820	SRX730606	B cell	follicular lymphoma		ENSG00000127125.8
SRP048820	SRX730607	B cell	follicular lymphoma		ENSG00000127129.9
SRP048820	SRX730608	B cell	follicular lymphoma		ENSG00000127423.10
SRP048820	SRX730609	B cell	tonsillitis		ENSG00000127463.13
SRP048820	SRX730610	B cell	tonsillitis		ENSG00000127472.10
SRP048820	SRX730611	B cell	NA		ENSG00000127481.14
SRP048820	SRX730612	B cell	NA		ENSG00000127483.17
SRP049156	SRX738247	Malignant cell	NA		ENSG00000127603.23
SRP049156	SRX738248	Malignant cell	NA		ENSG00000130695.13
SRP049156	SRX738249	Malignant cell	NA		ENSG00000130762.14
SRP049156	SRX738250	Malignant cell	NA		ENSG00000130764.9
SRP049156	SRX738251	Malignant cell	NA		ENSG00000130766.4
SRP049355	SRX745845	Breast, malignant cell	breast cancer		ENSG00000130768.14
SRP049355	SRX745846	Breast, malignant cell	breast cancer		ENSG00000130770.17
SRP049355	SRX745847	Breast, malignant cell	breast cancer		ENSG00000130772.13
SRP049355	SRX745848	Breast, malignant cell	breast cancer		ENSG00000130775.15
SRP049355	SRX745849	Breast, malignant cell	breast cancer		ENSG00000130939.18
SRP049355	SRX745850	Breast, malignant cell	breast cancer		ENSG00000130940.14
SRP049355	SRX745851	Breast, malignant cell	breast cancer		ENSG00000131233.9
SRP049355	SRX745852	Breast, malignant cell	breast cancer		ENSG00000131236.16
SRP049355	SRX745853	Breast, malignant cell	breast cancer		ENSG00000131238.16
SRP049355	SRX745854	Breast, malignant cell	breast cancer		ENSG00000131584.18
SRP050089	SRX764798	Brain	NA		ENSG00000131591.17
SRP050089	SRX764799	Brain	NA		ENSG00000131686.14
SRP050089	SRX764800	Brain	NA		ENSG00000131697.17
SRP051182	SRX810721	Lung, malignant cell	NA		ENSG00000131778.17
SRP051182	SRX810722	Lung, malignant cell	NA		ENSG00000131779.10
SRP051182	SRX810723	Lung, malignant cell	NA		ENSG00000131781.12
SRP051182	SRX810724	Lung, malignant cell	NA		ENSG00000131788.15
SRP051182	SRX810725	Lung, malignant cell	NA		ENSG00000131791.7
SRP051182	SRX810726	Lung, malignant cell	NA		ENSG00000131910.4
SRP051182	SRX810727	Lung, malignant cell	NA		ENSG00000131914.10
SRP051182	SRX810728	Lung, malignant cell	NA		ENSG00000132122.11
SRP051182	SRX810729	Lung, malignant cell	NA		ENSG00000132128.16
SRP051182	SRX810730	Lung, malignant cell	NA		ENSG00000132185.16
SRP051182	SRX810731	Lung, malignant cell	NA		ENSG00000132196.13
SRP051182	SRX810732	Lung, malignant cell	NA		ENSG00000132485.13
SRP051182	SRX810733	Lung, malignant cell	NA		ENSG00000132676.15
SRP051182	SRX810734	Lung, malignant cell	NA		ENSG00000132677.12
SRP051182	SRX810735	Lung, malignant cell	NA		ENSG00000132680.10
SRP051182	SRX810736	Lung, malignant cell	NA		ENSG00000132681.16
SRP051182	SRX810737	Lung, malignant cell	NA		ENSG00000132688.10
SRP051182	SRX810738	Lung, malignant cell	NA		ENSG00000132692.18
SRP051182	SRX810739	Lung, malignant cell	NA		ENSG00000132693.12
SRP051182	SRX810740	Lung, malignant cell	NA		ENSG00000132694.18
SRP051182	SRX810741	Lung, malignant cell	NA		ENSG00000132698.14
SRP051211	SRX813780	Adipocyte	NA		ENSG00000132702.12
SRP051211	SRX813781	Adipocyte	NA		ENSG00000132703.3
SRP051211	SRX813782	Adipocyte	NA		ENSG00000132704.15
SRP051211	SRX813783	Adipocyte	NA		ENSG00000132716.18
SRP051211	SRX813784	Adipocyte	NA		ENSG00000132718.8
SRP051211	SRX813785	Adipocyte	NA		ENSG00000132763.14
SRP051211	SRX813786	Adipocyte	NA		ENSG00000132768.13
SRP051211	SRX813787	Adipocyte	NA		ENSG00000132773.11
SRP051211	SRX813788	Adipocyte	NA		ENSG00000132780.16
SRP051211	SRX813789	Adipocyte	NA		ENSG00000132781.17
SRP051211	SRX813790	Adipocyte	NA		ENSG00000132849.19
SRP051211	SRX813791	Adipocyte	NA		ENSG00000132854.18
SRP053043	SRX863072	Neuron	neuronitis		ENSG00000132855.4
SRP053043	SRX863073	Neuron	neuronitis		ENSG00000132879.13
SRP053043	SRX863074	Neuron	neuronitis		ENSG00000132881.11
SRP053043	SRX863075	Neuron	neuronitis		ENSG00000132906.17
SRP054971	SRX876039	Breast	NA		ENSG00000133019.11
SRP054971	SRX876040	Breast	NA		ENSG00000133048.12
SRP054971	SRX876041	Breast	NA		ENSG00000133055.8
SRP054971	SRX876042	Breast	NA		ENSG00000133056.13
SRP054971	SRX876043	Breast	NA		ENSG00000133059.16
SRP054971	SRX876044	Breast	NA		ENSG00000133063.15
SRP054971	SRX876045	Breast	NA		ENSG00000133065.10
SRP055153	SRX883481	Fibroblasts, skin	NA		ENSG00000133067.17
SRP055153	SRX883482	Lung, malignant cell	lung carcinoma		ENSG00000133069.15
SRP055916	SRX906150	Monocyte, CD14+	NA		ENSG00000133216.16
SRP056604	SRX970047	Hippocampus	NA		ENSG00000133226.16
SRP056604	SRX970048	Hippocampus	NA		ENSG00000134183.11
SRP056604	SRX970049	Hippocampus	NA		ENSG00000134184.12
SRP056604	SRX970050	Hippocampus	NA		ENSG00000134186.11
SRP056604	SRX970051	Hippocampus	NA		ENSG00000134193.14
SRP056604	SRX970052	Hippocampus	NA		ENSG00000134198.9
SRP056604	SRX970053	Hippocampus	NA		ENSG00000134200.3
SRP056604	SRX970054	Hippocampus	NA		ENSG00000134201.10
SRP057074	SRX986789	Fibroblasts, skin	NA		ENSG00000134202.10
SRP057074	SRX986790	Fibroblasts, skin	NA		ENSG00000134207.14
SRP057074	SRX986791	Fibroblasts, skin	NA		ENSG00000134215.15
SRP057074	SRX986792	Fibroblasts, skin	NA		ENSG00000134216.18
SRP057074	SRX986793	Fibroblasts, skin	NA		ENSG00000134222.16
SRP057074	SRX986794	Fibroblasts, skin	NA		ENSG00000134240.11
SRP057074	SRX986795	Fibroblasts, skin	NA		ENSG00000134242.15
SRP057074	SRX986796	Fibroblasts, skin	NA		ENSG00000134243.11
SRP057074	SRX986797	Malignant cell	ovarian cancer		ENSG00000134245.17
SRP057074	SRX986798	Malignant cell	ovarian cancer		ENSG00000134247.9
SRP057074	SRX986799	Malignant cell	ovarian cancer		ENSG00000134248.13
SRP057074	SRX986800	Malignant cell	ovarian cancer		ENSG00000134250.18
SRP057074	SRX986801	Malignant cell	ovarian cancer		ENSG00000134253.9
SRP057074	SRX986802	Malignant cell	ovarian cancer		ENSG00000134255.13
SRP057074	SRX986803	Malignant cell	ovarian cancer		ENSG00000134256.12
SRP057074	SRX986804	Malignant cell	ovarian cancer		ENSG00000134258.16
SRP057074	SRX986805	Malignant cell	ovarian cancer		ENSG00000134259.3
SRP057074	SRX986806	Malignant cell	ovarian cancer		ENSG00000134262.12
SRP057074	SRX986807	Malignant cell	ovarian cancer		ENSG00000134365.12
SRP057074	SRX986808	Malignant cell	ovarian cancer		ENSG00000134369.15
					ENSG00000134371.10
					ENSG00000134375.10
					ENSG00000134376.14
					ENSG00000134389.9
					ENSG00000134644.15
					ENSG00000134668.12
					ENSG00000134684.10
					ENSG00000134686.17
					ENSG00000134690.10
					ENSG00000134697.12
					ENSG00000134698.10
					ENSG00000134709.10
					ENSG00000134716.9
					ENSG00000134717.17
					ENSG00000134744.13
					ENSG00000134748.12
					ENSG00000135744.7
					ENSG00000135747.11
					ENSG00000135749.18
					ENSG00000135750.14
					ENSG00000135763.9
					ENSG00000135766.8
					ENSG00000135773.12
					ENSG00000135775.13
					ENSG00000135776.4
					ENSG00000135778.11
					ENSG00000135801.9
					ENSG00000135821.17
					ENSG00000135823.13
					ENSG00000135824.12
					ENSG00000135828.11
					ENSG00000135829.16
					ENSG00000135835.10
					ENSG00000135837.15
					ENSG00000135838.13
					ENSG00000135842.16
					ENSG00000135845.9
					ENSG00000135862.5
					ENSG00000135870.11
					ENSG00000136628.17
					ENSG00000136631.12
					ENSG00000136634.5
					ENSG00000136636.12
					ENSG00000136643.11
					ENSG00000137936.16
					ENSG00000137941.16
					ENSG00000137942.16
					ENSG00000137944.16
					ENSG00000137947.11
					ENSG00000137948.18
					ENSG00000137955.15
					ENSG00000137959.15
					ENSG00000137960.5
					ENSG00000137962.12
					ENSG00000137965.10
					ENSG00000137968.16
					ENSG00000137975.7
					ENSG00000137976.7
					ENSG00000137992.14
					ENSG00000137996.12
					ENSG00000142224.15
					ENSG00000142583.17
					ENSG00000142599.17
					ENSG00000142606.15
					ENSG00000142609.17
					ENSG00000142611.16
					ENSG00000142615.7
					ENSG00000142619.4
					ENSG00000142621.19
					ENSG00000142623.9
					ENSG00000142627.12
					ENSG00000142632.16
					ENSG00000142634.12
					ENSG00000142655.12
					ENSG00000142657.20
					ENSG00000142661.18
					ENSG00000142669.14
					ENSG00000142675.17
					ENSG00000142676.12
					ENSG00000142677.3
					ENSG00000142684.8
					ENSG00000142686.7
					ENSG00000142687.17
					ENSG00000142694.6
					ENSG00000142698.14
					ENSG00000142700.11
					ENSG00000142733.14
					ENSG00000142748.12
					ENSG00000142751.14
					ENSG00000142765.17
					ENSG00000142784.15
					ENSG00000142789.19
					ENSG00000142794.18
					ENSG00000142798.17
					ENSG00000142856.16
					ENSG00000142864.14
					ENSG00000142867.12
					ENSG00000142871.16
					ENSG00000142875.19
					ENSG00000142892.14
					ENSG00000142910.15
					ENSG00000142920.16
					ENSG00000142937.11
					ENSG00000142945.12
					ENSG00000142949.16
					ENSG00000142959.4
					ENSG00000142961.14
					ENSG00000142973.12
					ENSG00000143001.4
					ENSG00000143006.7
					ENSG00000143013.12
					ENSG00000143028.8
					ENSG00000143032.7
					ENSG00000143033.17
					ENSG00000143036.16
					ENSG00000143061.17
					ENSG00000143067.4
					ENSG00000143079.14
					ENSG00000143093.14
					ENSG00000143106.12
					ENSG00000143107.8
					ENSG00000143110.11
					ENSG00000143119.12
					ENSG00000143125.5
					ENSG00000143126.7
					ENSG00000143127.12
					ENSG00000143147.14
					ENSG00000143149.12
					ENSG00000143153.12
					ENSG00000143155.12
					ENSG00000143156.13
					ENSG00000143157.11
					ENSG00000143158.10
					ENSG00000143162.7
					ENSG00000143164.15
					ENSG00000143167.11
					ENSG00000143171.12
					ENSG00000143178.12
					ENSG00000143179.13
					ENSG00000143183.16
					ENSG00000143184.4
					ENSG00000143185.3
					ENSG00000143190.21
					ENSG00000143194.12
					ENSG00000143195.12
					ENSG00000143196.4
					ENSG00000143198.12
					ENSG00000143199.17
					ENSG00000143207.19
					ENSG00000143217.8
					ENSG00000143222.11
					ENSG00000143224.17
					ENSG00000143226.13
					ENSG00000143228.12
					ENSG00000143248.12
					ENSG00000143252.14
					ENSG00000143256.4
					ENSG00000143257.11
					ENSG00000143258.15
					ENSG00000143278.3
					ENSG00000143294.14
					ENSG00000143297.18
					ENSG00000143303.11
					ENSG00000143314.12
					ENSG00000143318.12
					ENSG00000143319.16
					ENSG00000143320.8
					ENSG00000143321.18
					ENSG00000143322.19
					ENSG00000143324.13
					ENSG00000143333.6
					ENSG00000143337.18
					ENSG00000143340.6
					ENSG00000143341.11
					ENSG00000143344.15
					ENSG00000143353.11
					ENSG00000143355.15
					ENSG00000143363.15
					ENSG00000143365.16
					ENSG00000143367.15
					ENSG00000143368.9
					ENSG00000143369.14
					ENSG00000143373.17
					ENSG00000143374.15
					ENSG00000143375.14
					ENSG00000143376.12
					ENSG00000143379.12
					ENSG00000143382.14
					ENSG00000143384.12
					ENSG00000143387.12
					ENSG00000143390.17
					ENSG00000143393.16
					ENSG00000143398.19
					ENSG00000143401.14
					ENSG00000143409.15
					ENSG00000143412.9
					ENSG00000143416.20
					ENSG00000143418.19
					ENSG00000143420.17
					ENSG00000143434.15
					ENSG00000143436.10
					ENSG00000143437.20
					ENSG00000143442.21
					ENSG00000143443.9
					ENSG00000143450.15
					ENSG00000143452.15
					ENSG00000143457.10
					ENSG00000143458.11
					ENSG00000143469.17
					ENSG00000143473.11
					ENSG00000143476.17
					ENSG00000143479.15
					ENSG00000143486.15
					ENSG00000143493.12
					ENSG00000143494.15
					ENSG00000143498.17
					ENSG00000143499.13
					ENSG00000143502.14
					ENSG00000143507.17
					ENSG00000143512.12
					ENSG00000143514.16
					ENSG00000143515.16
					ENSG00000143520.6
					ENSG00000143536.7
					ENSG00000143537.13
					ENSG00000143543.14
					ENSG00000143545.8
					ENSG00000143546.9
					ENSG00000143549.19
					ENSG00000143552.9
					ENSG00000143553.10
					ENSG00000143554.13
					ENSG00000143556.8
					ENSG00000143569.18
					ENSG00000143570.17
					ENSG00000143575.14
					ENSG00000143578.15
					ENSG00000143590.13
					ENSG00000143595.12
					ENSG00000143603.18
					ENSG00000143612.18
					ENSG00000143614.9
					ENSG00000143621.16
					ENSG00000143622.10
					ENSG00000143624.13
					ENSG00000143627.17
					ENSG00000143630.9
					ENSG00000143631.10
					ENSG00000143632.14
					ENSG00000143633.12
					ENSG00000143641.9
					ENSG00000143643.12
					ENSG00000143653.9
					ENSG00000143669.13
					ENSG00000143674.10
					ENSG00000143702.15
					ENSG00000143740.14
					ENSG00000143742.12
					ENSG00000143748.17
					ENSG00000143751.9
					ENSG00000143753.12
					ENSG00000143756.11
					ENSG00000143761.14
					ENSG00000143768.12
					ENSG00000143771.11
					ENSG00000143772.9
					ENSG00000143774.16
					ENSG00000143776.18
					ENSG00000143786.7
					ENSG00000143793.12
					ENSG00000143799.12
					ENSG00000143801.16
					ENSG00000143811.17
					ENSG00000143815.14
					ENSG00000143816.7
					ENSG00000143819.12
					ENSG00000143839.14
					ENSG00000143842.14
					ENSG00000143845.14
					ENSG00000143847.15
					ENSG00000143850.13
					ENSG00000143851.15
					ENSG00000143858.11
					ENSG00000143862.7
					ENSG00000146463.11
					ENSG00000149527.17
					ENSG00000150337.13
					ENSG00000150681.9
					ENSG00000151414.14
					ENSG00000151418.11
					ENSG00000152061.23
					ENSG00000152078.9
					ENSG00000152092.15
					ENSG00000152104.11
					ENSG00000152332.15
					ENSG00000152382.5
					ENSG00000152760.9
					ENSG00000152763.16
					ENSG00000152904.11
					ENSG00000153029.14
					ENSG00000153187.17
					ENSG00000153207.14
					ENSG00000153898.12
					ENSG00000153904.18
					ENSG00000153936.16
					ENSG00000154007.6
					ENSG00000154027.18
					ENSG00000154222.14
					ENSG00000154305.16
					ENSG00000154309.8
					ENSG00000154342.5
					ENSG00000154358.20
					ENSG00000154370.14
					ENSG00000154380.17
					ENSG00000154429.10
					ENSG00000154451.14
					ENSG00000154511.11
					ENSG00000155363.18
					ENSG00000155366.16
					ENSG00000155367.15
					ENSG00000155380.11
					ENSG00000155761.13
					ENSG00000155816.19
					ENSG00000156097.12
					ENSG00000156150.6
					ENSG00000156171.14
					ENSG00000156869.12
					ENSG00000156875.13
					ENSG00000156876.9
					ENSG00000157060.15
					ENSG00000157064.10
					ENSG00000157077.14
					ENSG00000157131.10
					ENSG00000157181.15
					ENSG00000157184.6
					ENSG00000157191.19
					ENSG00000157193.15
					ENSG00000157211.11
					ENSG00000157216.15
					ENSG00000157330.9
					ENSG00000157870.14
					ENSG00000157873.17
					ENSG00000157881.13
					ENSG00000157911.9
					ENSG00000157916.19
					ENSG00000157933.9
					ENSG00000157978.11
					ENSG00000158006.13
					ENSG00000158008.9
					ENSG00000158014.14
					ENSG00000158022.6
					ENSG00000158055.15
					ENSG00000158062.20
					ENSG00000158109.14
					ENSG00000158156.7
					ENSG00000158161.15
					ENSG00000158195.10
					ENSG00000158246.7
					ENSG00000158286.12
					ENSG00000158292.6
					ENSG00000158315.10
					ENSG00000158473.6
					ENSG00000158477.6
					ENSG00000158481.12
					ENSG00000158485.10
					ENSG00000158488.15
					ENSG00000158615.8
					ENSG00000158710.14
					ENSG00000158711.13
					ENSG00000158714.10
					ENSG00000158715.5
					ENSG00000158716.8
					ENSG00000158747.13
					ENSG00000158748.3
					ENSG00000158764.6
					ENSG00000158769.17
					ENSG00000158773.14
					ENSG00000158786.4
					ENSG00000158793.13
					ENSG00000158796.16
					ENSG00000158816.15
					ENSG00000158825.5
					ENSG00000158828.6
					ENSG00000158850.14
					ENSG00000158859.9
					ENSG00000158864.12
					ENSG00000158869.10
					ENSG00000158874.11
					ENSG00000158882.13
					ENSG00000158887.15
					ENSG00000158966.13
					ENSG00000159023.19
					ENSG00000159164.9
					ENSG00000159166.13
					ENSG00000159173.18
					ENSG00000159176.13
					ENSG00000159189.11
					ENSG00000159208.15
					ENSG00000159214.12
					ENSG00000159339.13
					ENSG00000159346.12
					ENSG00000159348.12
					ENSG00000159352.15
					ENSG00000159363.17
					ENSG00000159377.10
					ENSG00000159388.5
					ENSG00000159409.14
					ENSG00000159423.16
					ENSG00000159445.12
					ENSG00000159450.12
					ENSG00000159455.8
					ENSG00000159479.16
					ENSG00000159516.8
					ENSG00000159527.3
					ENSG00000159588.14
					ENSG00000159592.10
					ENSG00000159596.6
					ENSG00000159658.10
					ENSG00000160049.11
					ENSG00000160050.14
					ENSG00000160051.11
					ENSG00000160055.19
					ENSG00000160058.18
					ENSG00000160062.14
					ENSG00000160072.19
					ENSG00000160075.11
					ENSG00000160087.20
					ENSG00000160094.14
					ENSG00000160097.15
					ENSG00000160678.11
					ENSG00000160679.12
					ENSG00000160685.13
					ENSG00000160688.18
					ENSG00000160691.18
					ENSG00000160710.15
					ENSG00000160712.12
					ENSG00000160714.9
					ENSG00000160716.5
					ENSG00000160741.16
					ENSG00000160752.14
					ENSG00000160753.15
					ENSG00000160767.20
					ENSG00000160781.15
					ENSG00000160783.19
					ENSG00000160785.13
					ENSG00000160789.19
					ENSG00000160803.7
					ENSG00000160818.16
					ENSG00000160838.13
					ENSG00000160856.20
					ENSG00000162365.11
					ENSG00000162366.7
					ENSG00000162367.11
					ENSG00000162368.13
					ENSG00000162373.12
					ENSG00000162374.16
					ENSG00000162377.5
					ENSG00000162378.12
					ENSG00000162383.11
					ENSG00000162384.13
					ENSG00000162385.10
					ENSG00000162390.17
					ENSG00000162391.11
					ENSG00000162396.5
					ENSG00000162398.11
					ENSG00000162399.6
					ENSG00000162402.13
					ENSG00000162407.8
					ENSG00000162408.10
					ENSG00000162409.10
					ENSG00000162413.16
					ENSG00000162415.6
					ENSG00000162419.12
					ENSG00000162426.14
					ENSG00000162430.16
					ENSG00000162433.14
					ENSG00000162434.11
					ENSG00000162437.14
					ENSG00000162438.11
					ENSG00000162441.11
					ENSG00000162444.11
					ENSG00000162456.9
					ENSG00000162458.12
					ENSG00000162460.6
					ENSG00000162461.7
					ENSG00000162482.4
					ENSG00000162490.6
					ENSG00000162493.16
					ENSG00000162494.5
					ENSG00000162496.8
					ENSG00000162510.5
					ENSG00000162511.7
					ENSG00000162512.15
					ENSG00000162517.12
					ENSG00000162520.14
					ENSG00000162521.18
					ENSG00000162522.10
					ENSG00000162526.6
					ENSG00000162542.13
					ENSG00000162543.5
					ENSG00000162545.5
					ENSG00000162551.13
					ENSG00000162552.14
					ENSG00000162571.13
					ENSG00000162572.19
					ENSG00000162576.16
					ENSG00000162585.16
					ENSG00000162591.15
					ENSG00000162592.9
					ENSG00000162594.15
					ENSG00000162595.5
					ENSG00000162598.13
					ENSG00000162599.15
					ENSG00000162600.11
					ENSG00000162601.9
					ENSG00000162604.12
					ENSG00000162607.12
					ENSG00000162613.16
					ENSG00000162614.18
					ENSG00000162616.8
					ENSG00000162618.12
					ENSG00000162620.15
					ENSG00000162621.6
					ENSG00000162623.15
					ENSG00000162624.14
					ENSG00000162627.16
					ENSG00000162630.5
					ENSG00000162631.18
					ENSG00000162636.15
					ENSG00000162639.15
					ENSG00000162641.18
					ENSG00000162642.13
					ENSG00000162643.12
					ENSG00000162645.12
					ENSG00000162650.16
					ENSG00000162654.8
					ENSG00000162664.16
					ENSG00000162669.15
					ENSG00000162670.10
					ENSG00000162676.11
					ENSG00000162687.16
					ENSG00000162688.16
					ENSG00000162692.10
					ENSG00000162694.13
					ENSG00000162695.11
					ENSG00000162702.7
					ENSG00000162704.15
					ENSG00000162706.12
					ENSG00000162711.16
					ENSG00000162714.12
					ENSG00000162722.8
					ENSG00000162723.9
					ENSG00000162728.4
					ENSG00000162729.13
					ENSG00000162733.16
					ENSG00000162734.12
					ENSG00000162735.18
					ENSG00000162736.15
					ENSG00000162738.5
					ENSG00000162739.13
					ENSG00000162745.10
					ENSG00000162746.14
					ENSG00000162747.9
					ENSG00000162753.11
					ENSG00000162755.13
					ENSG00000162757.4
					ENSG00000162761.14
					ENSG00000162763.3
					ENSG00000162769.12
					ENSG00000162772.16
					ENSG00000162775.14
					ENSG00000162777.16
					ENSG00000162779.21
					ENSG00000162782.15
					ENSG00000162813.17
					ENSG00000162814.10
					ENSG00000162817.6
					ENSG00000162819.11
					ENSG00000162825.16
					ENSG00000162836.11
					ENSG00000162843.17
					ENSG00000162849.15
					ENSG00000162851.7
					ENSG00000162852.13
					ENSG00000162873.14
					ENSG00000162877.12
					ENSG00000162885.12
					ENSG00000162889.10
					ENSG00000162891.10
					ENSG00000162892.15
					ENSG00000162894.11
					ENSG00000162896.5
					ENSG00000162897.14
					ENSG00000162909.17
					ENSG00000162910.18
					ENSG00000162913.9
					ENSG00000162923.14
					ENSG00000162931.11
					ENSG00000162946.20
					ENSG00000163041.9
					ENSG00000163050.16
					ENSG00000163125.15
					ENSG00000163131.10
					ENSG00000163141.18
					ENSG00000163154.5
					ENSG00000163155.11
					ENSG00000163156.11
					ENSG00000163157.14
					ENSG00000163159.11
					ENSG00000163191.5
					ENSG00000163202.4
					ENSG00000163206.5
					ENSG00000163207.6
					ENSG00000163209.14
					ENSG00000163216.6
					ENSG00000163218.14
					ENSG00000163220.10
					ENSG00000163221.8
					ENSG00000163239.12
					ENSG00000163263.6
					ENSG00000163344.5
					ENSG00000163346.16
					ENSG00000163348.3
					ENSG00000163349.21
					ENSG00000163354.14
					ENSG00000163357.10
					ENSG00000163362.10
					ENSG00000163374.19
					ENSG00000163382.11
					ENSG00000163393.12
					ENSG00000163395.16
					ENSG00000163399.15
					ENSG00000163431.12
					ENSG00000163435.15
					ENSG00000163444.11
					ENSG00000163462.17
					ENSG00000163463.11
					ENSG00000163467.11
					ENSG00000163468.14
					ENSG00000163472.18
					ENSG00000163479.13
					ENSG00000163485.15
					ENSG00000163518.10
					ENSG00000163531.15
					ENSG00000163534.14
					ENSG00000163545.8
					ENSG00000163554.12
					ENSG00000163563.7
					ENSG00000163564.14
					ENSG00000163565.18
					ENSG00000163568.14
					ENSG00000163866.8
					ENSG00000163867.16
					ENSG00000163873.9
					ENSG00000163874.9
					ENSG00000163875.15
					ENSG00000163877.9
					ENSG00000163879.10
					ENSG00000163909.7
					ENSG00000164002.11
					ENSG00000164007.10
					ENSG00000164008.14
					ENSG00000164010.13
					ENSG00000164011.17
					ENSG00000168118.11
					ENSG00000168159.10
					ENSG00000168243.10
					ENSG00000168264.10
					ENSG00000168275.14
					ENSG00000168389.17
					ENSG00000168509.19
					ENSG00000168528.11
					ENSG00000168653.10
					ENSG00000168679.17
					ENSG00000168710.17
					ENSG00000168765.15
					ENSG00000169174.10
					ENSG00000169213.6
					ENSG00000169218.13
					ENSG00000169224.12
					ENSG00000169231.13
					ENSG00000169241.17
					ENSG00000169242.11
					ENSG00000169291.9
					ENSG00000169403.11
					ENSG00000169418.9
					ENSG00000169442.8
					ENSG00000169469.8
					ENSG00000169504.14
					ENSG00000169509.5
					ENSG00000169598.15
					ENSG00000169641.13
					ENSG00000169885.9
					ENSG00000169905.12
					ENSG00000169914.5
					ENSG00000169962.4
					ENSG00000169972.11
					ENSG00000169991.10
					ENSG00000170075.8
					ENSG00000170382.11
					ENSG00000170385.9
					ENSG00000170498.8
					ENSG00000170989.8
					ENSG00000171161.12
					ENSG00000171163.15
					ENSG00000171357.5
					ENSG00000171385.9
					ENSG00000171488.14
					ENSG00000171492.14
					ENSG00000171502.14
					ENSG00000171517.5
					ENSG00000171603.16
					ENSG00000171608.15
					ENSG00000171612.6
					ENSG00000171621.13
					ENSG00000171680.20
					ENSG00000171722.12
					ENSG00000171729.13
					ENSG00000171735.18
					ENSG00000171786.5
					ENSG00000171790.15
					ENSG00000171793.13
					ENSG00000171806.11
					ENSG00000171812.11
					ENSG00000171819.4
					ENSG00000171824.13
					ENSG00000171872.4
					ENSG00000171943.11
					ENSG00000171960.10
					ENSG00000172031.6
					ENSG00000172155.9
					ENSG00000172260.14
					ENSG00000172339.9
					ENSG00000172380.5
					ENSG00000172410.4
					ENSG00000172456.17
					ENSG00000173171.14
					ENSG00000173207.12
					ENSG00000173212.4
					ENSG00000173218.14
					ENSG00000173369.15
					ENSG00000173372.16
					ENSG00000173406.15
					ENSG00000173409.13
					ENSG00000173436.13
					ENSG00000173614.13
					ENSG00000173627.7
					ENSG00000173641.17
					ENSG00000173660.11
					ENSG00000173662.20
					ENSG00000173673.7
					ENSG00000173726.10
					ENSG00000173728.10
					ENSG00000173846.12
					ENSG00000173947.13
					ENSG00000174021.10
					ENSG00000174059.16
					ENSG00000174151.14
					ENSG00000174175.16
					ENSG00000174307.6
					ENSG00000174332.5
					ENSG00000174348.13
					ENSG00000174371.16
					ENSG00000174502.18
					ENSG00000174514.12
					ENSG00000174567.7
					ENSG00000174574.15
					ENSG00000174606.13
					ENSG00000174827.13
					ENSG00000174842.16
					ENSG00000174876.16
					ENSG00000174950.10
					ENSG00000175087.9
					ENSG00000175130.6
					ENSG00000175137.10
					ENSG00000175206.10
					ENSG00000175262.14
					ENSG00000175279.21
					ENSG00000175707.8
					ENSG00000175756.13
					ENSG00000175984.14
					ENSG00000176083.17
					ENSG00000176092.13
					ENSG00000176256.10
					ENSG00000176261.15
					ENSG00000176393.10
					ENSG00000176444.18
					ENSG00000177000.10
					ENSG00000177181.14
					ENSG00000177301.13
					ENSG00000177414.13
					ENSG00000177614.10
					ENSG00000177628.15
					ENSG00000177674.15
					ENSG00000177807.7
					ENSG00000177868.11
					ENSG00000177888.7
					ENSG00000177954.11
					ENSG00000178028.13
					ENSG00000178096.8
					ENSG00000178104.19
					ENSG00000178585.14
					ENSG00000178796.12
					ENSG00000178821.12
					ENSG00000178922.16
					ENSG00000178965.13
					ENSG00000179002.5
					ENSG00000179051.13
					ENSG00000179085.7
					ENSG00000179163.11
					ENSG00000179172.9
					ENSG00000179178.10
					ENSG00000179397.17
					ENSG00000179403.11
					ENSG00000179456.10
					ENSG00000179639.10
					ENSG00000179902.12
					ENSG00000179914.4
					ENSG00000179930.5
					ENSG00000180098.9
					ENSG00000180198.15
					ENSG00000180287.16
					ENSG00000180488.14
					ENSG00000180667.10
					ENSG00000180758.11
					ENSG00000180875.4
					ENSG00000180999.10
					ENSG00000181036.13
					ENSG00000181450.17
					ENSG00000181656.6
					ENSG00000181754.6
					ENSG00000181773.6
					ENSG00000181817.5
					ENSG00000181873.12
					ENSG00000182004.12
					ENSG00000182118.6
					ENSG00000182134.15
					ENSG00000182183.14
					ENSG00000182330.10
					ENSG00000182749.5
					ENSG00000182795.12
					ENSG00000182827.8
					ENSG00000182866.16
					ENSG00000182898.3
					ENSG00000182901.16
					ENSG00000183155.4
					ENSG00000183291.15
					ENSG00000183317.16
					ENSG00000183347.14
					ENSG00000183386.9
					ENSG00000183431.11
					ENSG00000183508.4
					ENSG00000183520.11
					ENSG00000183615.5
					ENSG00000183682.7
					ENSG00000183726.10
					ENSG00000183780.12
					ENSG00000183814.15
					ENSG00000183831.6
					ENSG00000183853.17
					ENSG00000183856.10
					ENSG00000183888.4
					ENSG00000184005.10
					ENSG00000184007.18
					ENSG00000184144.10
					ENSG00000184148.3
					ENSG00000184163.3
					ENSG00000184313.19
					ENSG00000184330.11
					ENSG00000184371.13
					ENSG00000184389.9
					ENSG00000184454.6
					ENSG00000184588.17
					ENSG00000184599.13
					ENSG00000184677.16
					ENSG00000184908.17
					ENSG00000185090.14
					ENSG00000185104.19
					ENSG00000185155.11
					ENSG00000185220.11
					ENSG00000185278.15
					ENSG00000185420.18
					ENSG00000185436.11
					ENSG00000185483.11
					ENSG00000185499.16
					ENSG00000185519.8
					ENSG00000185523.6
					ENSG00000185630.18
					ENSG00000185842.14
					ENSG00000185860.13
					ENSG00000185888.5
					ENSG00000185946.15
					ENSG00000185966.3
					ENSG00000186007.9
					ENSG00000186063.12
					ENSG00000186086.17
					ENSG00000186094.16
					ENSG00000186118.8
					ENSG00000186141.8
					ENSG00000186160.4
					ENSG00000186197.13
					ENSG00000186205.12
					ENSG00000186207.4
					ENSG00000186226.8
					ENSG00000186283.13
					ENSG00000186364.11
					ENSG00000186377.7
					ENSG00000186409.14
					ENSG00000186501.14
					ENSG00000186510.11
					ENSG00000186517.13
					ENSG00000186827.10
					ENSG00000186891.13
					ENSG00000186973.10
					ENSG00000187010.19
					ENSG00000187017.15
					ENSG00000187048.12
					ENSG00000187144.11
					ENSG00000187147.17
					ENSG00000187170.4
					ENSG00000187173.3
					ENSG00000187180.3
					ENSG00000187223.3
					ENSG00000187513.8
					ENSG00000187545.5
					ENSG00000187554.11
					ENSG00000187583.10
					ENSG00000187608.8
					ENSG00000187634.11
					ENSG00000187642.9
					ENSG00000187730.7
					ENSG00000187733.6
					ENSG00000187800.13
					ENSG00000187801.14
					ENSG00000187815.9
					ENSG00000187862.11
					ENSG00000187889.12
					ENSG00000187942.11
					ENSG00000187961.13
					ENSG00000187980.6
					ENSG00000188004.9
					ENSG00000188015.9
					ENSG00000188060.6
					ENSG00000188092.14
					ENSG00000188157.13
					ENSG00000188257.10
					ENSG00000188290.10
					ENSG00000188295.14
					ENSG00000188404.8
					ENSG00000188529.14
					ENSG00000188585.7
					ENSG00000188610.12
					ENSG00000188641.12
					ENSG00000188643.10
					ENSG00000188672.17
					ENSG00000188739.14
					ENSG00000188761.11
					ENSG00000188770.9
					ENSG00000188782.8
					ENSG00000188783.5
					ENSG00000188784.4
					ENSG00000188786.9
					ENSG00000188800.5
					ENSG00000188807.12
					ENSG00000188822.7
					ENSG00000188859.6
					ENSG00000188910.7
					ENSG00000188931.3
					ENSG00000188976.10
					ENSG00000188984.11
					ENSG00000189171.14
					ENSG00000189195.10
					ENSG00000189266.11
					ENSG00000189280.3
					ENSG00000189334.8
					ENSG00000189337.16
					ENSG00000189339.11
					ENSG00000189409.13
					ENSG00000189410.11
					ENSG00000189433.5
					ENSG00000196071.4
					ENSG00000196154.11
					ENSG00000196182.10
					ENSG00000196187.11
					ENSG00000196188.10
					ENSG00000196189.12
					ENSG00000196242.7
					ENSG00000196352.14
					ENSG00000196369.10
					ENSG00000196407.11
					ENSG00000196418.12
					ENSG00000196420.7
					ENSG00000196427.13
					ENSG00000196449.3
					ENSG00000196482.16
					ENSG00000196505.10
					ENSG00000196517.11
					ENSG00000196550.10
					ENSG00000196581.10
					ENSG00000196660.10
					ENSG00000196754.10
					ENSG00000196878.13
					ENSG00000197056.9
					ENSG00000197084.5
					ENSG00000197106.6
					ENSG00000197147.12
					ENSG00000197241.3
					ENSG00000197245.5
					ENSG00000197273.3
					ENSG00000197312.11
					ENSG00000197323.11
					ENSG00000197364.6
					ENSG00000197429.10
					ENSG00000197472.14
					ENSG00000197520.10
					ENSG00000197530.12
					ENSG00000197568.13
					ENSG00000197587.10
					ENSG00000197622.12
					ENSG00000197721.16
					ENSG00000197747.8
					ENSG00000197769.5
					ENSG00000197780.9
					ENSG00000197785.13
					ENSG00000197852.9
					ENSG00000197880.8
					ENSG00000197915.5
					ENSG00000197921.5
					ENSG00000197956.9
					ENSG00000197959.13
					ENSG00000197965.11
					ENSG00000197982.13
					ENSG00000198019.12
					ENSG00000198049.6
					ENSG00000198160.14
					ENSG00000198162.12
					ENSG00000198198.14
					ENSG00000198216.10
					ENSG00000198400.11
					ENSG00000198483.12
					ENSG00000198492.15
					ENSG00000198520.10
					ENSG00000198570.5
					ENSG00000198574.5
					ENSG00000198625.12
					ENSG00000198626.15
					ENSG00000198691.11
					ENSG00000198700.9
					ENSG00000198715.11
					ENSG00000198734.10
					ENSG00000198746.12
					ENSG00000198756.10
					ENSG00000198758.10
					ENSG00000198765.11
					ENSG00000198771.10
					ENSG00000198793.12
					ENSG00000198797.6
					ENSG00000198799.11
					ENSG00000198815.8
					ENSG00000198821.10
					ENSG00000198830.10
					ENSG00000198835.3
					ENSG00000198837.9
					ENSG00000198842.9
					ENSG00000198860.11
					ENSG00000198892.6
					ENSG00000198912.10
					ENSG00000198929.12
					ENSG00000198952.8
					ENSG00000203666.12
					ENSG00000203667.9
					ENSG00000203668.2
					ENSG00000203685.9
					ENSG00000203697.11
					ENSG00000203705.10
					ENSG00000203710.10
					ENSG00000203724.10
					ENSG00000203740.3
					ENSG00000203747.9
					ENSG00000203782.5
					ENSG00000203783.4
					ENSG00000203784.2
					ENSG00000203785.8
					ENSG00000203814.6
					ENSG00000203857.9
					ENSG00000203859.9
					ENSG00000203910.8
					ENSG00000203943.8
					ENSG00000203963.11
					ENSG00000203965.12
					ENSG00000203985.10
					ENSG00000203995.9
					ENSG00000204006.8
					ENSG00000204060.6
					ENSG00000204084.12
					ENSG00000204138.12
					ENSG00000204160.11
					ENSG00000204178.9
					ENSG00000204219.9
					ENSG00000204478.9
					ENSG00000204479.4
					ENSG00000204480.7
					ENSG00000204481.7
					ENSG00000204501.6
					ENSG00000204505.4
					ENSG00000204510.5
					ENSG00000204518.2
					ENSG00000204624.7
					ENSG00000204859.12
					ENSG00000205090.8
					ENSG00000205116.3
					ENSG00000211452.10
					ENSG00000213047.11
					ENSG00000213064.9
					ENSG00000213085.9
					ENSG00000213088.9
					ENSG00000213171.2
					ENSG00000213190.3
					ENSG00000213240.8
					ENSG00000213281.4
					ENSG00000213366.12
					ENSG00000213512.1
					ENSG00000213516.9
					ENSG00000213625.8
					ENSG00000214114.8
					ENSG00000214193.9
					ENSG00000215704.9
					ENSG00000215717.5
					ENSG00000215784.5
					ENSG00000215788.9
					ENSG00000215790.6
					ENSG00000215817.5
					ENSG00000215845.10
					ENSG00000215853.3
					ENSG00000215883.10
					ENSG00000215906.8
					ENSG00000215910.7
					ENSG00000215912.12
					ENSG00000215915.9
					ENSG00000219073.7
					ENSG00000219481.10
					ENSG00000221978.11
					ENSG00000221986.6
					ENSG00000222009.8
					ENSG00000222046.2
					ENSG00000224051.6
					ENSG00000225556.1
					ENSG00000225828.1
					ENSG00000227868.5
					ENSG00000229571.6
					ENSG00000230124.6
					ENSG00000232113.2
					ENSG00000232237.3
					ENSG00000232423.6
					ENSG00000235098.8
					ENSG00000235169.7
					ENSG00000235750.9
					ENSG00000235942.2
					ENSG00000236782.6
					ENSG00000237330.2
					ENSG00000237763.9
					ENSG00000239810.3
					ENSG00000239887.4
					ENSG00000240021.9
					ENSG00000240038.6
					ENSG00000240563.1
					ENSG00000241563.3
					ENSG00000241794.1
					ENSG00000242252.1
					ENSG00000242485.5
					ENSG00000243073.3
					ENSG00000243284.1
					ENSG00000243364.7
					ENSG00000243480.7
					ENSG00000243709.1
					ENSG00000243710.7
					ENSG00000243725.6
					ENSG00000243749.1
					ENSG00000244038.9
					ENSG00000244094.1
					ENSG00000244414.6
					ENSG00000248333.8
					ENSG00000248485.1
					ENSG00000250719.1
					ENSG00000251246.1
					ENSG00000251503.8
					ENSG00000253148.1
					ENSG00000253304.1
					ENSG00000253313.5
					ENSG00000253368.3
					ENSG00000253831.1
					ENSG00000254553.1
					ENSG00000254685.6
					ENSG00000254706.2
					ENSG00000254726.2
					ENSG00000255054.3
					ENSG00000255275.3
					ENSG00000255835.1
					ENSG00000256029.5
					ENSG00000256407.2
					ENSG00000258465.6
					ENSG00000259030.6
					ENSG00000259823.5
					ENSG00000260238.6
					ENSG00000263513.5
					ENSG00000263528.7
					ENSG00000263956.6
					ENSG00000263961.6
					ENSG00000264343.5
					ENSG00000264522.5
					ENSG00000265107.2
					ENSG00000265241.6
					ENSG00000265491.4
					ENSG00000265808.3
					ENSG00000265972.5
					ENSG00000266028.7
					ENSG00000266094.7
					ENSG00000266338.6
					ENSG00000266472.5
					ENSG00000267561.2
					ENSG00000268043.7
					ENSG00000269113.3
					ENSG00000269713.7
					ENSG00000270106.5
					ENSG00000270136.5
					ENSG00000270149.5
					ENSG00000270276.2
					ENSG00000270601.4
					ENSG00000270629.5
					ENSG00000270882.2
					ENSG00000271092.5
					ENSG00000271383.6
					ENSG00000271425.6
					ENSG00000271601.3
					ENSG00000271723.5
					ENSG00000271741.1
					ENSG00000271810.5
					ENSG00000271949.1
					ENSG00000272031.2
					ENSG00000273088.1
					ENSG00000273136.6
					ENSG00000273274.1
					ENSG00000274068.1
					ENSG00000274386.5
					ENSG00000274764.5
					ENSG00000274944.4
					ENSG00000275774.2
					ENSG00000276600.4
					ENSG00000276747.1
					ENSG00000276911.1
					ENSG00000277058.2
					ENSG00000277462.1
					ENSG00000277726.4
					ENSG00000278139.1
					ENSG00000278883.1
					ENSG00000278939.1
					ENSG00000279054.1
					ENSG00000279230.1
					ENSG00000279244.1
					ENSG00000279374.1
					ENSG00000279457.3
					ENSG00000279487.1
					ENSG00000279767.1
					ENSG00000279804.1
					ENSG00000279850.1
					ENSG00000279928.1
					ENSG00000279986.1
					ENSG00000280226.1
					ENSG00000280267.4
					ENSG00000280316.1
					ENSG00000280670.2
					ENSG00000280778.1
					ENSG00000282608.1
					ENSG00000282872.1
					ENSG00000283039.1
					ENSG00000283227.1
					ENSG00000283324.1
					ENSG00000283495.1
					ENSG00000283580.1
					ENSG00000283619.1
					ENSG00000283683.1
					ENSG00000003137.8
					ENSG00000003393.14
					ENSG00000003400.14
					ENSG00000003402.19
					ENSG00000003436.14
					ENSG00000003509.15
					ENSG00000005436.13
					ENSG00000005448.16
					ENSG00000006607.13
					ENSG00000007001.12
					ENSG00000008869.11
					ENSG00000011523.13
					ENSG00000011566.14
					ENSG00000013016.15
					ENSG00000013441.15
					ENSG00000014641.17
					ENSG00000015568.12
					ENSG00000018280.16
					ENSG00000018510.13
					ENSG00000018699.11
					ENSG00000019169.10
					ENSG00000021574.11
					ENSG00000021826.14
					ENSG00000023228.13
					ENSG00000028116.16
					ENSG00000030419.16
					ENSG00000032389.12
					ENSG00000034510.5
					ENSG00000035115.21
					ENSG00000035141.7
					ENSG00000036257.12
					ENSG00000040933.15
					ENSG00000042304.10
					ENSG00000042445.13
					ENSG00000042493.15
					ENSG00000048991.16
					ENSG00000049323.15
					ENSG00000054219.10
					ENSG00000054356.13
					ENSG00000055044.10
					ENSG00000055332.16
					ENSG00000055813.5
					ENSG00000055917.15
					ENSG00000057935.13
					ENSG00000059728.10
					ENSG00000061676.14
					ENSG00000063660.8
					ENSG00000064012.21
					ENSG00000064933.16
					ENSG00000064989.12
					ENSG00000065413.17
					ENSG00000065548.17
					ENSG00000065802.11
					ENSG00000065911.11
					ENSG00000066032.18
					ENSG00000066248.14
					ENSG00000067066.16
					ENSG00000068024.16
					ENSG00000068615.17
					ENSG00000068654.15
					ENSG00000068697.6
					ENSG00000068724.15
					ENSG00000068781.21
					ENSG00000068784.12
					ENSG00000068878.14
					ENSG00000068912.13
					ENSG00000071051.13
					ENSG00000071054.16
					ENSG00000071073.12
					ENSG00000071082.10
					ENSG00000071575.11
					ENSG00000071677.1
					ENSG00000071909.18
					ENSG00000071967.11
					ENSG00000072080.10
					ENSG00000072135.12
					ENSG00000072163.19
					ENSG00000072182.12
					ENSG00000072195.14
					ENSG00000073734.8
					ENSG00000073737.16
					ENSG00000074047.21
					ENSG00000074054.17
					ENSG00000074582.12
					ENSG00000075292.18
					ENSG00000075340.22
					ENSG00000075426.11
					ENSG00000075568.16
					ENSG00000075884.12
					ENSG00000075886.10
					ENSG00000076003.4
					ENSG00000077044.10
					ENSG00000077232.16
					ENSG00000077380.15
					ENSG00000078018.19
					ENSG00000078098.13
					ENSG00000079150.17
					ENSG00000079156.16
[truncated: 32,952 more rows]

## Sheet: GenesAndSamplesSets
1000 not regulated	1000 most regulated		Brain samples	Brain genes		Heart samples	Heart genes		T-cells samples	T-cells genes
ENSG00000258465.6	ENSG00000196604.12		SRX610299	ENSG00000009709.11		SRX312133	ENSG00000116194.12		SRX424938	ENSG00000007968.6
ENSG00000168569.7	ENSG00000188219.14		SRX610301	ENSG00000011021.21		SRX312145	ENSG00000134248.13		SRX424932	ENSG00000024526.16
ENSG00000270181.1	ENSG00000179222.17		SRX610297	ENSG00000075391.16		SRX312151	ENSG00000159423.16		SRX424937	ENSG00000025800.13
ENSG00000267261.5	ENSG00000171310.10		SRX610287	ENSG00000086015.20		SRX312154	ENSG00000160678.11		SRX424941	ENSG00000057757.9
ENSG00000258017.1	ENSG00000204352.2		SRX610270	ENSG00000090020.10		SRX312137	ENSG00000162775.14		SRX424933	ENSG00000065978.18
ENSG00000263956.6	ENSG00000203814.6		SRX610269	ENSG00000116147.16		SRX312149	ENSG00000189171.14		SRX424940	ENSG00000067334.13
ENSG00000272916.5	ENSG00000185305.10		SRX610271	ENSG00000116194.12		SRX312150	ENSG00000198626.15		SRX424935	ENSG00000070785.16
ENSG00000144785.8	ENSG00000261040.6		SRX610289	ENSG00000116667.12		SRX312128	ENSG00000213625.8		SRX424936	ENSG00000076321.10
ENSG00000126214.21	ENSG00000179583.18		SRX610293	ENSG00000116698.20		SRX312138	ENSG00000075886.10		SRX424934	ENSG00000077152.9
ENSG00000255526.6	ENSG00000101307.15		SRX610296	ENSG00000116750.13		SRX312143	ENSG00000115641.18		SRX424939	ENSG00000085840.12
ENSG00000241489.7	ENSG00000222038.3		SRX610305	ENSG00000117505.12		SRX312131	ENSG00000115840.13			ENSG00000097046.12
ENSG00000272742.1	ENSG00000169372.12		SRX610307	ENSG00000117713.18		SRX312135	ENSG00000116005.11			ENSG00000116288.12
ENSG00000257342.1	ENSG00000147255.18		SRX610308	ENSG00000121905.9		SRX312153	ENSG00000138382.14			ENSG00000116497.17
ENSG00000118873.15	ENSG00000153814.11		SRX610309	ENSG00000122420.9		SRX312152	ENSG00000163092.19			ENSG00000117174.10
ENSG00000162441.11	ENSG00000198846.5		SRX610284	ENSG00000123091.4		SRX312130	ENSG00000163806.15			ENSG00000117360.12
ENSG00000177463.15	ENSG00000069493.14		SRX610273	ENSG00000125944.18		SRX312129	ENSG00000218739.9			ENSG00000117481.10
ENSG00000250151.9	ENSG00000204397.7		SRX610278	ENSG00000134644.15		SRX312134	ENSG00000239474.6			ENSG00000117614.9
ENSG00000283149.1	ENSG00000279762.3		SRX610274	ENSG00000142599.17		SRX312147	ENSG00000255767.1			ENSG00000121753.12
ENSG00000185689.15	ENSG00000184005.10		SRX610277	ENSG00000142875.19		SRX312146	ENSG00000065518.7			ENSG00000121851.12
ENSG00000254462.1	ENSG00000197943.9		SRX610290	ENSG00000143067.4		SRX312142	ENSG00000163815.5			ENSG00000132763.14
ENSG00000273003.1	ENSG00000172292.14		SRX610295	ENSG00000143248.12		SRX312141	ENSG00000182533.6			ENSG00000134684.10
ENSG00000256861.1	ENSG00000258102.3		SRX610283	ENSG00000143252.14		SRX312136	ENSG00000244607.5			ENSG00000142864.14
ENSG00000260537.2	ENSG00000254859.1		SRX610272	ENSG00000143324.13		SRX312148	ENSG00000152795.17			ENSG00000142945.12
ENSG00000261732.1	ENSG00000187634.11		SRX610294	ENSG00000143337.18		SRX312132	ENSG00000113296.14			ENSG00000143390.17
ENSG00000262621.4	ENSG00000116194.12		SRX610304	ENSG00000143473.11		SRX312127	ENSG00000131730.15			ENSG00000143486.15
ENSG00000262526.2	ENSG00000139173.9		SRX610281	ENSG00000143614.9		SRX312124	ENSG00000164587.11			ENSG00000143631.10
ENSG00000264058.1	ENSG00000176463.13		SRX610288	ENSG00000151414.14		SRX312140	ENSG00000251201.8			ENSG00000154429.10
ENSG00000105254.11	ENSG00000184349.12		SRX610316	ENSG00000153904.18		SRX312125	ENSG00000112096.16			ENSG00000158473.6
ENSG00000159917.14	ENSG00000182247.9		SRX610315	ENSG00000153936.16		SRX312126	ENSG00000124701.5			ENSG00000158485.10
ENSG00000266953.6	ENSG00000137285.9		SRX610319	ENSG00000157216.15			ENSG00000135596.17			ENSG00000158488.15
ENSG00000227671.4	ENSG00000154822.16		SRX610320	ENSG00000160781.15			ENSG00000172432.18			ENSG00000158828.6
ENSG00000254634.4	ENSG00000091592.15		SRX610300	ENSG00000162378.12			ENSG00000186439.12			ENSG00000162639.15
ENSG00000258210.1	ENSG00000131171.12		SRX610303	ENSG00000162407.8			ENSG00000198523.5			ENSG00000162676.11
ENSG00000263766.5	ENSG00000130600.16		SRX610282	ENSG00000162433.14			ENSG00000255330.9			ENSG00000162885.12
ENSG00000283103.1	ENSG00000145687.16		SRX610279	ENSG00000162552.14			ENSG00000004799.7			ENSG00000163468.14
ENSG00000117859.18	ENSG00000205940.8		SRX610285	ENSG00000162576.16			ENSG00000090266.12			ENSG00000163479.13
ENSG00000164048.13	ENSG00000163590.13		SRX610291	ENSG00000162599.15			ENSG00000154415.7			ENSG00000173726.10
ENSG00000170234.12	ENSG00000086289.11		SRX610292	ENSG00000162630.5			ENSG00000164708.5			ENSG00000182004.12
ENSG00000065060.16	ENSG00000171843.15		SRX610312	ENSG00000162733.16			ENSG00000147526.19			ENSG00000185104.19
ENSG00000109920.12	ENSG00000139946.9		SRX610311	ENSG00000162931.11			ENSG00000137154.12			ENSG00000197622.12
ENSG00000256206.2	ENSG00000115756.12		SRX610313	ENSG00000168243.10			ENSG00000172889.15			ENSG00000198830.10
ENSG00000258830.1	ENSG00000196511.13		SRX610314	ENSG00000172260.14			ENSG00000235453.8			ENSG00000030419.16
ENSG00000256500.5	ENSG00000155966.13		SRX610317	ENSG00000172380.5			ENSG00000065665.20			ENSG00000064012.21
ENSG00000179889.18	ENSG00000169554.17		SRX610275	ENSG00000173436.13			ENSG00000203867.7			ENSG00000075884.12
ENSG00000262633.1	ENSG00000187118.12		SRX610306	ENSG00000173726.10			ENSG00000068976.13			ENSG00000076003.4
ENSG00000176014.12	ENSG00000150625.16		SRX610310	ENSG00000177301.13			ENSG00000109906.13			ENSG00000087338.4
ENSG00000269307.1	ENSG00000113448.17		SRX610280	ENSG00000178965.13			ENSG00000133316.15			ENSG00000115053.15
ENSG00000124208.16	ENSG00000152495.10		SRX610286	ENSG00000185420.18			ENSG00000134825.14			ENSG00000115085.13
ENSG00000159128.14	ENSG00000204116.11		SRX610276	ENSG00000185630.18			ENSG00000010626.14			ENSG00000115232.13
ENSG00000101868.10	ENSG00000217060.1		SRX610298	ENSG00000186094.16			ENSG00000119705.9			ENSG00000124383.8
ENSG00000174353.17	ENSG00000183023.18			ENSG00000188859.6			ENSG00000129521.13			ENSG00000125637.15
ENSG00000272779.1	ENSG00000111962.7			ENSG00000197959.13			ENSG00000258466.5			ENSG00000127838.13
ENSG00000224660.1	ENSG00000106069.20			ENSG00000198929.12			ENSG00000137878.16			ENSG00000135622.12
ENSG00000244055.1	ENSG00000172164.13			ENSG00000251246.1			ENSG00000185634.11			ENSG00000135916.15
ENSG00000259595.1	ENSG00000171791.12			ENSG00000265808.3			ENSG00000125124.11			ENSG00000135953.10
ENSG00000127483.17	ENSG00000126970.15			ENSG00000266094.7			ENSG00000260342.2			ENSG00000136720.6
ENSG00000143569.18	ENSG00000170017.12			ENSG00000271425.6			ENSG00000011052.21			ENSG00000158050.4
ENSG00000255835.1	ENSG00000175029.16			ENSG00000030419.16			ENSG00000108515.17			ENSG00000162944.10
ENSG00000068796.16	ENSG00000169116.11			ENSG00000036257.12			ENSG00000109072.13			ENSG00000163029.15
ENSG00000273217.1	ENSG00000164330.16			ENSG00000055917.15			ENSG00000262814.7			ENSG00000163166.14
ENSG00000225921.6	ENSG00000155849.15			ENSG00000065802.11			ENSG00000075702.16			ENSG00000163219.11
ENSG00000105968.18	ENSG00000166446.14			ENSG00000066032.18			ENSG00000104879.4			ENSG00000163798.13
ENSG00000135241.16	ENSG00000135549.14			ENSG00000068784.12			ENSG00000105193.8			ENSG00000168918.13
ENSG00000146729.9	ENSG00000170430.9			ENSG00000075568.16			ENSG00000125730.16			ENSG00000171848.13
ENSG00000165275.9	ENSG00000228224.3			ENSG00000078018.19			ENSG00000169021.5			ENSG00000176946.11
ENSG00000107854.5	ENSG00000030419.16			ENSG00000084764.10			ENSG00000268643.1			ENSG00000008324.10
ENSG00000269897.5	ENSG00000174891.12			ENSG00000085978.21			ENSG00000101440.9			ENSG00000114200.9
ENSG00000081181.7	ENSG00000171385.9			ENSG00000091436.16			ENSG00000254806.5			ENSG00000114302.15
ENSG00000261147.1	ENSG00000108375.12			ENSG00000115353.10			ENSG00000183785.14			ENSG00000114757.18
ENSG00000133030.19	ENSG00000259516.2			ENSG00000115504.14			ENSG00000184058.12			ENSG00000144554.10
ENSG00000266086.1	ENSG00000185477.4			ENSG00000115540.14			ENSG00000198125.12			ENSG00000144821.9
ENSG00000130254.11	ENSG00000152377.13			ENSG00000115756.12			ENSG00000147164.11			ENSG00000163507.13
ENSG00000173480.10	ENSG00000150867.13			ENSG00000115806.12			ENSG00000147257.13			ENSG00000163520.13
ENSG00000283515.1	ENSG00000175274.18			ENSG00000115963.13			ENSG00000203825.4			ENSG00000163584.17
ENSG00000124181.14	ENSG00000180574.3			ENSG00000116117.17			ENSG00000227242.4			ENSG00000163817.15
ENSG00000256566.1	ENSG00000103145.10			ENSG00000118263.14			ENSG00000185986.11			ENSG00000163818.16
ENSG00000100109.16	ENSG00000159263.15			ENSG00000121964.14			ENSG00000226306.6			ENSG00000163820.14
ENSG00000267023.5	ENSG00000115919.14			ENSG00000121989.14			ENSG00000235535.7			ENSG00000163923.9
ENSG00000117242.7	ENSG00000168785.7			ENSG00000123612.15			ENSG00000236013.5			ENSG00000168386.18
ENSG00000225420.1	ENSG00000145743.15			ENSG00000128656.13			ENSG00000239775.1			ENSG00000172053.16
ENSG00000236850.4	ENSG00000170962.12			ENSG00000135953.10			ENSG00000283117.1			ENSG00000172995.16
ENSG00000146463.11	ENSG00000196636.7			ENSG00000135999.11			ENSG00000271848.1			ENSG00000173402.11
ENSG00000269713.7	ENSG00000136842.13			ENSG00000138079.13			ENSG00000185847.7			ENSG00000173585.15
ENSG00000271741.1	ENSG00000165943.4			ENSG00000138430.15			ENSG00000266969.1			ENSG00000173705.8
ENSG00000277726.4	ENSG00000185420.18			ENSG00000143919.14			ENSG00000221857.7			ENSG00000174013.7
ENSG00000144674.16	ENSG00000145779.7			ENSG00000143995.19			ENSG00000233080.2			ENSG00000177646.18
ENSG00000175792.11	ENSG00000139083.10			ENSG00000144036.15						ENSG00000179564.3
ENSG00000184432.9	ENSG00000116774.11			ENSG00000144227.4						ENSG00000180353.10
ENSG00000272410.5	ENSG00000185630.18			ENSG00000144278.14						ENSG00000182568.16
ENSG00000275740.1	ENSG00000138639.17			ENSG00000150556.16						ENSG00000183624.13
ENSG00000254673.1	ENSG00000104490.17			ENSG00000152127.8						ENSG00000206557.5
ENSG00000255872.3	ENSG00000196743.8			ENSG00000152128.13						ENSG00000232112.3
ENSG00000255339.6	ENSG00000214113.10			ENSG00000152284.4						ENSG00000109265.13
ENSG00000139641.12	ENSG00000182197.10			ENSG00000153250.18						ENSG00000109674.3
ENSG00000256950.2	ENSG00000174684.6			ENSG00000153823.18						ENSG00000125089.16
ENSG00000257390.5	ENSG00000166922.8			ENSG00000154518.9						ENSG00000132463.13
ENSG00000132612.15	ENSG00000198624.12			ENSG00000157985.18						ENSG00000138795.9
ENSG00000133193.12	ENSG00000120162.9			ENSG00000158417.10						ENSG00000145354.9
ENSG00000188223.9	ENSG00000119917.13			ENSG00000163032.11						ENSG00000156136.9
ENSG00000258674.5	ENSG00000134825.14			ENSG00000163171.7						ENSG00000164073.9
ENSG00000268750.6	ENSG00000237250.3			ENSG00000163235.15						ENSG00000173542.8
ENSG00000269343.6	ENSG00000002587.9			ENSG00000169604.19						ENSG00000181381.13
ENSG00000273734.1	ENSG00000164136.16			ENSG00000169764.14						ENSG00000028310.17
ENSG00000261582.1	ENSG00000172348.14			ENSG00000170396.7						ENSG00000043143.20
ENSG00000214135.8	ENSG00000076554.15			ENSG00000171132.13						ENSG00000043462.11
ENSG00000165874.12	ENSG00000171033.12			ENSG00000171150.7						ENSG00000051596.9
ENSG00000183604.14	ENSG00000177570.13			ENSG00000171951.4						ENSG00000072786.12
ENSG00000179818.13	ENSG00000082397.17			ENSG00000172292.14						ENSG00000083720.12
ENSG00000228363.2	ENSG00000273628.1			ENSG00000172845.13						ENSG00000112984.11
ENSG00000259080.1	ENSG00000164692.17			ENSG00000174453.9						ENSG00000113532.12
ENSG00000244513.6	ENSG00000123106.10			ENSG00000178568.14						ENSG00000123219.12
ENSG00000224186.8	ENSG00000154917.10			ENSG00000179833.4						ENSG00000145506.13
ENSG00000232581.1	ENSG00000168386.18			ENSG00000179915.22						ENSG00000164402.13
ENSG00000273432.1	ENSG00000180611.6			ENSG00000182263.13						ENSG00000164404.8
ENSG00000255252.3	ENSG00000164603.11			ENSG00000187123.14						ENSG00000164902.13
ENSG00000236051.7	ENSG00000107249.21			ENSG00000187231.13						ENSG00000170584.10
ENSG00000230532.1	ENSG00000184384.13			ENSG00000187736.12						ENSG00000170606.13
ENSG00000116747.12	ENSG00000135452.9			ENSG00000187957.7						ENSG00000181163.13
ENSG00000117862.11	ENSG00000255470.1			ENSG00000197872.11						ENSG00000196670.13
ENSG00000122218.14	ENSG00000163235.15			ENSG00000198648.10						ENSG00000196743.8
ENSG00000143418.19	ENSG00000170396.7			ENSG00000213699.8						ENSG00000205089.7
ENSG00000119004.15	ENSG00000175426.10			ENSG00000221823.10						ENSG00000228716.6
ENSG00000241962.9	ENSG00000112576.12			ENSG00000283228.1						ENSG00000031691.6
ENSG00000270898.5	ENSG00000105926.15			ENSG00000008952.16						ENSG00000112118.17
ENSG00000177479.19	ENSG00000151229.12			ENSG00000010256.10						ENSG00000112667.12
ENSG00000152348.15	ENSG00000102466.15			ENSG00000047849.21						ENSG00000112759.16
ENSG00000083097.14	ENSG00000086504.15			ENSG00000051382.8						ENSG00000118402.5
ENSG00000248919.7	ENSG00000186187.11			ENSG00000074416.13						ENSG00000118513.18
ENSG00000283239.1	ENSG00000108479.11			ENSG00000075420.12						ENSG00000124784.8
ENSG00000106785.14	ENSG00000003096.13			ENSG00000075785.12						ENSG00000131016.16
ENSG00000213551.4	ENSG00000134602.15			ENSG00000082701.14						ENSG00000137225.12
ENSG00000085063.14	ENSG00000072803.17			ENSG00000114346.13						ENSG00000155115.6
ENSG00000255639.2	ENSG00000131558.14			ENSG00000114423.18						ENSG00000168394.10
ENSG00000140553.16	ENSG00000183722.7			ENSG00000114439.18						ENSG00000172673.10
ENSG00000179335.18	ENSG00000183578.6			ENSG00000114480.12						ENSG00000204248.10
ENSG00000213918.10	ENSG00000166501.12			ENSG00000114861.18						ENSG00000204498.10
ENSG00000177302.14	ENSG00000196834.11			ENSG00000132394.10						ENSG00000233822.4
ENSG00000262660.1	ENSG00000240891.7			ENSG00000134115.12						ENSG00000237649.7
ENSG00000186814.12	ENSG00000174132.8			ENSG00000144867.11						ENSG00000255152.8
ENSG00000267699.2	ENSG00000010810.17			ENSG00000144959.9						ENSG00000006625.17
ENSG00000181666.17	ENSG00000111880.15			ENSG00000145012.12						ENSG00000105928.13
ENSG00000267216.1	ENSG00000146143.17			ENSG00000151090.17						ENSG00000105939.12
ENSG00000268193.5	ENSG00000122862.4			ENSG00000151276.23						ENSG00000105963.13
ENSG00000268400.5	ENSG00000108528.13			ENSG00000151789.10						ENSG00000106123.11
ENSG00000100028.11	ENSG00000105270.14			ENSG00000152492.13						ENSG00000106608.16
ENSG00000280828.1	ENSG00000143641.9			ENSG00000152601.17						ENSG00000106624.9
ENSG00000281896.1	ENSG00000071051.13			ENSG00000154175.16						ENSG00000128609.14
ENSG00000276550.4	ENSG00000197872.11			ENSG00000157087.16						ENSG00000146700.8
ENSG00000261556.9	ENSG00000187098.14			ENSG00000157152.16						ENSG00000166508.17
ENSG00000236810.5	ENSG00000085365.17			ENSG00000158258.16						ENSG00000188186.10
ENSG00000258959.1	ENSG00000112699.10			ENSG00000160799.11						ENSG00000188372.14
ENSG00000261312.1	ENSG00000106034.17			ENSG00000163513.17						ENSG00000196584.2
ENSG00000214719.11	ENSG00000120913.23			ENSG00000163590.13						ENSG00000196715.5
ENSG00000228315.11	ENSG00000156052.10			ENSG00000163602.9						ENSG00000213420.7
ENSG00000197429.10	ENSG00000151413.16			ENSG00000163630.10						ENSG00000214300.7
ENSG00000115364.13	ENSG00000136371.10			ENSG00000163637.11						ENSG00000104497.13
ENSG00000128699.13	ENSG00000165675.16			ENSG00000168309.16						ENSG00000104738.16
ENSG00000261796.1	ENSG00000184588.17			ENSG00000168386.18						ENSG00000133740.10
ENSG00000087269.15	ENSG00000172954.13			ENSG00000170011.13						ENSG00000136982.5
ENSG00000282218.1	ENSG00000112893.9			ENSG00000170017.12						ENSG00000147457.13
ENSG00000270249.1	ENSG00000215712.10			ENSG00000172020.12						ENSG00000156802.12
ENSG00000107949.16	ENSG00000118922.17			ENSG00000172340.14						ENSG00000160948.13
ENSG00000166435.15	ENSG00000186469.8			ENSG00000172667.10						ENSG00000168078.9
ENSG00000256632.3	ENSG00000140718.19			ENSG00000172765.16						ENSG00000173535.13
ENSG00000151327.12	ENSG00000157600.11			ENSG00000174891.12						ENSG00000175073.7
ENSG00000203546.7	ENSG00000255248.7			ENSG00000175161.13						ENSG00000175324.9
ENSG00000259066.5	ENSG00000134215.15			ENSG00000175928.5						ENSG00000184661.13
ENSG00000065457.10	ENSG00000153936.16			ENSG00000177565.16						ENSG00000044574.7
ENSG00000142188.16	ENSG00000083720.12			ENSG00000180611.6						ENSG00000106993.11
ENSG00000159086.14	ENSG00000113732.8			ENSG00000181722.16						ENSG00000130717.12
ENSG00000160294.10	ENSG00000112149.9			ENSG00000182247.9						ENSG00000135045.6
ENSG00000265590.9	ENSG00000118515.11			ENSG00000183662.10						ENSG00000135069.13
ENSG00000254413.8	ENSG00000183826.16			ENSG00000183960.8						ENSG00000148334.14
ENSG00000089820.15	ENSG00000204386.10			ENSG00000185565.11						ENSG00000165264.10
ENSG00000205583.13	ENSG00000058091.16			ENSG00000186432.8						ENSG00000186193.8
ENSG00000250299.5	ENSG00000182154.7			ENSG00000187098.14						ENSG00000096717.11
ENSG00000203865.9	ENSG00000148655.14			ENSG00000187118.12						ENSG00000107566.13
ENSG00000237298.9	ENSG00000172531.14			ENSG00000189283.9						ENSG00000107581.12
ENSG00000232729.7	ENSG00000175899.14			ENSG00000196220.15						ENSG00000107625.12
ENSG00000255857.5	ENSG00000168952.15			ENSG00000196277.15						ENSG00000122952.16
ENSG00000259589.2	ENSG00000141627.13			ENSG00000196353.11						ENSG00000138190.16
ENSG00000261771.5	ENSG00000170558.8			ENSG00000196428.12						ENSG00000138346.14
ENSG00000261824.6	ENSG00000225449.3			ENSG00000198836.8						ENSG00000151892.14
ENSG00000215424.9	ENSG00000247134.6			ENSG00000240891.7						ENSG00000156374.14
ENSG00000004455.16	ENSG00000116667.12			ENSG00000072832.14						ENSG00000165672.6
ENSG00000270106.5	ENSG00000189283.9			ENSG00000078140.13						ENSG00000165983.14
ENSG00000168883.19	ENSG00000010818.8			ENSG00000109133.12						ENSG00000170312.15
ENSG00000274049.4	ENSG00000205269.5			ENSG00000109189.12						ENSG00000170759.10
ENSG00000003756.16	ENSG00000128573.23			ENSG00000109339.18						ENSG00000176273.14
ENSG00000120742.10	ENSG00000120594.16			ENSG00000109436.7						ENSG00000187122.16
ENSG00000145075.11	ENSG00000129151.8			ENSG00000109670.13						ENSG00000197746.13
ENSG00000024862.17	ENSG00000149218.4			ENSG00000109756.8						ENSG00000002330.13
ENSG00000105821.14	ENSG00000216819.1			ENSG00000118579.12						ENSG00000075239.13
ENSG00000160917.14	ENSG00000233080.2			ENSG00000120519.14						ENSG00000109861.15
ENSG00000243335.8	ENSG00000116991.10			ENSG00000138639.17						ENSG00000110536.13
ENSG00000107371.12	ENSG00000171492.14			ENSG00000138670.17						ENSG00000118181.10
ENSG00000122705.16	ENSG00000174607.10			ENSG00000138696.10						ENSG00000118363.11
ENSG00000213619.9	ENSG00000152422.15			ENSG00000138814.16						ENSG00000134802.17
ENSG00000111786.8	ENSG00000156639.11			ENSG00000145335.15						ENSG00000137509.10
ENSG00000283208.1	ENSG00000168090.9			ENSG00000145349.16						ENSG00000149541.9
ENSG00000089916.17	ENSG00000119522.16			ENSG00000145431.10						ENSG00000149554.12
ENSG00000125952.18	ENSG00000167081.16			ENSG00000145451.12						ENSG00000151498.11
ENSG00000254692.1	ENSG00000139734.17			ENSG00000151247.12						ENSG00000159063.12
ENSG00000137822.12	ENSG00000139832.4			ENSG00000151611.13						ENSG00000160683.4
ENSG00000260729.1	ENSG00000165521.15			ENSG00000151612.15						ENSG00000166352.15
ENSG00000279765.3	ENSG00000168461.12			ENSG00000151623.14						ENSG00000168439.16
ENSG00000140650.11	ENSG00000182621.17			ENSG00000152953.12						ENSG00000172531.14
ENSG00000185158.12	ENSG00000162433.14			ENSG00000152969.17						ENSG00000173020.10
ENSG00000262304.2	ENSG00000163602.9			ENSG00000154447.14						ENSG00000174903.15
ENSG00000264187.1	ENSG00000109670.13			ENSG00000155011.8						ENSG00000175097.7
ENSG00000267618.5	ENSG00000135604.9			ENSG00000157404.15						ENSG00000175216.14
ENSG00000270647.5	ENSG00000173114.12			ENSG00000163110.14						ENSG00000175348.10
ENSG00000100084.14	ENSG00000175115.11			ENSG00000163138.18						ENSG00000177700.5
ENSG00000100296.13	ENSG00000140563.14			ENSG00000163285.7						ENSG00000185627.17
ENSG00000258555.6	ENSG00000196628.14			ENSG00000164106.7						ENSG00000204370.8
ENSG00000197779.13	ENSG00000101849.15			ENSG00000164136.16						ENSG00000213593.9
ENSG00000187953.10	ENSG00000157216.15			ENSG00000168824.14						ENSG00000278615.4
ENSG00000214331.8	ENSG00000127955.15			ENSG00000168843.13						ENSG00000010610.9
ENSG00000237296.9	ENSG00000164983.7			ENSG00000169116.11						ENSG00000075415.12
ENSG00000272758.5	ENSG00000106829.18			ENSG00000183090.5						ENSG00000076248.10
ENSG00000214106.7	ENSG00000127083.7			ENSG00000183783.6						ENSG00000087448.9
ENSG00000273784.4	ENSG00000135447.16			ENSG00000184178.15						ENSG00000089053.12
ENSG00000261460.1	ENSG00000006007.11			ENSG00000196104.10						ENSG00000089157.15
ENSG00000260280.5	ENSG00000225760.2			ENSG00000198498.9						ENSG00000110801.13
ENSG00000265794.5	ENSG00000250303.3			ENSG00000237765.6						ENSG00000111237.18
ENSG00000235191.1	ENSG00000185104.19			ENSG00000072803.17						ENSG00000111716.12
ENSG00000267984.1	ENSG00000118689.14			ENSG00000078295.16						ENSG00000120837.7
ENSG00000268056.5	ENSG00000172673.10			ENSG00000085365.17						ENSG00000123338.12
ENSG00000269749.1	ENSG00000135272.9			ENSG00000112902.11						ENSG00000127337.6
ENSG00000240591.1	ENSG00000147642.16			ENSG00000112977.15						ENSG00000135452.9
ENSG00000273000.5	ENSG00000138185.17			ENSG00000113163.15						ENSG00000139055.6
ENSG00000116957.12	ENSG00000149328.14			ENSG00000113282.13						ENSG00000139291.13
ENSG00000127423.10	ENSG00000160683.4			ENSG00000113327.14						ENSG00000139714.12
ENSG00000198625.12	ENSG00000283253.1			ENSG00000113369.8						ENSG00000149948.13
ENSG00000115816.14	ENSG00000142875.19			ENSG00000113391.17						ENSG00000150991.14
ENSG00000093183.13	ENSG00000153904.18			ENSG00000113575.9						ENSG00000166866.12
ENSG00000274810.3	ENSG00000152127.8			ENSG00000113578.17						ENSG00000174243.9
ENSG00000280571.1	ENSG00000158089.14			ENSG00000113732.8						ENSG00000178878.12
ENSG00000109686.17	ENSG00000159685.10			ENSG00000131711.14						ENSG00000179295.16
ENSG00000146007.10	ENSG00000181458.10			ENSG00000145592.13						ENSG00000196531.10
ENSG00000155545.19	ENSG00000164182.10			ENSG00000145675.14						ENSG00000198056.13
ENSG00000172262.11	ENSG00000204767.3			ENSG00000145687.16						ENSG00000198393.7
ENSG00000272772.1	ENSG00000164484.11			ENSG00000145721.11						ENSG00000258102.3
ENSG00000106554.11	ENSG00000106399.11			ENSG00000145743.15						ENSG00000065150.18
ENSG00000146963.17	ENSG00000219545.10			ENSG00000145780.7						ENSG00000102781.13
ENSG00000166526.16	ENSG00000165092.12			ENSG00000145860.11						ENSG00000133111.3
ENSG00000258677.2	ENSG00000067715.13			ENSG00000145920.14						ENSG00000136143.14
ENSG00000099219.13	ENSG00000139209.15			ENSG00000151292.17						ENSG00000022976.15
ENSG00000170903.10	ENSG00000155974.11			ENSG00000152377.13						ENSG00000100442.10
ENSG00000248643.5	ENSG00000139970.16			ENSG00000152422.15						ENSG00000100583.4
ENSG00000087470.17	ENSG00000171723.15			ENSG00000152932.7						ENSG00000100941.8
ENSG00000111445.13	ENSG00000181359.5			ENSG00000164327.12						ENSG00000125378.15
ENSG00000170633.16	ENSG00000248873.1			ENSG00000164330.16						ENSG00000129460.15
ENSG00000196465.10	ENSG00000225465.8			ENSG00000164574.15						ENSG00000129472.12
ENSG00000005812.10	ENSG00000143226.13			ENSG00000164588.6						ENSG00000165521.15
ENSG00000100865.14	ENSG00000174876.16			ENSG00000168246.5						ENSG00000187630.15
ENSG00000119685.19	ENSG00000170312.15			ENSG00000168944.15						ENSG00000196405.12
ENSG00000258653.3	ENSG00000169857.7			ENSG00000169862.18						ENSG00000197102.10
ENSG00000250021.7	ENSG00000153944.10			ENSG00000170091.10						ENSG00000205683.11
ENSG00000103544.14	ENSG00000169083.15			ENSG00000171530.13						ENSG00000092470.11
ENSG00000255439.6	ENSG00000181819.14			ENSG00000172795.15						ENSG00000104177.17
ENSG00000092931.11	ENSG00000184220.11			ENSG00000173545.4						ENSG00000128965.11
ENSG00000141458.12	ENSG00000138696.10			ENSG00000174132.8						ENSG00000136425.12
ENSG00000104852.14	ENSG00000131711.14			ENSG00000174695.9						ENSG00000137869.14
ENSG00000105072.8	ENSG00000184838.14			ENSG00000175426.10						ENSG00000138623.9
ENSG00000101473.16	ENSG00000112182.14			ENSG00000182132.13						ENSG00000140259.6
ENSG00000100226.15	ENSG00000196715.5			ENSG00000182836.9						ENSG00000140350.15
ENSG00000233369.7	ENSG00000104381.12			ENSG00000183580.9						ENSG00000140470.13
ENSG00000206149.10	ENSG00000179241.12			ENSG00000184349.12						ENSG00000140545.14
ENSG00000188599.17	ENSG00000048540.14			ENSG00000185305.10						ENSG00000156970.12
ENSG00000205534.6	ENSG00000133985.2			ENSG00000186479.4						ENSG00000166477.12
ENSG00000234478.1	ENSG00000173482.16			ENSG00000198961.9						ENSG00000166803.10
ENSG00000273637.1	ENSG00000249550.6			ENSG00000205089.7						ENSG00000166813.14
ENSG00000230530.1	ENSG00000169855.19			ENSG00000211445.11						ENSG00000166855.9
ENSG00000235016.1	ENSG00000138814.16			ENSG00000009844.15						ENSG00000169857.7
ENSG00000248664.1	ENSG00000153064.11			ENSG00000010818.8						ENSG00000174444.14
ENSG00000214783.9	ENSG00000124788.17			ENSG00000047579.19						ENSG00000178802.17
ENSG00000257379.1	ENSG00000005020.12			ENSG00000049618.22						ENSG00000182768.8
ENSG00000196696.12	ENSG00000136280.15			ENSG00000074706.13						ENSG00000185634.11
ENSG00000265408.1	ENSG00000158321.15			ENSG00000083123.14						ENSG00000187951.10
ENSG00000143740.14	ENSG00000156026.14			ENSG00000092820.17						ENSG00000198826.10
ENSG00000180488.14	ENSG00000134343.12			ENSG00000111880.15						ENSG00000007038.10
ENSG00000005436.13	ENSG00000169519.20			ENSG00000111897.6						ENSG00000048471.13
ENSG00000109381.19	ENSG00000133687.15			ENSG00000111962.7						ENSG00000058600.15
ENSG00000164168.7	ENSG00000105193.8			ENSG00000112031.15						ENSG00000063854.12
ENSG00000120306.9	ENSG00000185052.11			ENSG00000112242.14						ENSG00000090863.11
ENSG00000112200.16	ENSG00000271029.1			ENSG00000112245.9						ENSG00000103047.7
ENSG00000124541.6	ENSG00000232347.1			ENSG00000112319.17						ENSG00000103485.17
ENSG00000204130.12	ENSG00000145781.8			ENSG00000112406.4						ENSG00000118557.15
ENSG00000282246.1	ENSG00000106211.8			ENSG00000112562.18						ENSG00000140988.15
ENSG00000176148.15	ENSG00000147408.14			ENSG00000112578.9						ENSG00000153774.8
ENSG00000123297.17	ENSG00000155099.7			ENSG00000112679.14						ENSG00000157349.16
ENSG00000139437.17	ENSG00000123416.15			ENSG00000112697.15						ENSG00000168411.13
ENSG00000272921.1	ENSG00000186153.16			ENSG00000112699.10						ENSG00000176953.11
ENSG00000165819.11	ENSG00000064886.13			ENSG00000118496.4						ENSG00000180035.11
ENSG00000021776.10	ENSG00000143324.13			ENSG00000118689.14						ENSG00000260342.2
ENSG00000092531.9	ENSG00000198929.12			ENSG00000124615.17						ENSG00000277669.1
ENSG00000103061.12	ENSG00000143919.14			ENSG00000124782.19						ENSG00000073536.17
ENSG00000103510.19	ENSG00000171132.13			ENSG00000135549.14						ENSG00000074370.17
ENSG00000108433.15	ENSG00000091972.18			ENSG00000137166.14						ENSG00000087111.20
ENSG00000248871.1	ENSG00000182568.16			ENSG00000146072.6						ENSG00000094804.9
ENSG00000141452.9	ENSG00000145730.20			ENSG00000146221.9						ENSG00000108384.14
ENSG00000197857.13	ENSG00000112406.4			ENSG00000146263.11						ENSG00000108405.3
ENSG00000214046.8	ENSG00000147586.9			ENSG00000146352.12						ENSG00000108468.14
ENSG00000100099.20	ENSG00000106819.11			ENSG00000152818.18						ENSG00000108622.10
ENSG00000100242.15	ENSG00000147862.15			ENSG00000152894.14						ENSG00000108825.17
ENSG00000100412.15	ENSG00000165632.7			ENSG00000156639.11						ENSG00000129245.11
ENSG00000185721.11	ENSG00000023445.13			ENSG00000164484.11						ENSG00000131475.6
ENSG00000248751.6	ENSG00000132639.12			ENSG00000171408.13						ENSG00000131747.14
ENSG00000229358.3	ENSG00000260809.1			ENSG00000172348.14						ENSG00000132581.9
ENSG00000264538.6	ENSG00000253859.2			ENSG00000172673.10						ENSG00000132591.11
ENSG00000242086.8	ENSG00000114439.18			ENSG00000181315.10						ENSG00000133026.12
ENSG00000265479.6	ENSG00000172340.14			ENSG00000185345.18						ENSG00000133028.10
ENSG00000233144.1	ENSG00000169851.15			ENSG00000185760.15						ENSG00000141034.9
ENSG00000242288.9	ENSG00000112977.15			ENSG00000188580.13						ENSG00000141040.14
ENSG00000258964.1	ENSG00000119927.13			ENSG00000196821.9						ENSG00000141524.15
ENSG00000269243.1	ENSG00000023697.12			ENSG00000204569.9						ENSG00000167851.13
ENSG00000253352.8	ENSG00000075415.12			ENSG00000213760.10						ENSG00000167895.14
ENSG00000162413.16	ENSG00000140443.13			ENSG00000214113.10						ENSG00000170037.13
ENSG00000178074.5	ENSG00000126860.11			ENSG00000224531.5						ENSG00000170175.10
ENSG00000182903.15	ENSG00000054611.13			ENSG00000254870.5						ENSG00000170832.12
ENSG00000198301.11	ENSG00000156298.12			ENSG00000005020.12						ENSG00000172716.16
ENSG00000164253.13	ENSG00000021826.14			ENSG00000006451.7						ENSG00000178921.13
ENSG00000178338.10	ENSG00000114861.18			ENSG00000010270.13						ENSG00000182481.8
ENSG00000137413.15	ENSG00000152601.17			ENSG00000015676.17						ENSG00000182628.12
ENSG00000271793.1	ENSG00000157445.14			ENSG00000058091.16						ENSG00000188612.11
ENSG00000091127.13	ENSG00000203727.3			ENSG00000064393.15						ENSG00000198242.13
ENSG00000147421.17	ENSG00000198839.9			ENSG00000071189.21						ENSG00000213246.6
ENSG00000122741.15	ENSG00000147677.10			ENSG00000075223.13						ENSG00000266967.6
ENSG00000136940.13	ENSG00000175806.14			ENSG00000105887.10						ENSG00000075336.11
ENSG00000249967.1	ENSG00000178764.7			ENSG00000105894.11						ENSG00000081923.11
ENSG00000118096.7	ENSG00000153774.8			ENSG00000105926.15						ENSG00000265681.7
ENSG00000167986.13	ENSG00000176641.10			ENSG00000106069.20						ENSG00000065717.14
ENSG00000255663.1	ENSG00000100316.15			ENSG00000106089.11						ENSG00000074181.8
ENSG00000111450.13	ENSG00000101846.6			ENSG00000106299.7						ENSG00000104805.15
ENSG00000120699.12	ENSG00000147010.17			ENSG00000106399.11						ENSG00000104907.12
ENSG00000169062.14	ENSG00000171004.17			ENSG00000106536.19						ENSG00000105122.12
ENSG00000119684.15	ENSG00000179766.18			ENSG00000106546.12						ENSG00000105135.15
ENSG00000104133.14	ENSG00000255737.2			ENSG00000106571.12						ENSG00000105171.9
ENSG00000249240.2	ENSG00000121964.14			ENSG00000122515.14						ENSG00000105281.12
ENSG00000065427.14	ENSG00000144036.15			ENSG00000122584.12						ENSG00000105364.13
ENSG00000261717.5	ENSG00000124406.16			ENSG00000122591.11						ENSG00000105401.7
ENSG00000282034.1	ENSG00000154447.14			ENSG00000128573.23						ENSG00000105612.8
ENSG00000074356.16	ENSG00000178425.13			ENSG00000130226.16						ENSG00000105708.8
ENSG00000132383.11	ENSG00000107263.18			ENSG00000131558.14						ENSG00000125657.4
ENSG00000011243.17	ENSG00000156110.13			ENSG00000133627.17						ENSG00000126934.13
ENSG00000105127.8	ENSG00000134138.19			ENSG00000136205.16						ENSG00000129347.19
ENSG00000167232.13	ENSG00000140285.9			ENSG00000136267.13						ENSG00000130175.9
ENSG00000267001.1	ENSG00000260027.4			ENSG00000136270.13						ENSG00000132010.15
ENSG00000267059.2	ENSG00000124225.15			ENSG00000136280.15						ENSG00000142002.16
ENSG00000157617.16	ENSG00000182463.15			ENSG00000146648.16						ENSG00000142552.7
ENSG00000160299.16	ENSG00000100142.14			ENSG00000153814.11						ENSG00000161277.10
ENSG00000276612.3	ENSG00000146938.14			ENSG00000155849.15						ENSG00000167613.15
ENSG00000100413.16	ENSG00000069702.10			ENSG00000157219.3						ENSG00000167670.15
ENSG00000242259.8	ENSG00000124374.8			ENSG00000158560.14						ENSG00000167674.14
ENSG00000152117.17	ENSG00000144218.18			ENSG00000164603.11						ENSG00000167775.10
ENSG00000078319.8	ENSG00000163082.9			ENSG00000170027.6						ENSG00000172009.14
ENSG00000185710.9	ENSG00000198648.10			ENSG00000173114.12						ENSG00000179262.9
ENSG00000236723.2	ENSG00000221823.10			ENSG00000173452.13						ENSG00000184162.14
ENSG00000234945.7	ENSG00000151012.13			ENSG00000179603.17						ENSG00000187994.13
ENSG00000274629.1	ENSG00000172403.10			ENSG00000183166.10						ENSG00000196365.11
ENSG00000269968.1	ENSG00000145819.15			ENSG00000184408.9						ENSG00000256229.7
ENSG00000267009.6	ENSG00000221914.8			ENSG00000184863.10						ENSG00000275395.4
ENSG00000117408.10	ENSG00000157837.15			ENSG00000185274.11						ENSG00000276043.4
ENSG00000126106.13	ENSG00000167552.13			ENSG00000196367.12						ENSG00000089048.14
ENSG00000143164.15	ENSG00000127152.17			ENSG00000196511.13						ENSG00000089123.15
ENSG00000154305.16	ENSG00000277669.1			ENSG00000196636.7						ENSG00000101004.14
ENSG00000197056.9	ENSG00000160219.11			ENSG00000196937.10						ENSG00000101350.7
ENSG00000197780.9	ENSG00000243775.2			ENSG00000198839.9						ENSG00000125967.16
ENSG00000265241.6	ENSG00000172456.17			ENSG00000198898.12						ENSG00000126001.15
ENSG00000266338.6	ENSG00000235750.9			ENSG00000219545.10						ENSG00000168734.13
ENSG00000116001.15	ENSG00000144642.21			ENSG00000274523.4						ENSG00000159259.7
ENSG00000138074.14	ENSG00000151090.17			ENSG00000008988.9						ENSG00000185437.13
ENSG00000144381.16	ENSG00000109674.3			ENSG00000091879.13						ENSG00000015475.18
ENSG00000172046.18	ENSG00000150630.3			ENSG00000104331.8						ENSG00000100097.11
ENSG00000037749.11	ENSG00000168772.10			ENSG00000104388.14						ENSG00000100401.19
ENSG00000112996.10	ENSG00000026297.15			ENSG00000104435.13						ENSG00000128340.14
ENSG00000137216.18	ENSG00000187391.19			ENSG00000104447.11						ENSG00000133454.15
ENSG00000270800.1	ENSG00000169122.11			ENSG00000104490.17						ENSG00000138964.16
ENSG00000272968.5	ENSG00000180694.13			ENSG00000104643.9						ENSG00000180957.17
ENSG00000123124.13	ENSG00000102572.14			ENSG00000104765.15						ENSG00000196419.12
ENSG00000129691.15	ENSG00000137869.14			ENSG00000120526.10						ENSG00000101972.18
ENSG00000147679.11	ENSG00000141574.7			ENSG00000120889.12						ENSG00000101997.12
ENSG00000152465.17	ENSG00000258315.5			ENSG00000132294.14						ENSG00000102144.13
ENSG00000256514.1	ENSG00000179981.9			ENSG00000140396.12						ENSG00000102158.19
ENSG00000283396.1	ENSG00000213988.9			ENSG00000147588.6						ENSG00000102241.11
ENSG00000273167.1	ENSG00000196656.7			ENSG00000147650.11						ENSG00000125354.22
ENSG00000140006.11	ENSG00000075420.12			ENSG00000147655.10						ENSG00000126945.8
ENSG00000128829.11	ENSG00000114388.12			ENSG00000147677.10						ENSG00000130741.10
ENSG00000140299.11	ENSG00000173926.5			ENSG00000153317.14						ENSG00000147010.17
ENSG00000140632.16	ENSG00000083123.14			ENSG00000154188.9						ENSG00000147202.17
ENSG00000125447.16	ENSG00000112414.14			ENSG00000155099.7						ENSG00000147255.18
ENSG00000125695.12	ENSG00000185760.15			ENSG00000156011.16						ENSG00000173674.10
ENSG00000141568.20	ENSG00000105974.11			ENSG00000164929.16						ENSG00000180879.13
ENSG00000146872.17	ENSG00000104435.13			ENSG00000169139.11						ENSG00000181544.13
ENSG00000128789.20	ENSG00000153310.18			ENSG00000169439.11						ENSG00000184216.12
ENSG00000064607.16	ENSG00000134954.14			ENSG00000169946.13						ENSG00000241343.9
ENSG00000083828.15	ENSG00000123094.15			ENSG00000171033.12						ENSG00000269226.7
ENSG00000198131.13	ENSG00000122042.9			ENSG00000171316.11						ENSG00000160766.14
ENSG00000198466.11	ENSG00000139737.21			ENSG00000172164.13						ENSG00000218358.2
ENSG00000198538.10	ENSG00000076716.8			ENSG00000173334.3						ENSG00000225418.1
ENSG00000100023.18	ENSG00000131831.17			ENSG00000176406.21						ENSG00000261377.5
ENSG00000251357.4	ENSG00000151414.14			ENSG00000177570.13						ENSG00000257267.2
ENSG00000214765.8	ENSG00000162989.4			ENSG00000182197.10						ENSG00000263006.6
ENSG00000176700.19	ENSG00000163359.15			ENSG00000198363.16						ENSG00000227755.1
ENSG00000247828.7	ENSG00000145012.12			ENSG00000221914.8						ENSG00000226715.2
ENSG00000281021.1	ENSG00000163513.17			ENSG00000253457.2						ENSG00000235522.6
ENSG00000213599.10	ENSG00000163923.9			ENSG00000275342.4						ENSG00000251580.1
ENSG00000267062.1	ENSG00000109586.11			ENSG00000080298.15						ENSG00000253738.1
ENSG00000120948.15	ENSG00000145703.15			ENSG00000106829.18						ENSG00000235298.1
ENSG00000142856.16	ENSG00000083099.10			ENSG00000107262.17						ENSG00000282772.1
ENSG00000143093.14	ENSG00000076641.4			ENSG00000107282.7						ENSG00000255449.1
ENSG00000171824.13	ENSG00000134532.15			ENSG00000107295.9						ENSG00000256028.2
ENSG00000115084.12	ENSG00000141337.12			ENSG00000107338.9						ENSG00000277734.6
ENSG00000115514.11	ENSG00000168675.18			ENSG00000107372.12						ENSG00000264577.1
ENSG00000121988.17	ENSG00000169891.17			ENSG00000119318.12						ENSG00000274333.4
ENSG00000196290.14	ENSG00000244137.1			ENSG00000119487.16						ENSG00000276077.4
ENSG00000258984.5	ENSG00000117009.11			ENSG00000119522.16
ENSG00000093167.17	ENSG00000138430.15			ENSG00000130723.17
ENSG00000180376.16	ENSG00000218336.8			ENSG00000135018.13
ENSG00000255154.7	ENSG00000112357.12			ENSG00000136897.7
ENSG00000189308.10	ENSG00000198478.7			ENSG00000136928.6
ENSG00000096433.10	ENSG00000241370.5			ENSG00000148082.9
ENSG00000132424.14	ENSG00000075223.13			ENSG00000153707.16
ENSG00000170734.11	ENSG00000242265.5			ENSG00000156052.10
ENSG00000259305.6	ENSG00000104388.14			ENSG00000157657.14
ENSG00000119392.14	ENSG00000149273.14			ENSG00000167081.16
ENSG00000165115.14	ENSG00000166326.6			ENSG00000172159.15
ENSG00000130640.13	ENSG00000184613.10			ENSG00000174482.10
ENSG00000172922.8	ENSG00000134769.21			ENSG00000188647.12
ENSG00000186318.16	ENSG00000152217.16			ENSG00000198121.13
ENSG00000051825.14	ENSG00000235290.1			ENSG00000204352.2
ENSG00000088986.10	ENSG00000253741.1			ENSG00000283263.1
ENSG00000135392.15	ENSG00000250742.2			ENSG00000095787.21
ENSG00000267281.2	ENSG00000213626.11			ENSG00000107560.10
ENSG00000272822.1	ENSG00000109452.12			ENSG00000108061.11
ENSG00000196199.13	ENSG00000153046.17			ENSG00000108091.10
ENSG00000092098.16	ENSG00000104343.19			ENSG00000108175.16
ENSG00000100813.14	ENSG00000203867.7			ENSG00000108219.14
ENSG00000157450.15	ENSG00000165895.17			ENSG00000119917.13
ENSG00000260007.2	ENSG00000141429.13			ENSG00000119953.12
ENSG00000103091.14	ENSG00000198258.10			ENSG00000136738.14
ENSG00000140992.18	ENSG00000130638.15			ENSG00000136750.11
ENSG00000183889.12	ENSG00000129682.14			ENSG00000148516.21
ENSG00000260272.1	ENSG00000229161.2			ENSG00000148655.14
ENSG00000070540.12	ENSG00000259053.1			ENSG00000148680.15
ENSG00000166260.10	ENSG00000118217.5			ENSG00000148737.16
ENSG00000167720.12	ENSG00000183508.4			ENSG00000150275.17
ENSG00000182473.21	ENSG00000143797.11			ENSG00000150347.14
ENSG00000261915.6	ENSG00000143995.19			ENSG00000151532.13
ENSG00000011451.17	ENSG00000170035.15			ENSG00000152782.16
ENSG00000130816.14	ENSG00000051596.9			ENSG00000156026.14
ENSG00000189144.13	ENSG00000112679.14			ENSG00000156395.12
ENSG00000020256.19	ENSG00000106392.10			ENSG00000165632.7
ENSG00000131051.21	ENSG00000147324.10			ENSG00000165650.11
ENSG00000258366.7	ENSG00000107295.9			ENSG00000165985.9
ENSG00000159131.16	ENSG00000165650.11			ENSG00000166167.17
ENSG00000159256.12	ENSG00000033327.12			ENSG00000171862.9
ENSG00000205758.11	ENSG00000184226.14			ENSG00000172987.12
ENSG00000204177.10	ENSG00000204899.5			ENSG00000175029.16
ENSG00000242338.6	ENSG00000166974.12			ENSG00000183049.12
ENSG00000263142.5	ENSG00000124126.13			ENSG00000185737.12
ENSG00000229044.1	ENSG00000169184.5			ENSG00000198873.11
ENSG00000223642.7	ENSG00000188859.6			ENSG00000283496.1
ENSG00000246859.2	ENSG00000153823.18			ENSG00000026508.16
ENSG00000251136.8	ENSG00000178568.14			ENSG00000109917.10
ENSG00000225484.6	ENSG00000163536.12			ENSG00000110218.8
ENSG00000237017.1	ENSG00000164258.11			ENSG00000110436.11
ENSG00000158828.6	ENSG00000145982.11			ENSG00000123901.8
ENSG00000268043.7	ENSG00000196284.14			ENSG00000134343.12
ENSG00000283580.1	ENSG00000158560.14			ENSG00000134909.18
ENSG00000144029.11	ENSG00000230626.4			ENSG00000134954.14
ENSG00000041802.10	ENSG00000254087.7			ENSG00000137693.13
ENSG00000236699.8	ENSG00000119138.4			ENSG00000149256.15
ENSG00000049860.13	ENSG00000205339.9			ENSG00000149328.14
ENSG00000160908.14	ENSG00000139438.5			ENSG00000150672.16
ENSG00000178125.14	ENSG00000139679.15			ENSG00000151498.11
ENSG00000198791.11	ENSG00000100647.7			ENSG00000162188.5
ENSG00000251349.3	ENSG00000198795.10			ENSG00000165895.17
ENSG00000272896.1	ENSG00000157514.16			ENSG00000165973.18
ENSG00000089876.11	ENSG00000215861.5			ENSG00000166025.17
ENSG00000148606.12	ENSG00000143337.18			ENSG00000166326.6
ENSG00000162222.13	ENSG00000049323.15			ENSG00000166436.15
ENSG00000002016.17	ENSG00000085978.21			ENSG00000168000.14
ENSG00000258064.1	ENSG00000163219.11			ENSG00000168539.3
ENSG00000258644.5	ENSG00000170417.14			ENSG00000169519.20
ENSG00000258790.1	ENSG00000138463.8			ENSG00000170242.17
ENSG00000275674.1	ENSG00000177565.16			ENSG00000170962.12
ENSG00000007392.16	ENSG00000138698.14			ENSG00000174516.14
ENSG00000166451.13	ENSG00000146072.6			ENSG00000178105.9
ENSG00000182149.20	ENSG00000224531.5			ENSG00000186174.12
ENSG00000233024.7	ENSG00000156011.16			ENSG00000186660.14
ENSG00000005156.11	ENSG00000188229.5			ENSG00000196323.11
ENSG00000011295.15	ENSG00000151532.13			ENSG00000197702.11
ENSG00000141699.10	ENSG00000180628.14			ENSG00000205339.9
ENSG00000176155.18	ENSG00000149212.11			ENSG00000214517.9
ENSG00000251537.4	ENSG00000178105.9			ENSG00000234857.2
ENSG00000141428.16	ENSG00000111215.11			ENSG00000255245.4
ENSG00000196417.12	ENSG00000204442.3			ENSG00000008394.12
ENSG00000267740.5	ENSG00000240972.1			ENSG00000010292.12
ENSG00000147133.15	ENSG00000204434.5			ENSG00000048540.14
ENSG00000147403.16	ENSG00000117586.10			ENSG00000049130.13
ENSG00000251079.6	ENSG00000159377.10			ENSG00000067715.13
ENSG00000215154.6	ENSG00000162434.11			ENSG00000075415.12
ENSG00000272578.5	ENSG00000185483.11			ENSG00000089169.14
ENSG00000223745.7	ENSG00000078018.19			ENSG00000092841.18
ENSG00000240254.1	ENSG00000119866.20			ENSG00000111058.7
ENSG00000264578.1	ENSG00000152128.13			ENSG00000111215.11
ENSG00000223482.7	ENSG00000168894.9			ENSG00000111305.18
ENSG00000219410.5	ENSG00000171863.12			ENSG00000111371.15
ENSG00000247228.2	ENSG00000187957.7			ENSG00000111404.6
ENSG00000260111.1	ENSG00000132394.10			ENSG00000111696.11
ENSG00000270580.5	ENSG00000175928.5			ENSG00000123066.7
ENSG00000049245.12	ENSG00000043462.11			ENSG00000123106.10
ENSG00000116560.10	ENSG00000079215.13			ENSG00000130035.6
ENSG00000160072.19	ENSG00000113273.15			ENSG00000134294.13
ENSG00000176261.15	ENSG00000170915.8			ENSG00000135447.16
ENSG00000176444.18	ENSG00000283553.1			ENSG00000135452.9
ENSG00000187144.11	ENSG00000106415.12			ENSG00000135655.14
ENSG00000010322.15	ENSG00000104341.16			ENSG00000139083.10
ENSG00000114857.17	ENSG00000123119.11			ENSG00000139163.15
ENSG00000145041.15	ENSG00000147650.11			ENSG00000139190.16
ENSG00000206562.11	ENSG00000107105.14			ENSG00000139718.10
ENSG00000168538.15	ENSG00000188312.13			ENSG00000151491.12
ENSG00000112983.17	ENSG00000150347.14			ENSG00000155980.11
ENSG00000161011.19	ENSG00000137502.9			ENSG00000161813.21
ENSG00000130024.14	ENSG00000123360.11			ENSG00000173064.11
ENSG00000154710.15	ENSG00000120675.5			ENSG00000173598.13
ENSG00000164828.17	ENSG00000129636.12			ENSG00000174106.2
ENSG00000166529.14	ENSG00000120093.11			ENSG00000174437.16
ENSG00000148399.12	ENSG00000154229.11			ENSG00000175197.11
ENSG00000119929.12	ENSG00000101412.12			ENSG00000177425.10
ENSG00000152457.17	ENSG00000235522.6			ENSG00000184613.10
ENSG00000152944.8	ENSG00000152061.23			ENSG00000186908.14
ENSG00000165506.14	ENSG00000162511.7			ENSG00000187778.13
ENSG00000187097.12	ENSG00000183831.6			ENSG00000196850.5
ENSG00000198690.9	ENSG00000186197.13			ENSG00000196935.8
ENSG00000167264.17	ENSG00000237763.9			ENSG00000198673.10
ENSG00000183426.16	ENSG00000068784.12			ENSG00000212127.5
ENSG00000108561.8	ENSG00000172985.10			ENSG00000273079.5
ENSG00000125686.11	ENSG00000187736.12			ENSG00000275778.1
ENSG00000141219.15	ENSG00000163947.11			ENSG00000083642.18
ENSG00000180329.13	ENSG00000145375.7			ENSG00000102572.14
ENSG00000267228.6	ENSG00000170231.15			ENSG00000102804.14
ENSG00000160961.11	ENSG00000079102.16			ENSG00000118922.17
ENSG00000171570.10	ENSG00000106809.10			ENSG00000120675.5
ENSG00000267120.3	ENSG00000148362.10			ENSG00000122042.9
ENSG00000269547.1	ENSG00000185737.12			ENSG00000132970.12
ENSG00000130702.14	ENSG00000132286.11			ENSG00000133121.20
ENSG00000272897.5	ENSG00000151702.16			ENSG00000134882.15
ENSG00000184708.17	ENSG00000111058.7			ENSG00000139514.12
ENSG00000239883.8	ENSG00000126821.7			ENSG00000139679.15
ENSG00000214176.9	ENSG00000151322.18			ENSG00000139734.17
ENSG00000231851.5	ENSG00000165821.11			ENSG00000139826.5
ENSG00000271816.1	ENSG00000225705.2			ENSG00000152484.13
ENSG00000272140.2	ENSG00000283117.1			ENSG00000169508.6
ENSG00000267002.2	ENSG00000260664.2			ENSG00000183098.10
ENSG00000186019.10	ENSG00000117595.10			ENSG00000185352.8
ENSG00000031698.12	ENSG00000162631.18			ENSG00000198824.5
ENSG00000119285.10	ENSG00000138378.17			ENSG00000204899.5
ENSG00000131584.18	ENSG00000144959.9			ENSG00000276644.4
ENSG00000143479.15	ENSG00000163606.10			ENSG00000020577.13
ENSG00000154222.14	ENSG00000181722.16			ENSG00000092199.17
ENSG00000162408.10	ENSG00000138795.9			ENSG00000100614.17
ENSG00000059728.10	ENSG00000174749.5			ENSG00000100941.8
ENSG00000082146.12	ENSG00000156475.18			ENSG00000139970.16
ENSG00000115239.21	ENSG00000170091.10			ENSG00000139977.13
ENSG00000162980.16	ENSG00000047579.19			ENSG00000139990.17
ENSG00000113971.18	ENSG00000137393.9			ENSG00000151320.10
ENSG00000161203.13	ENSG00000171408.13			ENSG00000154001.13
ENSG00000163378.13	ENSG00000105887.10			ENSG00000165502.6
ENSG00000163512.13	ENSG00000164761.8			ENSG00000168952.15
ENSG00000164068.15	ENSG00000189319.13			ENSG00000186469.8
ENSG00000172888.11	ENSG00000149177.12			ENSG00000197045.12
ENSG00000272741.1	ENSG00000008405.11			ENSG00000211448.11
ENSG00000282278.1	ENSG00000134882.15			ENSG00000227051.6
ENSG00000087087.18	ENSG00000213145.9			ENSG00000250366.2
ENSG00000106263.17	ENSG00000131873.5			ENSG00000258643.5
ENSG00000126870.15	ENSG00000065559.14			ENSG00000103769.9
ENSG00000085788.13	ENSG00000049759.17			ENSG00000103966.10
ENSG00000104450.12	ENSG00000130540.13			ENSG00000104059.4
ENSG00000147576.15	ENSG00000152931.7			ENSG00000134138.19
ENSG00000256966.6	ENSG00000121481.10			ENSG00000137766.16
ENSG00000214655.10	ENSG00000163564.14			ENSG00000137872.16
ENSG00000225830.11	ENSG00000115758.12			ENSG00000137876.9
ENSG00000172757.12	ENSG00000128656.13			ENSG00000140262.17
ENSG00000177030.16	ENSG00000188687.16			ENSG00000140332.15
ENSG00000151135.9	ENSG00000013297.10			ENSG00000140443.13
ENSG00000166598.13	ENSG00000170917.13			ENSG00000166068.12
ENSG00000258311.5	ENSG00000112902.11			ENSG00000166557.12
ENSG00000182979.17	ENSG00000096060.14			ENSG00000166922.8
ENSG00000203485.12	ENSG00000146263.11			ENSG00000169918.9
ENSG00000259522.2	ENSG00000164649.19			ENSG00000171262.11
ENSG00000273025.1	ENSG00000175600.15			ENSG00000171914.15
ENSG00000158805.11	ENSG00000172159.15			ENSG00000173517.10
ENSG00000269881.1	ENSG00000148680.15			ENSG00000181827.14
ENSG00000272617.2	ENSG00000166575.16			ENSG00000184254.16
ENSG00000281348.1	ENSG00000167995.15			ENSG00000185442.12
ENSG00000283182.1	ENSG00000111371.15			ENSG00000185787.14
ENSG00000007047.14	ENSG00000188488.13			ENSG00000186073.11
ENSG00000104885.17	ENSG00000007237.18			ENSG00000187951.10
ENSG00000105483.16	ENSG00000198157.10			ENSG00000188467.10
ENSG00000268133.1	ENSG00000115896.15			ENSG00000273540.2
ENSG00000269469.1	ENSG00000169764.14			ENSG00000006116.3
ENSG00000101190.12	ENSG00000158258.16			ENSG00000078328.19
ENSG00000100425.18	ENSG00000086300.15			ENSG00000099365.9
ENSG00000270231.3	ENSG00000106546.12			ENSG00000103460.16
ENSG00000229018.5	ENSG00000158623.14			ENSG00000122254.6
ENSG00000165121.11	ENSG00000091656.15			ENSG00000131149.18
ENSG00000250251.6	ENSG00000104324.15			ENSG00000140718.19
ENSG00000240571.1	ENSG00000104447.11			ENSG00000150394.13
ENSG00000245025.2	ENSG00000107282.7			ENSG00000153774.8
ENSG00000251143.1	ENSG00000198879.11			ENSG00000153815.16
ENSG00000259544.1	ENSG00000137509.10			ENSG00000154118.12
ENSG00000260281.5	ENSG00000148948.7			ENSG00000169181.12
ENSG00000267048.1	ENSG00000118596.11			ENSG00000171724.2
ENSG00000116198.12	ENSG00000126838.9			ENSG00000182601.6
ENSG00000116497.17	ENSG00000108984.13			ENSG00000182831.11
ENSG00000121957.12	ENSG00000158470.5			ENSG00000184602.5
ENSG00000143379.12	ENSG00000236319.2			ENSG00000185947.14
ENSG00000177000.10	ENSG00000121905.9			ENSG00000188215.9
ENSG00000221978.11	ENSG00000143156.13			ENSG00000259784.1
ENSG00000271810.5	ENSG00000178796.12			ENSG00000261609.4
ENSG00000134330.18	ENSG00000197147.12			ENSG00000280893.1
ENSG00000153165.18	ENSG00000055813.5			ENSG00000006125.16
ENSG00000168395.15	ENSG00000115935.17			ENSG00000006695.10
ENSG00000173209.22	ENSG00000074416.13			ENSG00000007237.18
ENSG00000270757.1	ENSG00000172020.12			ENSG00000065559.14
ENSG00000153551.13	ENSG00000164035.9			ENSG00000073969.18
ENSG00000121892.14	ENSG00000170153.10			ENSG00000087095.12
ENSG00000159692.15	ENSG00000061455.10			ENSG00000087152.15
ENSG00000152942.18	ENSG00000158458.19			ENSG00000091592.15
ENSG00000197451.11	ENSG00000164494.11			ENSG00000108829.9
ENSG00000013375.15	ENSG00000234745.9			ENSG00000108848.15
ENSG00000112159.11	ENSG00000106025.8			ENSG00000126368.5
ENSG00000124608.4	ENSG00000136205.16			ENSG00000126653.16
ENSG00000130023.15	ENSG00000180233.10			ENSG00000126860.11
ENSG00000106261.16	ENSG00000108091.10			ENSG00000126861.4
ENSG00000161057.10	ENSG00000151151.5			ENSG00000132510.10
ENSG00000107890.16	ENSG00000183049.12			ENSG00000136504.11
ENSG00000138107.12	ENSG00000152767.16			ENSG00000141376.21
ENSG00000177853.14	ENSG00000140807.6			ENSG00000141505.11
ENSG00000110274.14	ENSG00000130748.6			ENSG00000141576.14
ENSG00000135372.8	ENSG00000182240.15			ENSG00000154229.11
ENSG00000197798.8	ENSG00000047648.21			ENSG00000154975.13
ENSG00000198707.14	ENSG00000130962.17			ENSG00000169710.8
ENSG00000133114.17	ENSG00000249506.3			ENSG00000170004.16
ENSG00000165501.16	ENSG00000171488.14			ENSG00000183010.16
ENSG00000179364.13	ENSG00000172380.5			ENSG00000220205.8
ENSG00000067369.13	ENSG00000134108.12			ENSG00000258315.5
ENSG00000260916.6	ENSG00000181744.8			ENSG00000263620.1
ENSG00000102901.12	ENSG00000145335.15			ENSG00000091157.13
ENSG00000175595.14	ENSG00000176049.15			ENSG00000101558.13
ENSG00000108474.16	ENSG00000215218.3			ENSG00000101577.9
ENSG00000108592.16	ENSG00000112531.16			ENSG00000101746.15
ENSG00000185722.16	ENSG00000106617.13			ENSG00000134030.13
ENSG00000225190.9	ENSG00000140396.12			ENSG00000141622.13
ENSG00000088247.16	ENSG00000184156.15			ENSG00000167220.11
ENSG00000161091.12	ENSG00000111335.12			ENSG00000170579.15
ENSG00000026036.21	ENSG00000120658.13			ENSG00000173482.16
ENSG00000149474.13	ENSG00000139793.18			ENSG00000176641.10
ENSG00000160305.17	ENSG00000140025.15			ENSG00000177150.12
ENSG00000165240.18	ENSG00000198807.12			ENSG00000179981.9
ENSG00000276291.5	ENSG00000211448.11			ENSG00000196628.14
ENSG00000243406.6	ENSG00000153815.16			ENSG00000197971.14
ENSG00000180747.15	ENSG00000006695.10			ENSG00000198795.10
ENSG00000257122.5	ENSG00000197971.14			ENSG00000206052.10
ENSG00000274602.4	ENSG00000142192.20			ENSG00000215421.9
ENSG00000228830.1	ENSG00000197381.15			ENSG00000005007.12
ENSG00000272980.4	ENSG00000245768.6			ENSG00000074842.7
ENSG00000272752.6	ENSG00000232512.6			ENSG00000105270.14
ENSG00000224597.9	ENSG00000078900.14			ENSG00000105568.17
ENSG00000254929.6	ENSG00000134184.12			ENSG00000105662.15
ENSG00000254873.1	ENSG00000125637.15			ENSG00000121297.6
ENSG00000255467.1	ENSG00000144278.14			ENSG00000130255.12
ENSG00000260669.2	ENSG00000158019.20			ENSG00000141867.17
ENSG00000173867.9	ENSG00000121440.14			ENSG00000160396.8
ENSG00000259678.1	ENSG00000152952.11			ENSG00000167491.17
ENSG00000263917.1	ENSG00000080493.14			ENSG00000167654.17
ENSG00000235513.1	ENSG00000145365.10			ENSG00000169021.5
ENSG00000078808.16	ENSG00000113048.16			ENSG00000053438.8
ENSG00000116688.16	ENSG00000183580.9			ENSG00000089006.16
ENSG00000116977.18	ENSG00000112290.12			ENSG00000101126.15
ENSG00000117450.13	ENSG00000152894.14			ENSG00000101333.16
ENSG00000117616.17	ENSG00000022567.9			ENSG00000101363.12
ENSG00000162601.9	ENSG00000169439.11			ENSG00000101421.3
ENSG00000013441.15	ENSG00000107020.9			ENSG00000101452.14
ENSG00000115368.9	ENSG00000110218.8			ENSG00000124134.8
ENSG00000144026.11	ENSG00000157570.11			ENSG00000124145.6
ENSG00000158411.10	ENSG00000111110.11			ENSG00000124164.15
ENSG00000016864.17	ENSG00000174106.2			ENSG00000124225.15
ENSG00000076242.14	ENSG00000183032.11			ENSG00000125814.17
ENSG00000144747.15	ENSG00000227051.6			ENSG00000125844.15
ENSG00000085231.13	ENSG00000140262.17			ENSG00000125851.9
ENSG00000120256.9	ENSG00000103187.7			ENSG00000125868.15
ENSG00000204344.14	ENSG00000196502.11			ENSG00000132639.12
ENSG00000128595.16	ENSG00000124164.15			ENSG00000132640.14
ENSG00000136243.16	ENSG00000154645.13			ENSG00000158470.5
ENSG00000146909.7	ENSG00000130021.13			ENSG00000166913.12
ENSG00000070610.14	ENSG00000223951.1			ENSG00000171867.16
ENSG00000127080.9	ENSG00000216863.9			ENSG00000172264.16
ENSG00000148396.18	ENSG00000221857.7			ENSG00000182463.15
ENSG00000165684.4	ENSG00000117528.11			ENSG00000182621.17
ENSG00000197579.7	ENSG00000135750.14			ENSG00000185052.11
ENSG00000198000.11	ENSG00000168542.13			ENSG00000196090.12
ENSG00000060339.13	ENSG00000151967.18			ENSG00000142192.20
ENSG00000122882.10	ENSG00000170293.8			ENSG00000142207.6
ENSG00000165646.11	ENSG00000145349.16			ENSG00000156304.14
ENSG00000165732.12	ENSG00000163110.14			ENSG00000157540.19
ENSG00000227345.8	ENSG00000069020.18			ENSG00000157542.9
ENSG00000175575.12	ENSG00000170624.13			ENSG00000180530.10
ENSG00000078246.16	ENSG00000184347.14			ENSG00000183036.10
ENSG00000111780.8	ENSG00000155093.17			ENSG00000197381.15
ENSG00000139725.7	ENSG00000169139.11			ENSG00000198743.6
ENSG00000170581.13	ENSG00000080298.15			ENSG00000099995.18
ENSG00000132950.18	ENSG00000198964.13			ENSG00000100095.18
ENSG00000134897.13	ENSG00000078124.11			ENSG00000100142.14
ENSG00000126773.12	ENSG00000085117.11			ENSG00000100285.9
ENSG00000104129.9	ENSG00000130592.14			ENSG00000100316.15
ENSG00000185829.16	ENSG00000049130.13			ENSG00000128250.5
ENSG00000258890.6	ENSG00000130035.6			ENSG00000130638.15
ENSG00000079134.11	ENSG00000136052.9			ENSG00000180957.17
ENSG00000269026.2	ENSG00000179104.8			ENSG00000003096.13
ENSG00000125779.21	ENSG00000150907.7			ENSG00000008056.12
ENSG00000198026.7	ENSG00000103769.9			ENSG00000011677.12
ENSG00000249209.2	ENSG00000166073.9			ENSG00000076716.8
ENSG00000225648.5	ENSG00000167971.15			ENSG00000086758.15
ENSG00000226232.8	ENSG00000240003.2			ENSG00000094841.13
ENSG00000233937.6	ENSG00000245662.2			ENSG00000101846.6
ENSG00000262136.1	ENSG00000162733.16			ENSG00000101849.15
ENSG00000267575.6	ENSG00000115828.15			ENSG00000101871.14
ENSG00000000457.13	ENSG00000118263.14			ENSG00000101958.13
ENSG00000007341.18	ENSG00000153250.18			ENSG00000126733.20
ENSG00000116580.18	ENSG00000090530.9			ENSG00000129682.14
ENSG00000121940.15	ENSG00000114698.14			ENSG00000130021.13
ENSG00000188529.14	ENSG00000145864.12			ENSG00000131089.14
ENSG00000136699.19	ENSG00000145920.14			ENSG00000131263.12
ENSG00000138029.13	ENSG00000164176.12			ENSG00000131831.17
ENSG00000138081.20	ENSG00000112137.17			ENSG00000147246.9
ENSG00000273398.6	ENSG00000153993.13			ENSG00000156298.12
ENSG00000011198.7	ENSG00000257923.9			ENSG00000157600.11
ENSG00000161217.11	ENSG00000106799.12			ENSG00000157625.15
ENSG00000155275.18	ENSG00000147905.17			ENSG00000158813.17
ENSG00000164038.14	ENSG00000198121.13			ENSG00000165194.15
ENSG00000113240.12	ENSG00000107438.8			ENSG00000165675.16
ENSG00000113761.11	ENSG00000148842.17			ENSG00000169083.15
ENSG00000145912.8	ENSG00000156113.21			ENSG00000169100.13
ENSG00000180104.15	ENSG00000184719.11			ENSG00000173674.10
ENSG00000118412.12	ENSG00000183715.13			ENSG00000184911.14
ENSG00000280148.1	ENSG00000021645.18			ENSG00000188419.13
ENSG00000157741.14	ENSG00000176563.9			ENSG00000204116.11
ENSG00000249319.2	ENSG00000121297.6			ENSG00000214717.10
ENSG00000257093.6	ENSG00000101290.13			ENSG00000250349.3
ENSG00000269955.2	ENSG00000133424.20			ENSG00000269502.5
ENSG00000147789.15	ENSG00000230067.3			ENSG00000178162.8
ENSG00000083223.17	ENSG00000271894.1			ENSG00000233487.6
ENSG00000148356.13	ENSG00000227544.8			ENSG00000273628.1
ENSG00000251184.1	ENSG00000135845.9			ENSG00000186369.10
ENSG00000120539.14	ENSG00000143248.12			ENSG00000257267.2
ENSG00000269891.2	ENSG00000153898.12			ENSG00000175147.11
ENSG00000162227.7	ENSG00000162706.12			ENSG00000227082.1
ENSG00000255432.1	ENSG00000171735.18			ENSG00000227579.5
ENSG00000255508.7	ENSG00000115350.11			ENSG00000228794.8
ENSG00000004700.15	ENSG00000152049.6			ENSG00000228971.2
ENSG00000089234.15	ENSG00000152284.4			ENSG00000233593.8
ENSG00000139636.15	ENSG00000187231.13			ENSG00000267272.5
ENSG00000173588.14	ENSG00000163848.19			ENSG00000271853.5
ENSG00000257727.5	ENSG00000168421.12			ENSG00000175772.10
ENSG00000072121.15	ENSG00000184178.15			ENSG00000224509.2
ENSG00000100764.13	ENSG00000183775.10			ENSG00000225539.5
ENSG00000258941.3	ENSG00000009844.15			ENSG00000235026.5
ENSG00000069956.11	ENSG00000004799.7			ENSG00000235597.1
ENSG00000275835.4	ENSG00000105976.14			ENSG00000237737.5
ENSG00000213380.14	ENSG00000261115.5			ENSG00000271894.1
ENSG00000214940.8	ENSG00000047249.16			ENSG00000239482.6
ENSG00000109111.14	ENSG00000160446.18			ENSG00000242428.5
ENSG00000198740.8	ENSG00000148737.16			ENSG00000242759.6
ENSG00000099804.8	ENSG00000062282.14			ENSG00000242808.7
ENSG00000105705.15	ENSG00000137513.9			ENSG00000243069.7
ENSG00000127511.9	ENSG00000162191.13			ENSG00000180769.8
ENSG00000196605.7	ENSG00000244734.3			ENSG00000249106.1
ENSG00000221874.4	ENSG00000017427.15			ENSG00000249307.5
ENSG00000269403.1	ENSG00000111348.8			ENSG00000250241.5
ENSG00000283229.1	ENSG00000033170.16			ENSG00000251372.5
ENSG00000101199.12	ENSG00000166557.12			ENSG00000152931.7
ENSG00000124103.8	ENSG00000103460.16			ENSG00000237187.8
ENSG00000100353.17	ENSG00000108924.13			ENSG00000248294.1
ENSG00000272150.5	ENSG00000198125.12			ENSG00000248455.5
ENSG00000185485.14	ENSG00000203416.3			ENSG00000248673.1
ENSG00000127957.16	ENSG00000260517.2			ENSG00000249306.5
ENSG00000242073.2	ENSG00000264772.6			ENSG00000249436.1
ENSG00000235837.1	ENSG00000081237.18			ENSG00000250584.2
ENSG00000246273.6	ENSG00000116670.14			ENSG00000254187.1
ENSG00000258666.1	ENSG00000117643.14			ENSG00000280776.1
ENSG00000215769.8	ENSG00000127124.14			ENSG00000216863.9
ENSG00000132716.18	ENSG00000169442.8			ENSG00000228408.6
ENSG00000134744.13	ENSG00000175130.6			ENSG00000231769.2
ENSG00000160049.11	ENSG00000188404.8			ENSG00000233452.6
ENSG00000259030.6	ENSG00000196352.14			ENSG00000235652.7
ENSG00000135968.20	ENSG00000248485.1			ENSG00000271860.6
ENSG00000155744.9	ENSG00000074047.21			ENSG00000272168.6
ENSG00000219626.8	ENSG00000187123.14			ENSG00000223561.6
ENSG00000273155.1	ENSG00000156136.9			ENSG00000226380.8
ENSG00000004534.14	ENSG00000163145.12			ENSG00000227544.8
ENSG00000144895.11	ENSG00000171368.11			ENSG00000231764.8
ENSG00000179021.9	ENSG00000095951.16			ENSG00000233073.1
ENSG00000138658.15	ENSG00000105894.11			ENSG00000233123.1
ENSG00000168826.15	ENSG00000106070.17			ENSG00000234336.6
ENSG00000113597.17	ENSG00000128512.19			ENSG00000214803.3
ENSG00000161010.14	ENSG00000186591.11			ENSG00000247317.3
ENSG00000164331.9	ENSG00000134014.16			ENSG00000248858.7
ENSG00000075790.10	ENSG00000119125.16			ENSG00000253642.5
ENSG00000165055.15	ENSG00000122952.16			ENSG00000253762.1
ENSG00000104613.11	ENSG00000165406.15			ENSG00000254081.1
ENSG00000104660.17	ENSG00000182022.17			ENSG00000254092.1
ENSG00000182372.8	ENSG00000198915.11			ENSG00000254254.5
ENSG00000198728.10	ENSG00000149179.13			ENSG00000225472.1
ENSG00000149182.14	ENSG00000159403.15			ENSG00000236733.1
ENSG00000173599.13	ENSG00000275778.1			ENSG00000228484.1
ENSG00000182919.14	ENSG00000196405.12			ENSG00000229847.8
ENSG00000255073.8	ENSG00000170921.14			ENSG00000270111.2
ENSG00000139323.13	ENSG00000101082.13			ENSG00000255082.1
ENSG00000139625.12	ENSG00000124191.17			ENSG00000255087.2
ENSG00000150967.17	ENSG00000203896.9			ENSG00000256422.5
ENSG00000183955.12	ENSG00000102181.20			ENSG00000256824.1
ENSG00000130177.14	ENSG00000155008.13			ENSG00000257069.5
ENSG00000182957.15	ENSG00000123091.4			ENSG00000255693.1
ENSG00000244754.8	ENSG00000143207.19			ENSG00000256193.5
ENSG00000100554.11	ENSG00000143772.9			ENSG00000258847.1
ENSG00000100714.15	ENSG00000163191.5			ENSG00000206187.3
ENSG00000104131.12	ENSG00000071073.12			ENSG00000247556.6
ENSG00000215252.11	ENSG00000091436.16			ENSG00000248079.2
ENSG00000183793.13	ENSG00000115956.9			ENSG00000259168.1
ENSG00000188827.10	ENSG00000114757.18			ENSG00000259385.1
ENSG00000055483.19	ENSG00000163637.11			ENSG00000259543.1
ENSG00000072778.19	ENSG00000172667.10			ENSG00000261606.5
ENSG00000173818.16	ENSG00000113532.12			ENSG00000260664.2
ENSG00000064490.13	ENSG00000113657.12			ENSG00000261325.1
ENSG00000099341.11	ENSG00000158985.13			ENSG00000262454.2
ENSG00000105329.9	ENSG00000091129.19			ENSG00000279877.1
ENSG00000123815.11	ENSG00000105939.12			ENSG00000265313.5
ENSG00000125755.18	ENSG00000122507.20			ENSG00000283538.1
ENSG00000257529.5	ENSG00000135046.13			ENSG00000227115.7
ENSG00000262919.7	ENSG00000154127.9			ENSG00000263878.1
ENSG00000272645.3	ENSG00000160588.9			ENSG00000283294.1
ENSG00000236859.6	ENSG00000205213.13			ENSG00000176840.11
ENSG00000237126.8	ENSG00000111716.12			ENSG00000264515.5
ENSG00000260269.5	ENSG00000127324.8			ENSG00000267448.5
ENSG00000084072.16	ENSG00000100784.10			ENSG00000267629.3
ENSG00000122477.12	ENSG00000100234.11			ENSG00000233508.2
ENSG00000125945.14	ENSG00000250412.1			ENSG00000224924.6
ENSG00000137944.16	ENSG00000275325.4			ENSG00000229425.2
ENSG00000143420.17	ENSG00000228971.2			ENSG00000273492.5
ENSG00000186141.8	ENSG00000084676.15			ENSG00000225465.8
ENSG00000196187.11	ENSG00000197635.9			ENSG00000225783.6
ENSG00000260238.6	ENSG00000091490.10			ENSG00000237037.9
ENSG00000115556.13	ENSG00000109189.12			ENSG00000228543.1
ENSG00000135945.9	ENSG00000164144.15			ENSG00000232160.6
ENSG00000155438.11	ENSG00000169744.12			ENSG00000235437.7
ENSG00000162927.13	ENSG00000120708.16			ENSG00000237341.1
ENSG00000162929.13	ENSG00000175048.16			ENSG00000270069.1
ENSG00000066422.4	ENSG00000183742.12
ENSG00000072756.16	ENSG00000010438.16
ENSG00000114054.13	ENSG00000119938.8
ENSG00000145014.17	ENSG00000185187.12
ENSG00000154174.7	ENSG00000074590.13
ENSG00000168924.14	ENSG00000198353.7
ENSG00000181826.9	ENSG00000100605.16
ENSG00000124571.17	ENSG00000157540.19
ENSG00000146426.17	ENSG00000128228.4
ENSG00000198755.10	ENSG00000183579.15
ENSG00000259040.5	ENSG00000254170.1
ENSG00000005075.15	ENSG00000116675.15
ENSG00000126522.16	ENSG00000075884.12
ENSG00000197024.8	ENSG00000168899.4
ENSG00000240230.5	ENSG00000082701.14
ENSG00000104218.14	ENSG00000178053.17
ENSG00000197694.14	ENSG00000173320.10
ENSG00000107651.12	ENSG00000168685.14
ENSG00000132740.8	ENSG00000112335.14
ENSG00000166181.12	ENSG00000124615.17
ENSG00000100722.18	ENSG00000145990.10
ENSG00000259529.1	ENSG00000233822.4
ENSG00000090857.13	ENSG00000105855.9
ENSG00000103197.16	ENSG00000105866.13
ENSG00000140829.11	ENSG00000146648.16
ENSG00000155393.12	ENSG00000156831.7
ENSG00000168434.12	ENSG00000151892.14
ENSG00000087157.18	ENSG00000165886.4
ENSG00000159210.9	ENSG00000111490.12
ENSG00000167840.13	ENSG00000196935.8
ENSG00000176108.9	ENSG00000102554.13
ENSG00000267426.5	ENSG00000132964.11
ENSG00000278311.4	ENSG00000183098.10
ENSG00000141385.9	ENSG00000053254.15
ENSG00000081665.13	ENSG00000128849.10
ENSG00000099331.13	ENSG00000166068.12
ENSG00000167785.8	ENSG00000048471.13
ENSG00000101191.16	ENSG00000185973.10
ENSG00000204070.9	ENSG00000185986.11
ENSG00000254995.4	ENSG00000266933.2
ENSG00000259399.1	ENSG00000162377.5
ENSG00000275464.4	ENSG00000162599.15
ENSG00000100038.19	ENSG00000175756.13
ENSG00000203761.5	ENSG00000153767.9
ENSG00000215837.7	ENSG00000156976.15
ENSG00000277072.4	ENSG00000163297.16
ENSG00000278416.1	ENSG00000164142.15
ENSG00000270025.2	ENSG00000183783.6
ENSG00000234818.1	ENSG00000118985.15
ENSG00000233893.1	ENSG00000006451.7
ENSG00000196295.11	ENSG00000106823.12
ENSG00000246174.7	ENSG00000241978.9
ENSG00000254907.1	ENSG00000048740.18
ENSG00000116830.11	ENSG00000198873.11
ENSG00000117360.12	ENSG00000129158.10
ENSG00000132780.16	ENSG00000111404.6
ENSG00000160058.18	ENSG00000151491.12
ENSG00000163867.16	ENSG00000173262.11
ENSG00000164010.13	ENSG00000152484.13
ENSG00000271723.5	ENSG00000100744.14
ENSG00000065911.11	ENSG00000069667.15
ENSG00000115183.13	ENSG00000160321.14
ENSG00000115233.11	ENSG00000188158.14
ENSG00000119760.15	ENSG00000241735.1
ENSG00000144224.16	ENSG00000280286.1
ENSG00000114416.17	ENSG00000269904.2
ENSG00000136518.16	ENSG00000235078.1
ENSG00000163320.10	ENSG00000092969.11
ENSG00000172053.16	ENSG00000116874.11
ENSG00000132406.11	ENSG00000135842.16
ENSG00000145388.14	ENSG00000088179.8
ENSG00000145414.8	ENSG00000157985.18
ENSG00000163312.10	ENSG00000197756.9
ENSG00000163319.10	ENSG00000144455.13
ENSG00000163945.15	ENSG00000169908.11
ENSG00000172493.20	ENSG00000109265.13
ENSG00000185619.18	ENSG00000151612.15
ENSG00000113643.8	ENSG00000131508.15
ENSG00000133706.17	ENSG00000176788.8
ENSG00000153113.23	ENSG00000111846.15
ENSG00000176783.14	ENSG00000112242.14
ENSG00000185129.5	ENSG00000112378.11
ENSG00000204628.11	ENSG00000118503.14
ENSG00000262209.2	ENSG00000005108.15
ENSG00000105819.13	ENSG00000146592.16
ENSG00000164818.15	ENSG00000151150.21
ENSG00000158941.16	ENSG00000134909.18
ENSG00000188343.12	ENSG00000167797.7
ENSG00000095319.14	ENSG00000182985.16
ENSG00000099290.15	ENSG00000174099.10
ENSG00000187522.14	ENSG00000118946.11
ENSG00000173914.11	ENSG00000020577.13
ENSG00000186166.8	ENSG00000137818.11
ENSG00000166881.9	ENSG00000187951.10
ENSG00000185344.13	ENSG00000153976.2
ENSG00000053770.11	ENSG00000215421.9
ENSG00000103642.11	ENSG00000101265.15
ENSG00000175265.17	ENSG00000155307.17
ENSG00000007545.15	ENSG00000180530.10
ENSG00000008710.18	ENSG00000124915.10
ENSG00000072864.13	ENSG00000248079.2
ENSG00000103365.15	ENSG00000117410.13
ENSG00000167005.13	ENSG00000158966.13
ENSG00000260851.6	ENSG00000163545.8
ENSG00000108825.17	ENSG00000115380.19
ENSG00000186532.11	ENSG00000115602.16
ENSG00000197879.14	ENSG00000120519.14
ENSG00000256525.6	ENSG00000151247.12
ENSG00000273559.4	ENSG00000081189.14
ENSG00000104824.16	ENSG00000113068.9
ENSG00000105397.13	ENSG00000112773.15
ENSG00000160352.15	ENSG00000135525.18
ENSG00000268614.1	ENSG00000071189.21
ENSG00000100983.9	ENSG00000106066.14
ENSG00000126005.16	ENSG00000127922.9
ENSG00000132670.20	ENSG00000164855.15
ENSG00000100106.19	ENSG00000120526.10
ENSG00000100347.14	ENSG00000275342.4
ENSG00000128159.11	ENSG00000134996.11
ENSG00000186951.16	ENSG00000172889.15
ENSG00000196236.12	ENSG00000132334.16
ENSG00000277053.4	ENSG00000148516.21
ENSG00000266820.1	ENSG00000166167.17
ENSG00000226167.1	ENSG00000059804.15
ENSG00000226438.1	ENSG00000134533.6
ENSG00000260185.1	ENSG00000133121.20
ENSG00000266469.1	ENSG00000166428.12
ENSG00000116221.15	ENSG00000197555.9
ENSG00000130695.13	ENSG00000103740.9
ENSG00000143257.11	ENSG00000104043.14
ENSG00000185278.15	ENSG00000140280.13
ENSG00000144233.9	ENSG00000172379.19
ENSG00000151665.12	ENSG00000181827.14
ENSG00000155657.25	ENSG00000103316.10
ENSG00000162994.15	ENSG00000183010.16
ENSG00000283186.1	ENSG00000081913.13
ENSG00000145191.12	ENSG00000104904.12
ENSG00000157036.12	ENSG00000100285.9
ENSG00000163714.17	ENSG00000196588.14

## Sheet: 1000NotRegulatedGenesGO
Ontology	Name	Binom_Raw_PValue	Hyper_Raw_PValue
GO Molecular Function
	isomerase activity	0	1.122152 E-03
	intramolecular transferase activity	0	3.367130 E-03
	ARF GTPase activator activity	2.958706 E-208	7.958759 E-06
	peptidyl-prolyl cis-trans isomerase activity	3.876873 E-142	4.708509 E-03
	cis-trans isomerase activity	3.418933 E-140	6.683237 E-03
	metal ion binding	4.609883 E-16	6.577756 E-03
	cation binding	7.217814 E-14	7.082381 E-03
	zinc ion binding	1.119903 E-12	9.189911 E-03
	DNA-directed RNA polymerase activity	8.498973 E-06	1.672110 E-03
	mRNA (2'-O-methyladenosin E-N6-)-methyltransferase activity	1.019099 E-04	8.843222 E-03
	aminoacyl-tRNA ligase activity	6.153209 E-04	1.606123 E-06
	DNA binding	7.027825 E-04	8.412816 E-04
	endodeoxyribonuclease activity, producing 5'-phosphomonoesters	1.998163 E-03	1.627403 E-03
	RS domain binding	2.677580 E-03	2.162789 E-03
	tRNA binding	5.526434 E-03	1.367188 E-03
GO Biological Process
	regulation of ARF GTPase activity	4.248591 E-201	1.187661 E-05
	regulation of ARF protein signal transduction	4.704474 E-169	8.991626 E-05
	protein peptidyl-prolyl isomerization	3.876873 E-142	4.708509 E-03
	peptidyl-proline modification	1.373956 E-126	6.899834 E-03
	protein folding	5.351947 E-73	4.785369 E-03
	primary metabolic process	6.013041 E-36	2.773456 E-08
	organic substance metabolic process	4.070391 E-30	9.319000 E-08
	metabolic process	3.963670 E-24	6.890971 E-07
	intracellular protein transport	1.221358 E-18	6.348712 E-03
	protein transport	2.062520 E-14	2.724729 E-05
	establishment of protein localization	1.620657 E-13	1.692011 E-05
	intracellular transport	6.853173 E-13	6.463269 E-04
	cellular macromolecule metabolic process	1.601124 E-11	6.250228 E-14
	peptidyl-amino acid modification	3.033096 E-11	6.128152 E-04
	regulation of glycolysis by regulation of transcription from RNA polymerase II promoter	2.998032 E-07	8.843222 E-03
	regulation of nucleobas E-containing compound metabolic process	2.873371 E-06	1.593897 E-04
	mRNA transport	5.527258 E-06	1.041752 E-03
	macromolecule localization	6.640794 E-06	4.372868 E-05
	regulation of nitrogen compound metabolic process	7.122954 E-06	1.497340 E-04
	cellular metabolic process	1.158398 E-05	1.716699 E-08
	gene expression	1.874673 E-05	2.126106 E-11
	RNA metabolic process	2.462344 E-05	8.806928 E-09
	macromolecule metabolic process	3.737772 E-05	1.534061 E-10
	transcription from RNA polymerase III promoter	7.119741 E-05	3.223790 E-03
	'de novo' cotranslational protein folding	7.305531 E-05	8.843222 E-03
	vesicle coating	8.328717 E-05	2.636310 E-03
	RNA transport	1.729234 E-04	2.791661 E-03
	RNA localization	2.156331 E-04	2.345925 E-03
	protein localization	2.180587 E-04	1.313928 E-04
	cellular protein metabolic process	3.451721 E-04	5.153717 E-06
	RNA biosynthetic process	3.912915 E-04	4.713228 E-04
	transcription, DNA-dependent	4.143231 E-04	4.318011 E-04
	DNA-dependent transcription, elongation	4.183618 E-04	2.437245 E-03
	membrane budding	8.329810 E-04	7.884752 E-03
	establishment of localization in cell	8.542350 E-04	2.830388 E-03
	translation	9.869276 E-04	2.270827 E-07
	cellular component biogenesis	1.126446 E-03	3.509506 E-03
	microtubule nucleation	1.132111 E-03	2.098485 E-04
	metanephric proximal tubule development	2.188413 E-03	8.843222 E-03
	cristae formation	2.273104 E-03	7.182778 E-03
	nucleic acid metabolic process	2.362186 E-03	2.496983 E-10
	regulation of translational initiation in response to stress	2.396156 E-03	2.162789 E-03
	mRNA splicing, via spliceosome	2.570934 E-03	3.157918 E-04
	peroxisome fission	3.023163 E-03	1.231158 E-03
	mitochondrial fusion	3.125547 E-03	2.082837 E-03
	RNA splicing, via transesterification reactions	3.399227 E-03	2.419327 E-04
	positive regulation of isotype switching to IgA isotypes	3.828029 E-03	8.843222 E-03
	diadenosine polyphosphate metabolic process	4.412277 E-03	8.309364 E-04
	regulation of cellular metabolic process	5.059557 E-03	3.242767 E-05
	regulation of DNA damage checkpoint	6.200075 E-03	1.001614 E-03
	tRNA aminoacylation for protein translation	6.325976 E-03	2.699217 E-05
	regulation of isotype switching to IgA isotypes	6.696722 E-03	8.309364 E-04
	regulation of primary metabolic process	7.732410 E-03	2.118179 E-04
	cellular component organization or biogenesis	8.519095 E-03	2.487287 E-04
	cellular component organization	8.567709 E-03	8.616585 E-04
	COPI coating of Golgi vesicle	8.764286 E-03	4.944007 E-03
	proximal tubule development	9.021704 E-03	7.182778 E-03
	maintenance of protein location in nucleus	9.541956 E-03	7.101577 E-03
GO Cellular Component
	protein complex	3.986546 E-94	2.907778 E-03
	macromolecular complex	7.301183 E-92	2.337711 E-06
	intracellular part	2.956795 E-70	9.696203 E-16
	intracellular	2.496955 E-67	4.766126 E-16
	microtubule organizing center	2.548192 E-45	1.365796 E-05
	cytoplasm	9.850192 E-41	1.930914 E-07
	intracellular organelle part	2.576949 E-31	2.178327 E-11
	intracellular non-membran E-bounded organelle	1.061168 E-29	5.169138 E-06
	organelle part	4.062794 E-28	8.421143 E-11
	microtubule cytoskeleton	2.507997 E-17	1.063133 E-05
	nuclear DNA-directed RNA polymerase complex	4.428484 E-07	3.014594 E-04
	RNA polymerase complex	5.407191 E-07	3.463454 E-04
	nuclear pore	4.702220 E-06	8.815137 E-03
	mitochondrion	2.594635 E-05	3.999893 E-04
	intracellular organelle	1.750395 E-04	3.840580 E-15
	organelle	2.416093 E-04	3.615874 E-15
	centrosome	3.301562 E-04	4.009063 E-06
	ribonucleoprotein complex	3.828415 E-04	1.919423 E-09
	nucleus	7.092767 E-04	4.770863 E-13
	DNA-directed RNA polymerase II, holoenzyme	7.183049 E-04	2.358164 E-03
	chiasma	1.263787 E-03	8.843222 E-03
	MutLbeta complex	1.263787 E-03	8.843222 E-03
	nuclear speck	4.398836 E-03	4.104693 E-05
	small ribosomal subunit	6.481404 E-03	1.826731 E-03
	gamma-tubulin ring complex	7.908394 E-03	4.423418 E-06
Mouse Phenotype
	abnormal ear lobe morphology	9.342186 E-160	0.0071827780
	embryonic lethality before implantation	1.904697 E-70	0.0014278210
	complete embryonic lethality before implantation	6.698451 E-69	0.0013678120
	disorganized mitochondrial cristae	1.619833 E-06	0.0010016140
	abnormal cingulum morphology	1.447542 E-03	0.0088432220
	hypervolemia	7.694523 E-03	0.0008309364
Human Phenotype
	Thenar muscle atrophy	0.0004752386	0.0071827780
	Severe sensorineural hearing impairment	0.0008378083	0.0088432220
	Hypoplasia of the musculature	0.0038361470	0.0003608795
Disease Ontology
	impaired renal function disease	0.001700932	0.0071827780
	glioblastoma multiforme of brain	0.003627677	0.0008309364
MSigDB Oncogenic Signatures
	Genes down-regulated in HEL cells (erythroleukemia) after knockdown of JAK2 [Gene ID=3717] gene by RNAi.	1.396287 E-15	0.0013060320
	Genes up-regulated in MCF10A cells vs knockdown of EIF4G1 [Gene ID=1981] gene by RNAi.	6.858941 E-03	0.0001187878
MSigDB Immunologic Signatures
	Genes up-regulated in comparison of B cells versus erythroblasts.	1.656673 E-20	8.943804 E-03
	Genes up-regulated in comparison of peripheral blood mononuclear cells (PBMC) from healthy donors versus PBMC from patients with acute E. coli infection.	4.300911 E-18	2.928361 E-04
	Genes down-regulated in comparison of peripheral blood mononuclear cells (PBMC) from TIV influenza vaccinee at day 3 post-vaccination versus those at day 7 post-vaccination.	3.089254 E-17	2.610709 E-03
	Genes up-regulated in comparison of unstimulated dendritic cells (DC) at 0 h versus DCs stimulated with LPS (TLR4 agonist) for 2 h.	3.280863 E-17	4.654601 E-05
	Genes up-regulated in comparison of CD8 T cells versus erythroblasts.	4.599380 E-12	1.031268 E-04
	Genes up-regulated in comparison of control polymorphonuclear leukocytes (PMN) at 3 h versus PMN treated with F. tularensis vaccine at 3 h.	6.556877 E-10	5.751634 E-05
	Genes up-regulated in comparison of plasmacytoid dendritic cells from LAIV influenza vaccinee at day 7 post-vaccination vesus those from TIV influenza vaccinee at day 7.	1.552434 E-09	2.828522 E-05
	Genes down-regulated in comparison of neutrophils versus B cells.	9.096037 E-09	2.526344 E-04
	Genes down-regulated in comparison of naive CD8 T cells versus effector CD8 IL2RA [GeneID=3559] low T cells at.	1.659153 E-08	5.388677 E-03
	Genes up-regulated in comparison of control conventional dendritic cells (cDC) at 10 h versus cDCs infected with Newcastle disease virus (NDV) at 10 h.	5.809992 E-08	2.608163 E-03
	Genes up-regulated in comparison of peripheral blood mononuclear cells (PBMC) from healthy donors versus PBMCs from patients with type 2 diabetes at the time of diagnosis.	7.871619 E-08	8.511278 E-04
	Genes down-regulated in comparison of naive CD8 T cells versus effector CD8 IL2RA [GeneID=3559] high T cells at.	6.784017 E-07	1.316522 E-03
	Genes down-regulated in comparison of dendritic cells (DC) stimulated with poly(I:C) (TLR3 agonist) at 4 h versus DC cells stimulated with Pam3Csk4 (TLR1/2 agonist) at 4 h.	7.854820 E-07	4.538405 E-03
	Genes down-regulated in comparison of dendritic cells (DC) stimulated with Pam3Csk4 (TLR1/2 agonist) at 24 h versus DC cells stimulated with CpG DNA (TLR9 agonist) at 24 h.	1.471849 E-05	6.479863 E-04
	Genes up-regulated in comparison of dendritic cells (DC) stimulated with LPS (TLR4 agonist) at 8 h versus DC cells stimulated with poly(I:C) (TLR3 agonist) at 8 h.	5.064459 E-05	7.552435 E-03
	Genes down-regulated in comparison of dendritic cells (DC) stimulated with LPS (TLR4 agonist) at 6 h versus DC cells stimulated with Pam3Csk4 (TLR1/2 agonist) at 6 h.	2.463426 E-04	1.316522 E-03
	Genes up-regulated in comparison of control dendritic cells (DC) at 4 h versus those stimulated with poly(I:C) (TLR3 agonist) at 4 h.	2.625417 E-04	6.256179 E-03
	Genes down-regulated in comparison of control polymorphonuclear leukocytes (PMN) at 6 h versus PMN treated with F. tularensis vaccine at 6 h.	6.837691 E-04	2.207021 E-03
	Genes up-regulated in comparison of untreated CD4 [GeneID=920] T cells at 1 h versus the untreated cells at 72 h.	1.041213 E-03	5.933204 E-03
	Genes down-regulated in comparison of naive B cells versus memory B cells.	3.059065 E-03	1.206813 E-03
	Genes up-regulated in comparison of unstimulated dendritic cells (DC) at 0 h versus DCs stimulated with LPS (TLR4 agonist) and R848 for 2 h.	6.369470 E-03	3.567504 E-06
MSigDB Cancer Neighborhood
	Neighborhood of PPP2R5E	9.112329 E-10	1.232349 E-03
	Neighborhood of AP2M1	3.464877 E-08	5.907660 E-05
	Neighborhood of DAP3	6.496681 E-08	1.276374 E-04
	Neighborhood of CTBP1	2.323435 E-07	2.225179 E-04
	Neighborhood of PSMC1	6.447043 E-06	1.105151 E-03
	Neighborhood of PPP1CA	7.290335 E-06	1.993143 E-04
	Neighborhood of UBE2I	7.393085 E-06	7.884752 E-03
	Neighborhood of RAN	9.402653 E-06	6.009582 E-06
	Neighborhood of RPA2	8.844035 E-05	6.731714 E-03
	Neighborhood of NF2	1.380189 E-04	4.317702 E-06
	Neighborhood of PRKAG1	2.767704 E-04	2.288768 E-03
	Neighborhood of TPT1	3.100345 E-04	1.704384 E-03
	Neighborhood of UBE2I	3.240709 E-04	1.368984 E-05
	Neighborhood of RAB1A	3.458514 E-04	4.204950 E-03
	Neighborhood of APEX1	9.700221 E-04	6.201676 E-03
	Neighborhood of HDAC1	1.311466 E-03	1.351540 E-05
	Neighborhood of SOD1	1.311631 E-03	6.953513 E-06
	Neighborhood of RAD23B	1.678238 E-03	1.285224 E-04
	Neighborhood of MAP2K2	2.767002 E-03	5.262028 E-03
	Neighborhood of CUL1	2.989405 E-03	1.612594 E-03
	Neighborhood of RAB10	3.339387 E-03	4.762514 E-03
	Neighborhood of MTA1	3.490279 E-03	5.259473 E-04
	Neighborhood of GSPT1	4.408824 E-03	4.468701 E-04
	Neighborhood of CSNK2B	4.467517 E-03	6.565514 E-05
	Neighborhood of RAC1	4.641813 E-03	3.534018 E-04
	Neighborhood of ANP32B	5.589901 E-03	4.291323 E-05
	Neighborhood of CCNI	6.038323 E-03	1.228724 E-03
	Neighborhood of FBL	6.239222 E-03	1.158359 E-03
	Neighborhood of ACTG1	6.742336 E-03	3.589373 E-03
	Neighborhood of BUB3	7.644045 E-03	5.432687 E-05
	Neighborhood of NUMA1	7.697749 E-03	8.024784 E-03
BioCyc Pathway
	tRNA charging	0.00320455	3.063339 E-06
MSigDB Pathway
	RNA polymerase	6.559338 E-09	5.353953 E-03
	Spliceosome	1.815022 E-06	2.936571 E-03
	Basal transcription factors	2.297643 E-06	1.077052 E-03
	Genes involved in Processing of Capped Intron-Containing Pr E-mRNA	3.226193 E-06	5.663327 E-05
	Genes involved in mRNA Splicing	2.353193 E-05	1.280365 E-04
	Genes involved in mRNA Processing	3.341212 E-04	5.647501 E-04
	Genes involved in RNA Polymerase III Transcription	4.147781 E-04	9.864364 E-03
	Genes involved in Viral Messenger RNA Synthesis	6.978739 E-04	7.101577 E-03
	Genes involved in Transcription	7.117510 E-04	8.094558 E-03
	Genes involved in Unfolded Protein Response	1.156308 E-03	1.889566 E-03
	Genes involved in COPI Mediated Transport	3.789443 E-03	1.231158 E-03
	Aminoacyl-tRNA biosynthesis	3.841430 E-03	1.232493 E-05
	Genes involved in Membrane Trafficking	4.829988 E-03	8.240241 E-03
	Genes involved in Cytosolic tRNA aminoacylation	6.269181 E-03	1.992764 E-04
	Genes involved in tRNA Aminoacylation	9.679291 E-03	1.689564 E-05
MGI Expression: Detected
	TS23_epiglottis	0.002135165	0.008843222
	TS28_afferent arteriole	0.002894923	0.008843222
MSigDB Perturbation
	Genes down-regulated by second pulse of EGF [GeneID =1950] in 184A1 cells (mammary epithelium).	7.791684 E-194	3.636025 E-04
	Set 'Myc targets2': targets of c-Myc [GeneID=4609] and Max [GeneID=4149] identified by ChIP on chip in a Burkitt's lymphoma cell line; overlap set.	2.135909 E-36	1.729884 E-04
	Genes whose promoters are bound by MYC [GeneID=4609], according to MYC Target Gene Database.	2.772155 E-24	8.417570 E-07
	Genes up-regulated in liver tumor compared to the normal adjacent tissue.	1.777267 E-18	1.145058 E-07
	Genes up-regulated in hepatocellular carcinoma (HCC) compared to normal liver samples.	3.340601 E-14	7.078911 E-04
	Genes down-regulated in HEK-293 cells (fibroblast) upon knockdown of both CTBP1 and SATB1 [GeneID=1487, 6304] by RNAi.	6.810320 E-06	1.415097 E-03
	Genes down-regulated in non-metastatic breast cancer tumors having type 1 amplification in the 20q13 region; involves ZNF217 [GeneID=7764] locus only.	1.715172 E-05	3.016454 E-05
	Selected genes down-regulated in inflammatory monocytes infiltrating hepatocellular carcinoma (HCC).	5.999437 E-03	7.100193 E-03
	Genes down-regulated in monocytes by RUNX1-RUNX1T1 [GeneID=861;862] fusion.	8.302071 E-03	3.535583 E-04
	Genes distinguishing prednisolone [PubChem=5755] resistant and sensitive B-lineage ALL; here - genes up-regulated in the drug resistant samples.	9.250662 E-03	2.288443 E-03
MSigDB Predicted Promoter Motifs
	Motif CCGNMNNTNACG (no known TF)	0.0006661569	3.801263 E-03
	Motif SCGGAAGY matches ELK1: ELK1, member of ETS oncogene family	0.0019911520	1.578972 E-09
	Motif CGGAARNGGCNG (no known TF)	0.0083915390	6.966960 E-05
InterPro
	Neuroblastoma breakpoint family (NBPF) domain	0	1.378063 E-09
	Mitochondrial inner membrane translocase complex, subunit Tim23	1.573278 E-305	8.843222 E-03
	Arf GTPase activating protein	2.958706 E-208	7.958759 E-06
	Cyclophilin-type peptidyl-prolyl cis-trans isomerase	1.408833 E-196	6.581350 E-04
	Cyclophilin-type peptidyl-prolyl cis-trans isomerase, conserved site	3.546007 E-180	1.763951 E-04
	Cyclophilin-like peptidyl-prolyl cis-trans isomerase domain	2.315281 E-178	5.772036 E-04
	GPCR 89-related	6.409848 E-173	8.309364 E-04
	Golgi pH regulator, conserved domain	6.409848 E-173	8.309364 E-04
	Abscisic acid G-protein coupled receptor-like domain	6.409848 E-173	8.309364 E-04
	CobW/HypB/UreG domain	7.011342 E-149	1.001614 E-03
	Cobalamin (vitamin B12) biosynthesis CobW-like, C-terminal	7.011342 E-149	1.001614 E-03
	Neutral/alkaline nonlysosomal ceramidase	8.044615 E-103	8.843222 E-03
	GTF2I-like repeat	5.379059 E-91	3.089639 E-03
	Nuclear pore protein POM121	3.366881 E-17	8.309364 E-04
	ENTH/VHS	1.564842 E-14	8.533753 E-03
	CID domain	1.327699 E-13	4.004079 E-03
	Uncharacterised protein family UPF0220	4.943877 E-06	8.843222 E-03
	Nuclear pore complex interacting protein	6.126855 E-05	1.954862 E-06
	Paired amphipathic helix	1.218560 E-03	8.309364 E-04
	Aminoacyl-tRNA synthetase, class I, conserved site	1.543677 E-03	2.098485 E-04
	Gamma-tubulin complex component protein	1.691812 E-03	3.608795 E-04
	Glycyl-tRNA synthetase/DNA polymerase subunit gamma-2	2.046489 E-03	8.843222 E-03
	Ribosomal protein L14b/L23e	2.563317 E-03	8.843222 E-03
	Ribosomal protein L14 domain	2.563317 E-03	8.843222 E-03
	Zinc finger, MYM-type	2.792100 E-03	4.004079 E-03
	DNA topoisomerase, type IA	3.088635 E-03	8.843222 E-03
	DNA topoisomerase, type IA, domain 2	3.088635 E-03	8.843222 E-03
	DNA topoisomerase, type IA, DNA-binding	3.088635 E-03	8.843222 E-03
	DNA topoisomerase, type IA, central	3.088635 E-03	8.843222 E-03
	DNA topoisomerase, type IA, central region, subdomain 1	3.088635 E-03	8.843222 E-03
	DNA topoisomerase, type IA, central region, subdomain 2	3.088635 E-03	8.843222 E-03
	DNA topoisomerase, type IA, core domain	3.088635 E-03	8.843222 E-03
	DNA topoisomerase, type IA, active site	3.088635 E-03	8.843222 E-03
	Glycoside hydrolase, family 23	6.965331 E-03	8.843222 E-03
TreeFam
	NBPF11, NBPF12, NBPF14, NBPF15, NBPF16, ...	0	9.556270 E-08
	human translocase of inner mitochondrial membrane 23 homolog (yeast)	1.573278 E-305	8.843222 E-03
	AGAP1, AGAP10, AGAP2, AGAP3, AGAP4, ...	3.741418 E-282	2.112161 E-06
	PTPN20A, PTPN20B	1.841158 E-267	8.843222 E-03
	PPIA, PPIAL4A, PPIAL4B, PPIAL4C, PPIAL4D, ...	4.500822 E-217	4.051205 E-05
	CBWD1, CBWD2, CBWD3, CBWD5, CBWD6	1.348705 E-179	3.608795 E-04
	GPR89A, GPR89B, GPR89C	6.409848 E-173	8.309364 E-04
	ASAH2, ASAH2C	8.044615 E-103	8.843222 E-03
	GTF2I, GTF2IRD1, GTF2IRD2, GTF2IRD2B	5.379059 E-91	3.089639 E-03
	TMEM50A, TMEM50B	4.943877 E-06	8.843222 E-03
	ENSG00000198064, ENSG00000234719, NPIPA1, NPIPB11, NPIPB15, ...	1.199169 E-04	1.627419 E-05
	CPSF4, CPSF4L	1.951158 E-04	8.843222 E-03
	CDC-like kinase	3.008033 E-04	7.803561 E-05
	GTPBP1, GTPBP2	3.833431 E-03	8.843222 E-03
	splicing factor, arginine/serin E-rich 1/9	3.922520 E-03	8.843222 E-03
	LYG1, LYG2	6.965331 E-03	8.843222 E-03
	NME5, NME6	9.719917 E-03	8.843222 E-03
HGNC Gene Families
	NBPF	0	1.159835 E-08
	POLR	6.479971 E-08	5.353953 E-03
	GTF	1.892403 E-06	1.627403 E-03
	CLK	3.008033 E-04	7.803561 E-05
	AARS1	7.097810 E-04	1.112804 E-04
	MRPS	1.312805 E-03	4.981186 E-05

## Sheet: 1000MostRegulatedGenesGO
Ontology	Name	Binom_Raw_PValue	Hyper_Raw_PValue
GO Molecular Function
	transferase activity	2.740451 E-235	8.803459 E-03
	ion binding	7.697130 E-84	4.068184 E-03
	binding	9.197542 E-54	2.977395 E-05
	phosphatidylinositol phospholipase C activity	2.702149 E-21	1.492120 E-03
	phospholipase C activity	4.859748 E-21	2.502430 E-03
	phosphoric diester hydrolase activity	8.890951 E-11	6.167721 E-04
	SH3/SH2 adaptor activity	1.111416 E-03	2.673090 E-04
	enzyme binding	2.735220 E-03	1.601218 E-04
GO Biological Process
	singl E-organism process	2.497210 E-66	4.036936 E-07
	singl E-organism cellular process	1.668927 E-64	7.154307 E-06
	biological regulation	5.030468 E-44	1.868759 E-04
	cellular process	1.190068 E-42	3.318757 E-03
	cellular protein complex assembly	1.213623 E-25	3.935363 E-03
	actin cytoskeleton organization	2.467003 E-15	5.021635 E-03
	mitotic G2 phase	6.676622 E-08	8.196540 E-03
	melanocyte differentiation	1.132301 E-07	1.945527 E-03
	pigment cell differentiation	3.460171 E-07	4.955835 E-03
	developmental pigmentation	1.554657 E-06	3.975651 E-04
	cell growth	1.178827 E-05	2.074571 E-03
	positive regulation of mitotic cell cycle phase transition	5.317541 E-05	7.552225 E-03
	positive regulation of cell cycle phase transition	6.697369 E-05	9.308676 E-03
	neuroepithelial cell differentiation	8.752762 E-05	4.873495 E-03
	cellular response to hydroperoxide	5.373278 E-03	9.867548 E-04
GO Cellular Component
	platelet alpha granule	0.0001667598	1.917974 E-03
	Golgi apparatus	0.0035772890	1.115973 E-05
Mouse Phenotype
	abnormal B-1 B cell number	1.518126 E-37	1.613313 E-03
	abnormal B-1 B cell morphology	1.767405 E-37	1.831682 E-03
	abnormal B-1a B cell morphology	6.247330 E-19	4.645669 E-03
	decreased mature B cell number	4.191786 E-15	1.486280 E-03
	abnormal mature B cell morphology	2.572485 E-14	2.862917 E-03
	abnormal hair follicle melanocyte morphology	3.398097 E-14	7.552225 E-03
	arrested T cell differentiation	2.308822 E-11	1.868475 E-04
	abnormal vitreous body morphology	2.278347 E-10	9.348274 E-03
	impaired lung alveolus development	5.149393 E-10	7.045266 E-03
	abnormal urinary bladder morphology	1.259226 E-09	5.144988 E-04
	abnormal B cell differentiation	1.331260 E-09	8.693005 E-05
	abnormal branching involved in ureteric bud morphogenesis	1.157287 E-08	2.818699 E-04
	abnormal B cell proliferation	5.141536 E-08	2.117045 E-03
	impaired branching involved in ureteric bud morphogenesis	5.239110 E-08	6.978333 E-03
	abnormal B cell activation	7.240772 E-08	1.041908 E-03
	decreased B cell number	1.686000 E-07	3.332066 E-04
	abnormal ureteric bud morphology	9.432828 E-07	4.802155 E-04
	abnormal B cell number	7.091826 E-06	3.457089 E-04
	abnormal professional antigen presenting cell morphology	2.542469 E-05	6.349967 E-06
	abnormal B cell morphology	3.553896 E-05	5.748160 E-05
	decreased leukocyte cell number	7.634163 E-05	9.260591 E-05
	decreased anterior commissure size	8.652819 E-05	4.554796 E-03
	abnormal immature B cell morphology	1.673189 E-03	6.982525 E-03
	decreased corpus callosum size	2.020650 E-03	1.116708 E-03
	abnormal smooth muscle morphology	2.374261 E-03	9.491984 E-03
	abnormal pregnancy	2.452647 E-03	3.097220 E-03
	abnormal lymphopoiesis	3.045509 E-03	1.944176 E-06
	abnormal mononuclear cell differentiation	3.759905 E-03	2.841573 E-06
	abnormal kidney development	4.184124 E-03	9.022266 E-03
	decreased hematopoietic cell number	4.644412 E-03	2.253622 E-04
	abnormal lung development	6.009604 E-03	5.695610 E-04
	submission towards male mice	6.396912 E-03	9.916474 E-03
	abnormal ureter morphology	8.212064 E-03	1.113453 E-03
	abnormal myeloblast morphology/development	8.485308 E-03	9.175448 E-07
Human Phenotype
	Arterial tortuosity	3.114728 E-07	0.0049408120
	Vascular tortuosity	5.216771 E-07	0.0081965400
	Dermatan sulfate excretion in urine	5.990777 E-05	0.0009867548
	Con E-shaped epiphyses of the proximal phalanges of the hand	1.647396 E-03	0.0099164740
	Leukodystrophy	1.975562 E-03	0.0074204690
Disease Ontology
	laryngeal neoplasm	3.822222 E-16	0.0072370980
	malignant mesothelioma	5.846791 E-13	0.0082995760
	basal cell carcinoma	9.978174 E-11	0.0036304100
	mesothelioma	4.939951 E-10	0.0004377734
	prostate carcinoma	1.107328 E-09	0.0007398361
	malignant neoplasm of lip, oral cavity and pharynx	1.334818 E-09	0.0028371590
	skin carcinoma	9.366325 E-08	0.0049064080
	pulmonary fibrosis	2.134217 E-06	0.0035793710
	hereditary breast ovarian cancer	1.468893 E-04	0.0026807670
	nasopharynx carcinoma	6.171411 E-04	0.0030025400
	malignant neoplasm of prostate	7.862314 E-04	0.0051309060
	malignant neoplasm of male genital organ or tract	8.009275 E-04	0.0055961470
	Adenoviridae infectious disease	1.014927 E-03	0.0063779330
	prostatic neoplasm	2.358457 E-03	0.0067525870
	prostate disease	3.653958 E-03	0.0086353130
	neck carcinoma	5.802554 E-03	0.0001782806
	bladder cancer	6.771977 E-03	0.0015605070
MSigDB Oncogenic Signatures
	Genes down-regulated in myometrial cells over-expressing a shortened splice form of ATF2 [Gene ID=1386] gene.	1.505047 E-29	0.0013198090
	Genes down-regulated in mouse fibroblasts over-expressing E2F1 [Gene ID=1869] gene.	8.395798 E-29	0.0019678220
MSigDB Immunologic Signatures
	Genes down-regulated in myometrial cells over-expressing ATF2 [Gene ID=1386] gene.	3.055094 E-26	0.0004546145
	Genes down-regulated in comparison of dendritic cells (DC) stimulated with poly(I:C) (TLR3 agonist) at 1 h versus DC cells stimulated with Gardiquimod (TLR7 agonist) at 1 h.	0	8.679793 E-03
	Genes down-regulated in comparison of dendritic cells (DC) stimulated with poly(I:C) (TLR3 agonist) at 1 h versus DC cells stimulated with Pam3Csk4 (TLR1/2 agonist) at 1 h.	0	6.485354 E-03
	Genes up-regulated in comparison of effector CD8 T cells versus memory CD8 T cells.	0	2.818374 E-03
	Genes down-regulated in comparison of CD25- T cells treated with IL4 [GeneID=3565] at day 10 versus untreated CD25- T cells at day 10.	2.223429 E-39	6.485354 E-03
	Genes down-regulated in comparison of dendritic cells (DC) stimulated with R848 at 8 h versus DCs stimulated with LPS (TLR4 agonist) and R848 for 8 h.	5.906033 E-31	2.181705 E-05
	Genes down-regulated in comparison of unstimulated dendritic cells (DC) at 0 h versus DCs stimulated with LPS (TLR4 agonist) for 8 h.	1.351165 E-30	2.836231 E-05
	Genes down-regulated in comparison of unstimulated peripheral blood mononuclear cells (PBMC) cultured for 0 h versus PBMC cultured for 3 h with YF17D vaccine.	3.006021 E-28	7.141451 E-04
	Genes down-regulated in comparison of unstimulated dendritic cells (DC) at 0 h versus DCs stimulated with LPS (TLR4 agonist) and R848 for 8 h.	3.230280 E-27	4.721167 E-03
	Genes up-regulated in comparison of TregCD103+Klrg1- versus TregCD103+Klrg1+ (see Table 1S in the paper for details).	4.421646 E-25	2.145722 E-03
	Genes up-regulated in comparison of untreated wild type macrophages at 4 h versus those from IRAK4 [GeneID=51135] deficient mice at 4 h.	1.155169 E-20	5.579180 E-03
	Genes up-regulated in comparison of control dendritic cells (DC) at 12 h versus those stimulated with Pam3Csk4 (TLR1/2 agonist) at 12 h.	3.274848 E-18	6.201441 E-04
	Genes down-regulated in comparison of regulatory T cell (Treg) versus conventional T cells.	4.819127 E-12	4.848978 E-04
	Genes down-regulated in comparsion of sfActCD4 versus ActCD4 (see Fig. 1 in the paper for details).	5.781089 E-09	1.041594 E-04
	Genes up-regulated in comparison of naive CD4 [GeneID=920] CD8 T cells versus unstimulated dendritic cells (DC).	2.645677 E-08	1.613821 E-04
	Genes up-regulated in comparison of naive CD8 T cells versus activated CD8 T cells.	1.417614 E-07	4.014282 E-03
	Genes down-regulated in comparsion of ActCD8 versus ActCD4 (see Fig. 1 in the paper for details).	1.546228 E-07	8.615631 E-04
	Genes up-regulated in comparison of resting CD4 [GeneID=920] T cells versus bystander activated CD4 [GeneID=920] T cells.	3.857235 E-07	5.551382 E-04
	Genes down-regulated in comparison of thymic progenitors versus DN3 thymocytes.	6.206514 E-07	3.859114 E-06
	Genes down-regulated in comparison of lymph node regulatory T cells versus fat tissue regulatory T cells.	8.343984 E-07	8.388151 E-06
	Genes up-regulated in comparison of systemic lupus erythematosus CD4 [GeneID=920] T cells versus systemic lupus erythematosus myeloid cells.	1.010081 E-06	7.136252 E-06
	Genes up-regulated in comparison of Th2cells versus induced regulatory T cell (Treg).	1.030687 E-06	6.780919 E-04
	Genes up-regulated in comparison of dendritic cells (DC) stimulated with Gardiquimod (TLR7 agonist) at 4 h versus those stimulated with Gardiquimod (TLR7 agonist) at 24 h.	1.150407 E-06	5.579180 E-03
	Genes down-regulated in comparison of memory CD4 [GeneID=920] T cells from young donors treated with TSST at 16 h versus those from old donors treated with TSST at 16 h.	1.168379 E-06	4.781532 E-03
	Genes up-regulated in comparison of untreated CD4 [GeneID=920] memory T cells from old donors versus those treated with TSST at 16 h.	1.429208 E-06	3.620766 E-05
	Genes up-regulated in comparison of Jurkat T cells stimulated in the presence of PD-1 versus controls.	1.366614 E-05	8.177294 E-05
	Genes down-regulated in comparison of induced regulatory T cell (Treg) versus natural regulatory T cell (Treg).	1.440227 E-05	5.579180 E-03
	Genes up-regulated in comparison of macrophages versus Th2 cells.	1.561395 E-05	3.002540 E-03
	Genes up-regulated in comparison of untreated CD4 [GeneID=920] T cells at 0 h versus the cells treated with IL4 [GeneID=3565] and anti-IL12 at 72 h.	2.391206 E-05	1.144771 E-03
	Genes up-regulated in comparison of dendritic cells (DC) stimulated with LPS (TLR4 agonist) at 2 h versus DC cells stimulated with poly(I:C) (TLR3 agonist) at 2 h.	2.644794 E-05	5.579180 E-03
	Genes up-regulated in comparison of untreated CD4 [GeneID=920] memory T cells from young donors versus those treated with TSST at 16 h.	3.355483 E-05	4.083018 E-05
	Genes up-regulated in comparison of naive B cells versus plasma cells.	3.726184 E-05	5.565256 E-04
	Genes up-regulated in comparison of untreated CD4 [GeneID=920] T cells at 0 h versus the cells treated with IL4 [GeneID=3565] and anti-IL12 at 4 h.	9.233941 E-05	1.349573 E-04
	Genes down-regulated in comparison of NK cells treated with IL15 [GeneID=3567] versus untreated NK cells.	1.130180 E-04	2.148668 E-06
	Genes up-regulated in comparison of untreated CD4 [GeneID=920] T cells at 0 h versus the untreated cells at 24 h.	1.882191 E-04	4.548386 E-03
	Genes down-regulated in comparison of control dendritic cells (DC) at 4 h versus those stimulated with CpG DNA (TLR9 agonist) at 4 h.	1.913270 E-04	9.326237 E-03
	Genes down-regulated in comparison of naive CD8 T cells versus naive B cells.	2.205322 E-04	3.268501 E-06
	Genes up-regulated in comparison of untreated CD4 [GeneID=920] T cells at 0 h versus the cells treated with IL4 [GeneID=3565] and anti-IL12 at 6 h.	2.750046 E-04	8.635313 E-03
	Genes up-regulated in comparison of untreated CD4 [GeneID=920] memory T cells from young donors versus those treated with TSST at 40 h.	4.696972 E-04	2.273296 E-03
	Genes up-regulated in comparison of systemic lupus erythematosus CD4 [GeneID=920] T cells versus systemic lupus erythematosus B cells.	5.488149 E-04	5.810471 E-05
	Genes up-regulated in comparison of untreated CD4 [GeneID=920] T cells at 0 h versus the cells treated with IL4 [GeneID=3565] and anti-IL12 at 24 h.	7.441540 E-04	5.216390 E-04
	Genes down-regulated in comparison of healthy CD4 [GeneID=920] T cells versus healthy CD19 [GeneID=920] B cells.	8.293204 E-04	1.363204 E-09
	Genes down-regulated in peripheral blood mononuclear cells (PBMC) from patients with type 1 diabetes at the time of diagnosis versus those with type 2 diabetes at the time of diagnosis.	1.553313 E-03	4.214039 E-04
	Genes up-regulated in comparison of dendritic cells (DC) stimulated with LPS (TLR4 agonist) at 6 h versus DC cells stimulated with Gardiquimod (TLR7 agonist) at 6 h.	1.877728 E-03	6.982525 E-03
	Genes up-regulated in comparison of untreated CD4 [GeneID=920] memory T cells from old donors versus those treated with TSST at 72 h.	1.881974 E-03	8.224386 E-04
	Genes down-regulated in comparison of effector CD8 T cells KRLG1 Int [GeneID=10219] vs those with KRLG1 Hi.	1.992575 E-03	2.813748 E-04
	Genes up-regulated in comparison of healthy CD4 [GeneID=920] T cells versus healthy myeloid cells.	2.615350 E-03	4.382514 E-04
	Genes up-regulated in comparison of untreated CD4 [GeneID=920] memory T cells from young donors versus those treated with TSST at 72 h.	3.287372 E-03	6.451415 E-03
	Genes down-regulated in comparsion of ActTreg versus ActCD4 (see Fig. 1 in the paper for details).	3.539457 E-03	7.472080 E-04
	Genes up-regulated in comparison of untreated CD4 [GeneID=920] memory T cells from old donors versus those treated with TSST at 40 h.	7.752173 E-03	6.146650 E-04
MSigDB Cancer Neighborhood
	Neighborhood of AQP4	7.592624 E-58	0.009898549
	Neighborhood of PTPN6	7.300256 E-03	0.000500047
MSigDB Pathway
	Genes involved in Nucleotid E-binding domain, leucine rich repeat containing receptor (NLR) signaling pathways	2.042464 E-05	0.004645669
	Genes involved in Regulation of KIT signaling	3.870599 E-05	0.003215308
	Glypican 1 network	8.259019 E-03	0.003749173
MGI Expression: Detected
	TS23_lower jaw tooth	0	4.580224 E-05
	TS23_upper jaw tooth	0	9.099362 E-05
	TS23_telencephalon ventricular layer	0	4.180128 E-05
	TS23_midbrain ventricular layer	0	1.788024 E-03
	TS23_lower jaw incisor	0	3.670835 E-03
	TS23_lower jaw molar	0	2.939377 E-04
	TS23_upper jaw incisor	0	8.336910 E-04
	TS23_upper jaw molar	0	3.276134 E-03
	TS23_olfactory cortex	0	4.068677 E-05
	TS23_rest of cerebellum	0	3.035221 E-15
	TS23_rest of cerebellum marginal layer	0	4.177144 E-03
	TS23_rest of cerebellum ventricular layer	0	1.368985 E-04
	TS22_intestine	0	2.563346 E-06
	TS22_gonad	0	3.239906 E-03
	TS22_jaw	0	1.647872 E-06
	TS22_tooth	0	1.480885 E-06
	TS22_genital tubercle	0	1.629814 E-08
	TS22_choroid plexus	0	2.839074 E-05
	TS22_meninges	0	3.101187 E-05
	TS22_face	0	3.456220 E-10
	TS22_muscle	0	1.360279 E-05
	TS22_haemolymphoid system	0	2.165013 E-06
	TS22_hair	0	1.585493 E-03
	TS22_hair follicle	0	2.037093 E-04
	TS22_vibrissa follicle	0	1.987717 E-04
	TS22_basal ganglia	0	1.204287 E-07
	TS22_neocortex	0	7.361119 E-05
	TS22_hippocampus	0	1.793976 E-07
	TS22_piriform cortex	0	2.241844 E-06
	TS22_olfactory bulb	0	2.449278 E-08
	TS22_pallidum	0	7.872812 E-05
	TS22_telencephalon septum	0	2.367864 E-06
	TS22_tectum	0	2.903504 E-06
	TS22_inferior colliculus	0	7.154969 E-05
	TS22_superior colliculus	0	4.103320 E-07
	TS22_urethra	0	5.171264 E-06
	TS22_appendicular skeleton	0	2.929728 E-05
	TS23_tectum	0	3.624875 E-04
	TS23_inferior colliculus	0	3.514848 E-03
	TS22_ear	0	5.106866 E-09
	TS22_inner ear	0	6.338186 E-10
	TS22_inner ear vestibular component	0	5.014892 E-10
	TS22_saccule	0	1.557404 E-09
	TS22_cochlea	0	1.102803 E-09
	TS22_labyrinth	0	6.635363 E-10
	TS22_middle ear	0	5.064585 E-05
	TS22_retina	0	9.757110 E-07
	TS22_lens	0	9.455508 E-06
	TS22_nose	0	3.010533 E-08
	TS22_nasal cavity	0	6.489923 E-08
	TS22_nasal cavity epithelium	0	8.534018 E-08
	TS22_olfactory epithelium	0	2.060372 E-07
	TS22_foregut gland	0	2.294630 E-05
	TS22_thyroid gland	0	4.120627 E-03
	TS22_thymus primordium	0	9.001145 E-05
	TS22_pharynx	0	7.612066 E-08
	TS22_tongue	0	5.981113 E-08
	TS22_stomach	0	8.642090 E-07
	TS22_salivary gland	0	7.345428 E-03
	TS22_upper jaw	0	4.997426 E-09
	TS22_palatal shelf	0	5.415032 E-10
	TS22_respiratory tract	0	2.911288 E-06
	TS22_lower respiratory tract	0	2.564527 E-06
	TS22_main bronchus	0	6.356177 E-04
	TS22_trachea	0	5.172033 E-07
	TS22_larynx	0	5.057190 E-10
	TS22_liver	0	8.940231 E-03
	TS22_metanephros	0	4.866555 E-09
	TS22_drainage component	0	1.800815 E-05
	TS22_ureter	0	1.907603 E-05
	TS22_urinary bladder	0	1.150372 E-09
	TS22_pituitary gland	0	1.244127 E-09
	TS22_corpus striatum	0	5.758757 E-07
	TS22_olfactory lobe	0	1.138638 E-09
	TS22_olfactory cortex	0	3.301966 E-09
	TS22_integumental system	0	3.557608 E-10
	TS22_forelimb	0	4.128582 E-11
	TS22_hindlimb	0	6.255229 E-12
	TS22_tail	0	1.208251 E-08
	TS22_skeleton	0	5.445739 E-09
	TS22_cranium	0	1.721260 E-05
	TS22_viscerocranium	0	1.281854 E-06
	TS22_facial bone primordium	0	1.184982 E-06
	TS22_head	0	1.041668 E-10
	TS22_gland	0	1.639076 E-07
	TS22_adrenal gland	0	4.945733 E-06
	TS23_skeleton	0	3.446617 E-10
	TS23_cranium	0	1.091049 E-03
	TS23_liver and biliary system	0	8.583459 E-03
	TS23_viscerocranium	0	1.036241 E-03
	TS23_haemolymphoid system	0	7.055824 E-07
	TS23_liver	0	7.829469 E-03
	TS23_thymus primordium	0	1.934527 E-06
	TS23_orbitosphenoid bone	0	9.107687 E-04
	TS23_gland	3.952525 E-323	8.722346 E-09
	TS22_oesophagus	5.355672 E-321	2.221299 E-08
	TS22_skin	7.554264 E-321	6.690260 E-08
	TS22_reproductive system	1.574834 E-319	4.658684 E-07
	TS22_lung	1.530841 E-316	2.056876 E-07
	TS23_vibrissa	1.095434 E-310	2.369203 E-10
	TS22_pancreas	1.161730 E-303	6.914640 E-06
	TS22_eye	4.260235 E-302	1.859116 E-08
	TS22_limb	4.888568 E-299	4.516370 E-14
	TS23_rest of skin	3.383582 E-298	5.828742 E-11
	TS22_midbrain	3.393184 E-294	5.428287 E-08
	TS22_oral region	6.172918 E-294	2.834018 E-08
	TS22_respiratory system	1.219379 E-290	1.277926 E-08
	TS23_integumental system	5.611578 E-289	9.581432 E-14
	TS22_foregut	1.857497 E-283	3.579742 E-07
	TS22_renal-urinary system	9.206227 E-276	2.457439 E-10
	TS22_diencephalon	3.461129 E-275	6.296137 E-15
	TS23_upper jaw	2.222273 E-267	5.981113 E-08
	TS22_cerebral cortex	2.408962 E-250	1.898982 E-13
	TS23_lower jaw	2.039668 E-246	1.014998 E-09
	TS23_midbrain lateral wall	9.843673 E-244	3.597194 E-12
	TS22_gut	5.932128 E-243	1.746005 E-09
	TS22_sensory organ	2.575422 E-237	9.853150 E-09
	TS22_telencephalon	1.515858 E-234	2.876669 E-15
	TS22_alimentary system	1.365659 E-219	4.257340 E-09
	TS22_forebrain	2.144221 E-217	2.134443 E-16
	TS23_olfactory lobe	5.415253 E-206	2.014342 E-09
	TS22_brain	7.800164 E-190	4.857141 E-19
	TS22_visceral organ	1.557804 E-187	1.216278 E-08
	TS22_central nervous system	2.392482 E-181	3.813373 E-19
	TS23_oral region	9.038754 E-180	2.785059 E-08
	TS22_nervous system	7.952760 E-176	3.467125 E-18
	TS23_cerebellum	3.487620 E-168	1.264167 E-15
	TS23_metencephalon alar plate	1.079788 E-162	5.534832 E-16
	TS23_alimentary system	1.784115 E-140	5.058568 E-15
	TS23_metencephalon lateral wall	7.519592 E-132	2.686812 E-19
	TS22_organ system	4.262452 E-128	4.547513 E-16
	TS23_metencephalon	3.645968 E-127	1.202041 E-20
	Theiler_stage_22	1.233326 E-119	1.267608 E-16
	TS22_embryo	4.568738 E-119	8.696486 E-16
	TS23_midbrain	6.900427 E-117	9.521423 E-19
	TS23_hindbrain	5.726617 E-105	9.326632 E-24
	TS23_telencephalon	7.326250 E-94	4.051129 E-22
	TS23_forebrain	7.169257 E-77	4.701812 E-24
	TS23_central nervous system	3.046280 E-76	1.112821 E-25
	TS23_nervous system	2.965680 E-75	1.443655 E-26
	TS23_visceral organ	2.419691 E-67	3.350685 E-15
	TS23_brain	4.519479 E-63	1.442688 E-26
	TS23_organ system	3.677671 E-45	8.155654 E-23
	TS23_embryo	2.634423 E-37	2.813895 E-20
	Theiler_stage_23	2.651234 E-37	3.228610 E-20
	TS26_neural retina inner nuclear layer	4.588598 E-30	1.360025 E-04
	TS26_neural retina outer nuclear layer	1.606647 E-13	4.869299 E-03
	TS23_medulla oblongata choroid plexus	1.799185 E-12	2.086151 E-03
	TS26_neural retina nuclear layer	1.896150 E-11	1.639494 E-04
	TS26_neural retina	1.080694 E-10	6.193326 E-05
	TS24_neural retina nuclear layer	6.818091 E-10	6.816391 E-03
	TS22_basal forebrain	1.690924 E-08	9.955759 E-08
	TS12_lateral plate mesenchyme	1.735727 E-08	9.366180 E-04
	TS23_spinal cord meninges	1.482741 E-07	1.774898 E-03
	TS24_neural retina	2.533263 E-07	1.163426 E-03
	TS22_heart atrium	3.142709 E-07	8.173204 E-10
	TS23_choroid plexus	3.616534 E-07	1.583618 E-03
	TS25_metanephros	7.839387 E-06	8.512237 E-04
	TS28_retina outer nuclear layer	9.252138 E-06	6.116852 E-05
	TS23_diencephalon meninges	1.570720 E-05	1.684649 E-03
	TS23_midbrain meninges	2.163845 E-05	2.938379 E-03
	TS23_telencephalon meninges	3.210670 E-05	3.246137 E-04
	TS15_optic vesicle	4.226324 E-05	1.398146 E-03
	TS23_hindbrain meninges	6.039776 E-05	3.108607 E-03
	TS25_sclera	7.494674 E-05	9.916474 E-03
	TS26_retina	7.801563 E-05	1.966477 E-03
	TS28_retina inner nuclear layer	8.531147 E-05	2.374639 E-06
	TS19_C7 vertebral cartilage condensation	8.664525 E-05	2.681324 E-03
	TS19_T1 vertebral cartilage condensation	1.375405 E-04	4.940812 E-03
	TS23_telencephalon marginal layer	1.753450 E-04	9.788332 E-04
	TS19_T2 vertebral cartilage condensation	1.799428 E-04	8.196540 E-03
	TS19_T3 vertebral cartilage condensation	1.799428 E-04	8.196540 E-03
	TS22_axial skeleton	3.798495 E-04	1.652105 E-09
	TS25_renal-urinary system	9.522057 E-04	4.815144 E-04
	TS24_retina	1.011841 E-03	9.132395 E-05
	TS24_hindbrain	2.246252 E-03	3.901503 E-03
	TS24_metencephalon	2.477598 E-03	5.615982 E-03
	TS21_lower jaw	3.300853 E-03	6.882226 E-03
	TS22_amygdala	4.302254 E-03	3.197257 E-07
	TS26_eye	4.819500 E-03	4.082055 E-04
	TS23_forelimb phalanx	6.479194 E-03	3.652601 E-03
	TS23_cavity or cavity lining	6.509184 E-03	7.716304 E-04
	TS20_nasal cavity epithelium	7.467571 E-03	1.260953 E-03
	TS28_cerebellum external granule cell layer	7.587423 E-03	1.015363 E-03
	TS24_forearm	7.693992 E-03	4.886541 E-04
	TS21_testis germinal epithelium	8.872577 E-03	9.351368 E-04
MSigDB Perturbation
	Genes whose promoters display higher levels of histone H3 trimethylation mark at K27 (H3K27me3) in hepatocellular carcinoma (HCC) compared to normal liver.	0	1.254393 E-09
	Genes down-regulated in primary fibroblast cell culture after infection with HCMV (AD169 strain) at 12 h time point that were not down-regulated at the previous time point, 10 h.	0	2.825967 E-04
	Genes down-regulated in primary fibroblast cell culture after infection with HCMV (AD169 strain) at 24 h time point that were not down-regulated at the previous time point, 20 h.	0	2.541105 E-04
	Genes up-regulated in confluent IMR90 cells (fibroblast) after knockdown of RB1 [GeneID=5925] by RNAi.	0	1.797438 E-11
	Common down-regulated transcripts in fibroblasts expressing either XP/CS or TDD mutant forms of ERCC3 [GeneID=2071], after UVC irradiation.	0	8.620772 E-25
	Selected genes down-regulated in WS1 (fibroblast) in response to irradiation with low dose UV-C.	0	2.500311 E-11
	Genes down-regulated upon overexpression of PARVB [GeneID=29780] in MDA-MB-231 cells (breast cancer) cultured in 3D collagen I and 3D Matrigel only.	0	1.225448 E-05
	Genes up-regulated in PC3 cells (prostate cancer) after EZH2 [GeneID=2146] knockdown by RNAi.	0	6.410777 E-07
	Genes changed between developmental stages of Valpha14i natural killer T lymphocyte cells (NKT).	0	9.465359 E-05
	Genes up-regulated in PC3 cells (prostate cancer) after knockdown of NIPP1 [GeneID=5511] by RNAi.	0	6.685775 E-05
	Genes up-regulated in HepaRG cells (liver cancer) expressing constituvely active form of MTOR [GeneID=2475].	0	7.500529 E-03
	Cluster 4: genes down-regulated in B493-6 cells (B lymphocytes) upon serum stimulation but not affected by MYC [GeneID=4609].	0	1.660286 E-03
	Genes up-regulated in U2OS cells (osteosarcoma) upon knockdown of both HDAC1 and HDAC2 [GeneID=3065;3066] by RNAi.	0	1.459666 E-03
	Genes up-regulated in U2OS cells (osteosarcoma) upon knockdown of HDAC1 [GeneID=3065] by RNAi.	0	2.726980 E-05
	Genes up-regulated in prostate cancer samples from African-American patients compared to those from the European-American patients.	0	3.234979 E-05
	Genes down-regulated in fibroblasts expressing mutant forms of ERCC3 [GeneID=2071] after UV irradiation.	2.138071 E-315	1.577989 E-28
	Genes down-regulated in erythroid progenitor cells from fetal livers of E13.5 embryos with KLF1 [GeneID=10661] knockout compared to those from the wild type embryos.	7.488767 E-288	5.672186 E-07
	Genes down-regulated in M E-A cells (breast cancer) undergoing apoptosis in response to doxorubicin [PubChem=31703].	5.869862 E-287	3.753470 E-15
	Genes with promoters bound by HOXC6 [GeneID=3223] in LNCaP cells (prostate cancer) and up-regulated upon loss of function (LOF) of HOXC6.	9.454339 E-113	1.599547 E-03
	Genes down-regulated in WE17/10 cells (CD4+ [GeneID=920] T lymphocytes) infected by HTLV1 (and thus displaying low CD7 [GeneID=924]) compared to the uninfected (i.e., CD7+) cells.	4.353030 E-38	4.211879 E-03
	Genes down-regulated in hairy cell leukemia (HCL) compared with normal and other neoplastic B cell populations.	1.025758 E-35	1.560458 E-06
	Genes down-regulated in CD34+ [GeneID=947] hematopoetic cells by expression of NUP98-HOXA9 fusion [GeneID=4928;3205] off a retroviral vector at 10 days after transduction.	4.748876 E-35	3.249439 E-03
	Genes up-rgulated in CD34+ [GeneID=947] hematopoetic cells by expression of NUP98-HOXA9 fusion [GeneID=4928;3205] off a retroviral vector at 6h.	6.794306 E-35	3.717745 E-08
	Genes up-regulated in peripheral blood mononucleocytes by HGF [GeneID=3082] compared to those regulated by CSF2RB (GM-CSF) and IL4 [GeneID=1437;3565].	1.603175 E-29	2.558551 E-05
	Genes up-regulated in Rh4 cells (alveolar rhabdomyosarcoma, ARMS) after knockdown of the PAX3-FOXO1 [GeneiD=5077;2308] fusion protein by RNAi for 72 hr.	8.584729 E-28	9.818508 E-04
	Genes up-regulated in MEF cells (embryonic fibroblast) upon stimulation with TGFB1 [GeneID=7040] for 10 h.	1.385510 E-23	6.018033 E-03
	Genes with GO annotation and up-regulated after DNA damage in cell lines from young donors.	2.715344 E-22	6.400603 E-04
	Genes down-regulated in samples from B-CLL (B-cell chronic lymphocytic leukemia) with the immunoglobulin heavy chain VH3-21 gene.	9.009162 E-19	8.998507 E-03
	Genes down-regulated in B-CLL (B-cell chronic lymphocytic leukemia) patients with mutated immunoglobulin variable heavy chain (VH) genes.	1.644352 E-18	4.645669 E-03
	Genes up-regulated in freshly isolated CD31- [GeneID=5175] (stromal stem cells from adipose tissue) versus the CD31+ (non-stem) counterparts.	8.543291 E-18	5.781158 E-11
	Age up-regulated genes in the human frontal cortex.	3.621973 E-17	2.506625 E-06
	Genes un-methylated aberrantly in HCT116 and Colo320 (colon cancer) cells.	1.640523 E-14	4.797799 E-03
	Genes from common genomic gains observed in a meta analyis of copy number alterations across a panel of different cancer cell lines and tumor samples.	1.748681 E-14	1.339812 E-03
	Genes up-regulated in peripheral blood monocytes by CSF2RB (GM-CSF) and IL4 [GeneID=1437;3565].	6.654907 E-14	3.022043 E-04
	Genes up-regulated in mice with skin specific knockout of TP53 [GeneID=7157].	9.859674 E-13	3.142834 E-03
	Genes up-regulated in peripheral blood monocytes by HGF [GeneID=3082].	3.394831 E-12	3.092188 E-04
	Genes down-regulated in glomeruli of kidneys from patients with diabetic nephropathy (type 2 diabetes mellitus).	4.093754 E-10	2.058479 E-11
	Genes up-regulated in the HMEC cells (primary mammary epithelium) upon expression of the transcriptionally active isoform of TP63 [GeneID=8626] off adenoviral vector.	1.983108 E-08	3.980440 E-03
	Cluster 2: genes down-regulated in lung tissue samples from mice with oncogenic form of KRAS [GeneID=3845] and inactivated PTEN [GeneID=5728].	4.212205 E-07	2.944080 E-03
	Top 40 genes from cluster 11 of acute myeloid leukemia (AML) expression profile; 67% of the samples are FAB M4 or M5.	2.465609 E-06	2.330189 E-05
	Genes up-regulated in uveal melanoma: class 2 vs class 1 tumors.	1.458766 E-05	4.930959 E-05
	Genes in this set correspond to the most abuntant transcripts that are also specific to platelets.	1.617131 E-05	1.800446 E-04
	Genes selected in supervised analyses to discriminate cells expressing E2F3 [GeneID=1871] from control cells expressing GFP.	2.455489 E-05	7.395965 E-03
	Genes down-regulated in brain from patients with Alzheimer's disease.	4.160833 E-05	2.289527 E-09
	Genes down-regulated in quiescent (G0) CD34+ [GeneID=8842] cells isolated from peripheral blood of CML (chronic myeloid leukemia) patients compared to the quiescent cells from normal donors.	8.518848 E-05	5.530519 E-03
	Genes that best predicted acute myeloid leukemia (AML) with mutations in CEBPA [GeneID=1050].	1.211743 E-04	4.036103 E-04
	Genes down-regulated in multiple myeloma (MM) cell lines treated with both decitabine [PubChem=451668] TSA [PubChem=5562].	3.714893 E-04	2.512618 E-07
	Genes induced in SKBR3 cells (breast cancer) by mutated TP53 [GeneID=7157].	1.062936 E-03	5.000470 E-04
	Genes down-regulated in hepatocellular carcinoma (HCC) with early recurrence.	1.279095 E-03	2.681324 E-03
	Genes down-regulated in peripheral blood monocytes by HGF [GeneID=3082].	1.684494 E-03	2.791912 E-04
	Genes down-regulated in the Ad/AH cells (adenocarcinoma) engineered to stably express the Epstein-Barr virus (EBV) gene EBNA1.	2.276744 E-03	1.749793 E-03
	Genes down-regulated by trabectedin [PubChem=3199] and its synthetic analog phthalascidin Pt 650 in HCT116 cells (colon cancer).	2.344327 E-03	2.073183 E-08
	Genes up-regulated in uterine fibroids vs normal myometrium samples.	3.151243 E-03	1.161193 E-03
	Transcripts showing subcellular localization only to proximal dendrites in the adult mouse brain.	3.210069 E-03	2.637470 E-03
	Genes down-regulated in MEF and REF cells (mouse and rat fibroblasts) but not in TIG3/T cells (human lung fibroblasts expressing TERT [GeneID=7015]) by co-expression of the SV40 early region and the activated HRAS (H-RasV12) [GeneID=3265].	4.744605 E-03	3.072941 E-03
	Genes down-regulated in the urogenital sinus (UGS) of day E16 females exposed to the androgen dihydrotestosterone [PubChem=10635] for 48 h.	7.007981 E-03	7.017761 E-16
	Genes down-regulated in peripheral blood monocytes by CSF2RB (GM-CSF) and IL4 [GeneID=1437;3565].	7.415675 E-03	3.674110 E-04
	Genes up-regulated in the normal-like subtype of breast cancer.	9.221726 E-03	5.759032 E-14
MSigDB Predicted Promoter Motifs
	Motif NNNAAASNN matches PAX2: paired box gene 2	0	4.668057 E-09
	Motif TATAAA matches TAF&lt;br&gt; TATA	6.238360 E-251	5.305682 E-06
	Motif RTTTNNNYTGGM (no known TF)	9.777065 E-03	6.435949 E-05
MSigDB miRNA Motifs
	Targets of MicroRNA ATAAGCT,MIR-21	0.0007949053	8.854292 E-07
	Targets of MicroRNA AACTGGA,MIR-145	0.0013372940	6.642826 E-06
	Targets of MicroRNA AAACCAC,MIR-140	0.0044349020	1.826662 E-03
InterPro
	Phospholipase C, phosphatidylinositol-specific , X domain	3.987915 E-27	0.0023168930
	PLC-like phosphodiesterase, TIM beta/alpha-barrel domain	7.408636 E-26	0.0004391536
	Ubiquitin-conjugating enzyme, E2	2.469214 E-04	0.0083791150
	C2 domain	6.118845 E-03	0.0096826700
	Tetraspanin	8.151367 E-03	0.0093086760
TreeFam
	ARFIP1, ARFIP2, PICK1	0.00858932	0.0009867548

## Sheet: BrainGO
Ontology	Name	Binom_Raw_PValue	Hyper_Raw_PValue
GO Molecular Function
	drug binding	3.677987 E-88	7.405701 E-03
	bis(5'-adenosyl)-triphosphatase activity	7.127296 E-55	7.103554 E-03
	metalloendopeptidase inhibitor activity	3.968810 E-04	4.435217 E-03
	metalloenzyme regulator activity	9.547687 E-04	6.196213 E-03
	AMP-activated protein kinase activity	1.159404 E-03	5.251968 E-03
	enzyme binding	1.706447 E-03	5.729001 E-03
	clathrin light chain binding	2.867275 E-03	5.981650 E-04
	phosphoprotein binding	5.842363 E-03	1.570249 E-05
	cytoskeletal protein binding	9.149812 E-03	4.797259 E-03
GO Biological Process
	phospholipase C-activating G-protein coupled receptor signaling pathway	4.896424 E-63	5.079359 E-03
	locomotory behavior	4.358741 E-50	4.023735 E-03
	regulation of ERK1 and ERK2 cascade	7.140877 E-46	8.621017 E-03
	regulation of peptide secretion	4.318792 E-43	1.817351 E-03
	regulation of peptide transport	6.557754 E-43	2.154258 E-03
	regulation of hormone secretion	1.053566 E-37	2.914966 E-04
	response to external stimulus	4.506047 E-35	7.823429 E-03
	regulation of neurological system process	6.528409 E-35	3.400942 E-05
	positive regulation of cellular biosynthetic process	5.364509 E-29	3.661655 E-03
	regulation of cellular biosynthetic process	7.511806 E-29	3.840994 E-03
	regulation of biosynthetic process	1.619783 E-28	3.588815 E-03
	positive regulation of biosynthetic process	1.683461 E-28	2.860638 E-03
	positive regulation of intracellular protein kinase cascade	5.832437 E-28	1.065189 E-04
	singl E-organism behavior	4.196147 E-27	1.260382 E-05
	regulation of homeostatic process	4.911692 E-27	6.128537 E-03
	axon guidance	2.279584 E-26	2.500172 E-05
	positive regulation of MAPK cascade	2.277400 E-25	4.879467 E-04
	intracellular transport	4.456831 E-25	3.349451 E-03
	synaptic transmission	8.720743 E-25	8.301288 E-15
	positive regulation of cellular metabolic process	3.002252 E-23	3.380476 E-05
	behavior	1.591845 E-22	8.610934 E-06
	regulation of cellular metabolic process	3.790514 E-22	2.121210 E-04
	positive regulation of metabolic process	6.440959 E-22	5.567893 E-06
	cell surface receptor signaling pathway	7.479226 E-22	4.282715 E-04
	regulation of primary metabolic process	2.306407 E-21	4.060286 E-04
	cell morphogenesis involved in neuron differentiation	2.241893 E-20	1.457166 E-06
	transmission of nerve impulse	2.480032 E-20	1.779857 E-13
	axonogenesis	1.366554 E-19	3.108225 E-05
	chemotaxis	1.754100 E-19	2.213623 E-03
	regulation of metabolic process	1.938993 E-19	5.282106 E-04
	signal transduction	9.569434 E-19	1.741000 E-07
	cation transport	1.002273 E-18	1.247809 E-03
	multicellular organismal signaling	1.362205 E-18	3.803337 E-13
	axon development	2.576312 E-18	8.307965 E-05
	regulation of proteasomal protein catabolic process	2.653076 E-18	1.723878 E-03
	neuron projection morphogenesis	3.300864 E-18	1.126251 E-05
	enzyme linked receptor protein signaling pathway	3.833945 E-18	2.527890 E-06
	regulation of intracellular protein kinase cascade	3.973931 E-18	7.310523 E-05
	regulation of proteasomal ubiquitin-dependent protein catabolic process	8.777899 E-18	6.609086 E-03
	regulation of MAPK cascade	4.328420 E-17	5.483114 E-04
	regulation of system process	1.167027 E-16	8.508108 E-08
	metal ion transport	1.633369 E-16	4.583881 E-03
	positive regulation of cellular process	2.439433 E-16	1.416530 E-08
	single organism signaling	3.976868 E-16	1.649234 E-10
	cell morphogenesis involved in differentiation	8.129745 E-16	3.425052 E-07
	establishment of localization in cell	2.003509 E-15	4.793810 E-04
	regulation of cellular localization	5.392635 E-15	3.798508 E-05
	cellular response to stimulus	6.045445 E-15	8.359132 E-07
	neuron projection development	6.165808 E-15	2.052196 E-05
	cell communication	2.657100 E-14	5.235359 E-10
	regulation of biological quality	4.307452 E-14	9.470945 E-03
	cell projection morphogenesis	5.720199 E-14	2.238055 E-04
	cell part morphogenesis	7.017529 E-14	2.906584 E-04
	positive regulation of biological process	1.431917 E-13	6.192898 E-08
	positive regulation of transcription from RNA polymerase II promoter	8.485054 E-13	2.621755 E-03
	positive regulation of signal transduction	8.519905 E-13	2.706062 E-04
	positive regulation of phosphate metabolic process	1.101229 E-12	1.876803 E-03
	cell-cell signaling	3.045049 E-12	1.438768 E-10
	positive regulation of G2/M transition of mitotic cell cycle	3.786525 E-12	9.846902 E-03
	positive regulation of cell communication	1.580916 E-11	9.989602 E-05
	positive regulation of signaling	1.673982 E-11	1.353772 E-04
	regulation of transcription, DNA-dependent	5.910440 E-11	6.251294 E-03
	cellular localization	6.127542 E-11	1.853931 E-04
	regulation of RNA biosynthetic process	6.996511 E-11	8.296709 E-03
	neuron development	1.353331 E-10	8.531390 E-06
	cell morphogenesis	1.515628 E-10	2.220652 E-05
	cell projection organization	2.755716 E-10	1.031100 E-04
	regulation of RNA metabolic process	3.352486 E-10	9.803512 E-03
	regulation of cellular macromolecule biosynthetic process	1.419640 E-09	5.489617 E-03
	locomotion	1.862857 E-09	1.090615 E-04
	cellular component morphogenesis	2.890271 E-09	1.296957 E-04
	regulation of macromolecule biosynthetic process	6.004594 E-09	7.880853 E-03
	regulation of transport	8.989633 E-09	4.234031 E-06
	regulation of gene expression	1.605243 E-08	3.371629 E-03
	regulation of G2/M transition of mitotic cell cycle	2.130682 E-08	2.717566 E-03
	positive regulation of transcription, DNA-dependent	2.984768 E-08	3.762481 E-04
	neurological system process	7.447046 E-08	2.121424 E-04
	regulation of protein catabolic process	8.992280 E-08	3.784338 E-03
	cellular component movement	1.313841 E-07	8.748128 E-05
	response to stimulus	1.494663 E-07	6.365678 E-05
	positive regulation of RNA metabolic process	2.033097 E-07	2.138318 E-03
	positive regulation of gene expression	2.753252 E-07	7.544621 E-05
	trachea development	2.852180 E-07	3.061870 E-03
	positive regulation of response to stimulus	6.045597 E-07	5.362244 E-03
	positive regulation of macromolecule biosynthetic process	1.192311 E-06	2.472709 E-03
	regulation of macromolecule metabolic process	1.226538 E-06	3.594138 E-04
	neuron differentiation	1.671806 E-06	4.279294 E-07
	ectodermal placode formation	5.432118 E-06	4.435217 E-03
	regulation of protein tyrosine kinase activity	5.931419 E-06	5.936620 E-03
	regulation of transcription from RNA polymerase II promoter	6.685506 E-06	6.747324 E-03
	histone ubiquitination	6.717282 E-06	5.887497 E-03
	regulation of nucleobas E-containing compound metabolic process	8.409422 E-06	1.790216 E-03
	regulation of nitrogen compound metabolic process	1.303466 E-05	2.086334 E-03
	positive regulation of nucleobas E-containing compound metabolic process	2.071469 E-05	5.121155 E-03
	regulation of cellular process	2.157209 E-05	1.983334 E-06
	regulation of biological process	4.360337 E-05	2.235002 E-05
	positive regulation of nitrogen compound metabolic process	5.285707 E-05	5.912233 E-03
	regulation of signal transduction	6.947091 E-05	2.172887 E-07
	positive regulation of macromolecule metabolic process	8.754954 E-05	4.112816 E-06
	regulation of phosphate metabolic process	1.174960 E-04	5.786615 E-05
	regulation of epidermal growth factor receptor signaling pathway	1.655576 E-04	6.609086 E-03
	regulation of phosphorus metabolic process	1.656834 E-04	9.164899 E-05
	regulation of localization	2.630856 E-04	4.045755 E-07
	regulation of signaling	2.752195 E-04	3.394536 E-10
	regulation of ERBB signaling pathway	2.853452 E-04	8.480727 E-03
	regulation of receptor activity	3.147363 E-04	1.395910 E-03
	regulation of cell communication	3.213573 E-04	3.893515 E-10
	generation of neurons	4.602696 E-04	1.279336 E-08
	system process	5.401257 E-04	5.351543 E-04
	regulation of peptidyl-tyrosine phosphorylation	1.160651 E-03	4.184825 E-05
	biological regulation	1.956049 E-03	1.553380 E-04
	cell development	2.224163 E-03	8.996749 E-07
	neurogenesis	2.450213 E-03	4.334781 E-08
	energy derivation by oxidation of organic compounds	4.318747 E-03	3.433197 E-03
	pigmentation	5.374205 E-03	7.209608 E-03
	neurofilament cytoskeleton organization	5.832984 E-03	2.670314 E-03
	regulation of nucleocytoplasmic transport	6.909923 E-03	3.784338 E-03
	neuromuscular process	7.450519 E-03	1.823922 E-03
	amino acid transmembrane transport	7.643906 E-03	7.511259 E-03
	sister chromatid biorientation	8.993827 E-03	7.103554 E-03
	negative regulation of biological process	9.024953 E-03	9.755239 E-07
	protein localization to microtubule	9.296345 E-03	5.251968 E-03
GO Cellular Component
	cell part	1.702392 E-31	5.618522 E-03
	cell	2.180583 E-31	5.711639 E-03
	cytoplasm	2.016678 E-11	1.746019 E-03
	intracellular	3.817121 E-09	1.564686 E-03
	intracellular part	1.313915 E-07	4.039735 E-03
	integral to plasma membrane	7.908003 E-07	1.770921 E-03
	plasma membrane	3.243636 E-06	1.700316 E-05
	cell periphery	3.439271 E-06	5.528751 E-06
	intrinsic to plasma membrane	3.465555 E-06	2.824772 E-03
	dendritic shaft	3.026148 E-04	4.206708 E-03
Mouse Phenotype
	absent mesangial cell	0.000000e+00	2.241643 E-03
	absent hair follicle inner root sheath	2.518950 E-308	6.570332 E-04
	abnormal coat/hair pigmentation	1.010993 E-202	1.050438 E-03
	abnormal hair follicle melanocyte morphology	7.919674 E-199	2.722333 E-03
	abnormal ovary physiology	1.467973 E-195	2.722333 E-03
	small pituitary gland	2.059511 E-179	2.990286 E-03
	abnormal melanocyte morphology	6.523623 E-171	1.199951 E-03
	abnormal pituitary gland size	8.771269 E-169	9.527712 E-05
	decreased renal glomerulus number	2.424365 E-159	9.527712 E-05
	skin edema	8.521914 E-158	1.058883 E-03
	abnormal neuronal precursor cell number	2.782079 E-151	1.249171 E-03
	pigmentation phenotype	6.588348 E-141	1.214724 E-03
	impaired branching involved in ureteric bud morphogenesis	2.439113 E-136	1.782651 E-03
	variegated coat color	3.053332 E-133	7.432497 E-04
	abnormal olfactory system morphology	2.582418 E-130	6.609086 E-03
	abnormal branching involved in ureteric bud morphogenesis	4.521219 E-130	5.303323 E-04
	renal hypoplasia	1.286868 E-129	5.987454 E-05
	diluted coat color	7.588252 E-129	3.133456 E-04
	abnormal ureteric bud morphology	2.293315 E-119	7.207012 E-04
	irregular coat pigmentation	8.862228 E-118	2.188800 E-03
	tonic seizures	3.326340 E-108	1.681951 E-03
	abnormal hair follicle morphology	2.194098 E-104	6.725253 E-03
	abnormal skin adnexa morphology	2.476406 E-104	3.401711 E-04
	abnormal pituitary gland morphology	1.643968 E-102	2.653139 E-05
	abnormal nose morphology	4.916472 E-98	2.463170 E-03
	abnormal kidney development	8.026654 E-98	7.170543 E-05
	partial lethality at weaning	1.289338 E-97	2.556841 E-03
	abnormal pregnancy	5.958987 E-97	2.885515 E-03
	abnormal skin condition	2.388673 E-96	7.857420 E-04
	abnormal neuroendocrine gland morphology	1.643094 E-94	2.220611 E-05
	abnormal urinary system development	1.681425 E-87	1.088222 E-05
	abnormal fluid regulation	3.342507 E-84	2.269020 E-05
	microphthalmia	7.692324 E-79	8.692571 E-03
	abnormal heart and great artery attachment	9.584437 E-79	6.598302 E-05
	premature death	5.727140 E-77	5.262920 E-04
	abnormal growth hormone level	3.835861 E-76	7.316125 E-03
	partial postnatal lethality	1.682907 E-75	3.516088 E-05
	impaired behavioral response to xenobiotic	4.650264 E-75	9.153249 E-06
	small kidney	7.676251 E-75	1.655977 E-03
	abnormal respiratory system development	1.153461 E-72	6.687331 E-04
	abnormal B cell differentiation	5.023725 E-71	4.517007 E-03
	integument phenotype	5.475521 E-70	1.550938 E-06
	ventricular septal defect	6.955799 E-69	1.177259 E-03
	cyanosis	1.089200 E-68	3.257232 E-04
	postnatal growth retardation	1.092253 E-67	6.965974 E-05
	abnormal postnatal growth	9.782367 E-66	8.754159 E-05
	abnormal diencephalon morphology	5.471740 E-64	5.448374 E-06
	increased susceptibility to pharmacologically induced seizures	1.876000 E-62	6.641861 E-05
	abnormal oxygen level	2.631501 E-62	8.006349 E-04
	abnormal eye development	8.266750 E-62	2.716288 E-06
	lethality at weaning	4.279156 E-59	8.459948 E-03
	partial prenatal lethality	1.099485 E-58	3.765948 E-03
	abnormal seizure response to pharmacological agent	8.498543 E-57	3.571829 E-05
	abnormal interventricular septum morphology	5.726002 E-56	6.693100 E-03
	partial neonatal lethality	3.670476 E-55	5.650068 E-03
	embryonic growth retardation	3.955135 E-54	1.885935 E-03
	convulsive seizures	1.030657 E-53	1.030001 E-05
	abnormal internal female genitalia morphology	2.618738 E-53	5.391791 E-03
	abnormal anterior eye segment morphology	3.458670 E-53	4.999043 E-03
	decreased body weight	2.228301 E-52	3.024972 E-07
	abnormal neuron differentiation	3.521944 E-52	1.246064 E-06
	abnormal female genitalia morphology	6.357949 E-52	2.889967 E-03
	abnormal female reproductive system morphology	1.129844 E-51	3.364221 E-03
	muscle phenotype	2.035682 E-50	1.756553 E-03
	prenatal growth retardation	3.263216 E-50	2.132378 E-04
	abnormal heart septum morphology	4.429238 E-50	1.954571 E-03
	abnormal response to new environment	2.369989 E-49	9.684945 E-04
	reduced long term potentiation	5.217421 E-49	6.295630 E-03
	abnormal developmental patterning	2.618112 E-46	1.633193 E-03
	edema	4.240132 E-46	4.864153 E-05
	abnormal response to novelty	7.141624 E-46	3.500162 E-04
	postnatal lethality	9.072606 E-46	8.027945 E-07
	abnormal skin morphology	3.634963 E-45	1.771769 E-03
	abnormal gland physiology	4.935987 E-45	5.287900 E-03
	abnormal body weight	7.149060 E-44	1.081368 E-05
	decreased circulating insulin level	2.196402 E-43	7.402186 E-03
	abnormal seizure response to inducing agent	7.471914 E-43	1.806151 E-05
	abnormal mouth morphology	2.412594 E-42	9.188322 E-05
	abnormal female reproductive system physiology	3.793942 E-42	6.174913 E-04
	abnormal orofacial morphology	4.346054 E-42	1.111018 E-04
	abnormal energy balance	8.899415 E-42	4.590128 E-03
	hemorrhage	1.182508 E-41	1.391945 E-03
	abnormal gas homeostasis	5.508492 E-41	9.454227 E-03
	abnormal nervous system physiology	1.157676 E-40	1.428751 E-11
	decreased body size	4.151604 E-40	1.652087 E-09
	complete embryonic lethality during organogenesis	4.192553 E-40	5.340058 E-06
	abnormal long term potentiation	2.163266 E-38	1.840399 E-04
	abnormal neuron physiology	2.496062 E-38	4.517351 E-05
	abnormal circulating pituitary hormone level	2.707969 E-38	7.998822 E-03
	abnormal behavioral response to xenobiotic	1.586238 E-37	3.219683 E-07
	abnormal extraembryonic tissue morphology	3.636850 E-35	1.490739 E-03
	abnormal embryonic growth/weight/body size	7.396753 E-35	1.239392 E-05
	abnormal body size	2.435038 E-34	1.152336 E-07
	abnormal posterior eye segment morphology	6.646465 E-34	4.190268 E-04
	abnormal facial morphology	1.053121 E-33	1.775338 E-05
	abnormal digestive system morphology	1.342952 E-33	1.439916 E-03
	abnormal pituitary hormone level	2.256235 E-33	2.611656 E-03
	hyperactivity	3.948413 E-33	2.379844 E-06
	embryonic lethality during organogenesis	6.370634 E-33	1.051685 E-06
	abnormal sensory neuron morphology	3.198568 E-32	2.183724 E-03
	seizures	6.684828 E-32	2.725010 E-08
	complete neonatal lethality	2.121509 E-31	2.309552 E-11
	abnormal head morphology	2.171945 E-31	8.233472 E-06
	lethality during fetal growth through weaning	2.251385 E-31	3.649456 E-15
	abnormal blood circulation	5.641521 E-31	3.131812 E-03
	abnormal postnatal growth/weight/body size	2.797114 E-30	3.124694 E-07
	abnormal forebrain morphology	6.008299 E-30	3.315525 E-10
	abnormal prenatal growth/weight/body size	6.611162 E-30	5.346834 E-07
	abnormal respiratory system morphology	8.472153 E-29	5.601775 E-03
	abnormal cardiovascular development	7.216055 E-28	6.057573 E-05
	homeostasis/metabolism phenotype	7.355220 E-28	3.388406 E-04
	abnormal CNS synaptic transmission	2.334834 E-27	3.629406 E-15
	abnormal glucose tolerance	2.730916 E-27	1.766964 E-03
	digestive/alimentary phenotype	3.155748 E-27	6.064222 E-03
	mortality/aging	1.771337 E-26	1.554860 E-11
	abnormal somatic sensory system morphology	2.280458 E-26	5.376594 E-03
	neonatal lethality	5.417081 E-26	1.784995 E-11
	impaired coordination	1.862151 E-25	1.796253 E-04
	abnormal survival	2.366393 E-25	2.317836 E-11
	hypoactivity	7.474311 E-25	5.091647 E-03
	abnormal somatic nervous system morphology	9.339809 E-25	1.793926 E-05
	abnormal nervous system development	1.832487 E-23	1.353607 E-09
	abnormal synaptic transmission	1.637489 E-22	5.238783 E-15
	abnormal craniofacial morphology	7.353254 E-22	5.164691 E-07
	abnormal blood vessel morphology	9.632107 E-22	3.446179 E-05
	abnormal emotion/affect behavior	1.255523 E-21	1.928917 E-06
	growth/size phenotype	2.737761 E-21	3.996176 E-09
	preweaning lethality	3.713339 E-21	4.310168 E-12
	embryonic lethality	1.545367 E-20	2.999751 E-05
	abnormal circulating glucose level	6.283559 E-20	6.550875 E-03
	abnormal homeostasis	6.617654 E-20	5.283437 E-03
	nervous system phenotype	9.443731 E-20	2.177878 E-13
	abnormal learning/memory/conditioning	4.536342 E-19	3.793893 E-06
	abnormal cell differentiation	4.762436 E-19	5.227520 E-06
	abnormal heart morphology	5.626458 E-19	3.245165 E-04
	abnormal eating behavior	1.539799 E-18	9.388679 E-03
	perinatal lethality	2.437365 E-18	9.099067 E-14
	abnormal brain morphology	7.690109 E-18	1.684649 E-08
	respiratory system phenotype	1.353643 E-17	1.480932 E-05
	abnormal adipose tissue amount	1.556623 E-17	1.095021 E-03
	abnormal cardiovascular system morphology	2.718176 E-16	9.813567 E-07
	abnormal embryogenesis/ development	5.623725 E-16	8.815022 E-07
	abnormal neuron morphology	6.196532 E-16	4.885743 E-09
	abnormal eye morphology	9.820744 E-16	2.683819 E-04
	prenatal lethality	4.907901 E-15	2.102552 E-06
	vision/eye phenotype	5.652012 E-15	1.505289 E-04
	abnormal motor coordination/ balance	9.092008 E-15	3.438833 E-07
	normal phenotype	1.051666 E-14	2.902568 E-06
	no abnormal phenotype detected	1.435007 E-14	5.280613 E-06
	abnormal reflex	1.576826 E-14	4.971050 E-04
	abnormal cardiovascular system physiology	6.722338 E-13	5.680151 E-06
	abnormal adipose tissue morphology	2.913413 E-12	6.740017 E-04
	adipose tissue phenotype	4.698206 E-12	6.767529 E-04
	abnormal circulating hormone level	1.167854 E-11	8.029158 E-03
	abnormal locomotor activation	1.324282 E-10	5.325387 E-05
	abnormal involuntary movement	1.625635 E-10	1.273349 E-03
	abnormal sensory capabilities/reflexes/nociception	2.714460 E-10	3.210857 E-05
	absent vibrissae	6.257249 E-10	5.887497 E-03
	abnormal hormone level	7.848908 E-10	5.789110 E-04
	cardiovascular system phenotype	9.200698 E-10	8.230606 E-08
	abnormal nasal cavity morphology	2.595278 E-08	6.381356 E-03
	thin skin	5.734863 E-08	5.797877 E-05
	abnormal nervous system morphology	8.331545 E-07	5.500831 E-10
	mammalian phenotype	2.199604 E-06	4.251343 E-11
	abnormal cell physiology	2.497060 E-06	3.662620 E-04
	cellular phenotype	3.858058 E-06	6.873725 E-04
	abnormal locomotor behavior	4.052033 E-06	2.951168 E-05
	impaired swimming	2.384295 E-05	5.297962 E-05
	abnormal voluntary movement	4.347276 E-05	1.624426 E-05
	absent corpus callosum	4.362806 E-05	1.250517 E-04
	abnormal anterior commissure morphology	4.601375 E-05	8.984899 E-05
	abnormal vibrissa morphology	8.613217 E-05	3.693061 E-03
	abnormal hippocampal commissure morphology	2.766709 E-04	9.888961 E-04
	increased B cell apoptosis	4.437284 E-04	1.744728 E-03
	abnormal B cell proliferation	5.791496 E-04	6.914001 E-03
	abnormal B cell apoptosis	1.509753 E-03	7.499217 E-03
	increased thigmotaxis	1.938088 E-03	2.865253 E-03
	decreased renal tubule number	2.297744 E-03	4.487080 E-03
	eyelids open at birth	2.462864 E-03	1.326352 E-04
	abnormal loop of Henle morphology	2.986385 E-03	3.061870 E-03
	abnormal synaptic vesicle recycling	3.264558 E-03	3.045780 E-05
	prolonged RR interval	6.667159 E-03	4.487080 E-03
	absent aorticopulmonary septum	8.714332 E-03	5.981650 E-04
	absent brain ependyma motile cilia	8.903690 E-03	7.103554 E-03
	common truncal valve	9.883570 E-03	6.570332 E-04
Human Phenotype
	Aplasia/Hypoplasia involving the nose	0.0001218451	0.002097897
	Con E-shaped epiphyses of the proximal phalanges of the hand	0.0001429933	0.007103554
	Abnormality of the voice	0.0010142270	0.002341812
	Superior pectus carinatum	0.0060095400	0.007103554
	Neurofibrosarcoma	0.0060095400	0.007103554
Disease Ontology
	astrocytoma	2.562634 E-56	5.833454 E-04
	primary brain tumor	5.831689 E-56	6.200094 E-04
	malignant neoplasm of brain	1.765898 E-55	8.359448 E-04
	neoplasm of cerebrum	2.767771 E-54	4.104049 E-04
	supratentorial neoplasm	5.244105 E-54	4.640469 E-04
	head neoplasm	8.452192 E-52	1.609512 E-04
	medical disorder	1.751927 E-51	1.212472 E-05
	substance dependence	4.621625 E-37	3.510459 E-04
	bipolar disease	7.501941 E-37	3.958359 E-03
	substanc E-related disease	1.672537 E-34	1.684060 E-03
	malignant glioma	6.846365 E-33	1.922390 E-08
	malignant neoplasm of central nervous system	1.303836 E-31	3.563850 E-07
	malignant neoplasm of nervous system	1.547943 E-31	2.537462 E-07
	chronic rejection of renal transplant	7.662835 E-27	9.392159 E-03
	transplant-related disease	7.751519 E-27	9.554085 E-03
	kidney disease	1.167835 E-26	3.291155 E-03
	autism	1.379588 E-26	6.512625 E-05
	urinary system disease	7.180102 E-26	3.154551 E-03
	autism spectrum disease	1.916828 E-25	1.101546 E-04
	glioma	1.329918 E-23	2.896896 E-08
	brain neoplasm	3.436847 E-23	1.682558 E-08
	immune system disease	6.365893 E-23	1.919066 E-03
	pervasive developmental disease	7.327619 E-23	2.914966 E-04
	central nervous system neoplasm	7.352454 E-23	2.577297 E-08
	connective tissue disease	6.156096 E-22	1.028185 E-03
	glandular and epithelial neoplasm	5.691533 E-19	9.702812 E-08
	schizophrenia	5.272535 E-18	1.676636 E-09
	developmental disease of mental health	5.401273 E-18	1.640948 E-04
	psychotic disease	5.715239 E-18	1.985933 E-09
	brain disease	4.721729 E-15	6.285831 E-10
	cognitive disease	2.912002 E-14	1.193015 E-06
	neural neoplasm	1.403081 E-13	1.785181 E-07
	nervous system cancer	1.562079 E-13	4.495548 E-08
	prostate carcinoma	1.782726 E-13	9.305559 E-03
	neuroepithelial neoplasm	2.386201 E-13	2.053716 E-07
	syndrome	5.491455 E-13	5.334819 E-04
	central nervous system disease	5.943979 E-13	7.287452 E-08
	disease of anatomical entity	1.340620 E-10	1.645207 E-06
	musculoskeletal system disease	2.831781 E-09	5.046677 E-04
	disease	1.192943 E-08	2.981320 E-11
	nervous system disease	1.774511 E-08	1.349728 E-06
	carcinoma	1.911525 E-08	3.586774 E-06
	disease of mental health	2.221996 E-06	1.160002 E-07
	reproductive system cancer	2.756597 E-06	2.710334 E-04
	bone structure disease	6.846934 E-04	5.981650 E-04
	adenoma	1.390751 E-03	2.582085 E-03
	chief cell adenoma	3.275573 E-03	2.241643 E-03
MSigDB Oncogenic Signatures
	Genes down-regulated in MEF cells (embryonic fibroblasts) with knockout of SNF5 [Gene ID=6598] gene.	1.898113 E-47	0.0016104710
	Genes up-regulated in four lineages of epithelial cell lines over-expressing an oncogenic form of KRAS [Gene ID=3845] gene.	7.006140 E-46	0.0003641511
	Genes up-regulated in four lineages of epithelial cell lines over-expressing an oncogenic form of KRAS [Gene ID=3845] gene.	3.477242 E-26	0.0002211939
	Genes up-regulated in early serum response of CRL 2091 cells (foreskin fibroblasts).	9.068174 E-15	0.0019245450
	Genes down-regulated in mouse fibroblasts over-expressing E2F1 [Gene ID=1869] gene.	1.933828 E-11	0.0089482650
	Genes down-regulated in myometrial cells over-expressing a shortened splice form of ATF2 [Gene ID=1386] gene.	1.387290 E-09	0.0018616130
MSigDB Immunologic Signatures
	Genes down-regulated in comparison of polysome bound (translated) mRNA versus total mRNA 4 h after LPS (TLR4 agonist) stimulation.	3.897086 E-108	4.085701 E-03
	Genes up-regulated in comparison of memory IgM B cells versus plasma cells from bone marrow and blood.	5.876814 E-70	5.460239 E-03
	Genes down-regulated in comparison of effector CD8 T cells at the peak expansion phase (day8) versus those at contraction (day 15) after LCMV-Armstrong infection.	1.814356 E-54	3.669790 E-04
	Genes down-regulated in comparison of dendritic cells (DC) exposed to 5 worms/well B. malayi versus DC exposed to M. tuberculosis	2.963732 E-16	9.986053 E-03
	Genes down-regulated in comparison of dendritic cells (DC) stimulated with R848 at 8 h versus DCs stimulated with LPS (TLR4 agonist) for 8 h.	9.015079 E-14	6.090462 E-04
	Genes down-regulated in comparison of dendritic cells (DC) stimulated with R848 at 8 h versus DCs stimulated with LPS (TLR4 agonist) and R848 for 8 h.	9.088216 E-13	3.501904 E-03
	Genes up-regulated in comparison of untreated CD4 [GeneID=920] T cells at 0 h versus the untreated cells at 2 h.	2.307255 E-11	1.146187 E-03
	Genes up-regulated in comparison of untreated CD4 [GeneID=920] T cells at 0 h versus the untreated cells at 6 h.	6.495698 E-11	1.417828 E-04
	Genes up-regulated in comparison of untreated wild type macrophages at 4 h versus those from IRAK4 [GeneID=51135] deficient mice at 4 h.	9.235334 E-09	3.519543 E-03
	Genes down-regulated in comparison of NK cells treated with IL15 [GeneID=3567] versus untreated NK cells.	2.639251 E-07	3.793993 E-03
	Genes up-regulated in comparison of untreated CD4 [GeneID=920] T cells at 0 h versus the cells treated with IL4 [GeneID=3565] and anti-IL12 at 24 h.	6.230137 E-07	1.572491 E-03
	Genes up-regulated in comparison of untreated CD4 [GeneID=920] T cells at 0 h versus the cells treated with IL4 [GeneID=3565] and anti-IL12 at 6 h.	7.471850 E-07	6.874689 E-03
	Genes up-regulated in comparison of dendritic cells (DC) stimulated with Pam3Csk4 (TLR1/2 agonist) at 16 h versus DC cells stimulated with Gardiquimod (TLR7 agonist) at 16 h.	1.339322 E-06	5.402801 E-03
	Genes up-regulated in comparison of untreated CD4 [GeneID=920] T cells versus the untreated CD8 T cells.	1.324388 E-04	2.611656 E-03
	Genes down-regulated in comparison of naive CD8 T cells versus naive CD4 [GeneID=920] CD8 T cells.	4.149127 E-04	6.411514 E-05
	Genes down-regulated in comparison of plasmacytoid dendritic cells (pDC) from TIV influenza vaccinee pr E-vaccination versus those at day 7 post-vaccination.	8.575051 E-04	1.141027 E-03
	Genes down-regulated in comparison of control dendritic cells (DC) at 12 h versus those stimulated with LPS (TLR4 agonist) at 12 h.	1.927280 E-03	1.018622 E-03
	Genes up-regulated in comparison of dendritic cells (DC) stimulated with Pam3Csk4 (TLR1/2 agonist) at 1 h versus DC cells stimulated with Gardiquimod (TLR7 agonist) at 1 h.	3.192942 E-03	2.242510 E-03
	Genes up-regulated in comparison of TregCD103-Klrg1 versus TconvLP (see Table 1S in the paper for details).	4.119388 E-03	4.376653 E-03
	Genes down-regulated in comparison of thymus conventional T cells versus fat tissue conventional T cells.	4.119549 E-03	2.406320 E-03
	Genes down-regulated in comparison of dendritic cells (DC) stimulated with CpG DNA (TLR9 agonist) at 1 h versus DC cells stimulated with Gardiquimod (TLR7 agonist) at 1 h.	5.290238 E-03	7.696430 E-03
	Genes down-regulated in comparison of control dendritic cells (DC) at 24 h versus those stimulated with poly(I:C) (TLR3 agonist) at 24 h.	5.651789 E-03	3.787898 E-03
MSigDB Cancer Neighborhood
	Neighborhood of UBE2N	7.575076 E-07	6.284620 E-03
	Neighborhood of DNM1	1.218670 E-03	3.602481 E-10
PANTHER Pathway
	5HT2 type receptor mediated signaling pathway	7.189078 E-89	9.504961 E-06
	Heterotrimeric G-protein signaling pathway-Gi alpha and Gs alpha mediated pathway	5.147843 E-50	5.746194 E-05
	Alzheimer diseas E-presenilin pathway	2.226550 E-05	9.130151 E-04
MSigDB Pathway
	BMP receptor signaling	1.545766 E-106	7.323631 E-03
	Genes involved in Netrin-1 signaling	9.387803 E-91	3.630294 E-03
	Gap junction	5.338283 E-64	7.995463 E-03
	Genes involved in G alpha (q) signalling events	7.778731 E-54	2.363987 E-04
	Genes involved in Gastrin-CREB signalling pathway via PKC and MAPK	3.510756 E-51	1.587640 E-04
	Calcium signaling pathway	8.072738 E-44	1.162366 E-05
	Non-small cell lung cancer	7.386979 E-27	5.208874 E-04
	Neuroactive ligand-receptor interaction	3.390434 E-25	1.766552 E-04
	Sonic Hedgehog (Shh) Pathway	3.071352 E-04	1.357528 E-03
	Genes involved in Inhibition of voltage gated Ca2+ channels via Gbeta/gamma subunits	1.299341 E-03	3.697439 E-03
	IL8- and CXCR2-mediated signaling events	2.393520 E-03	3.512177 E-04
	Genes involved in GABA receptor activation	5.444852 E-03	7.161760 E-05
	Regulation And Function Of ChREBP in Liver	6.281476 E-03	1.250517 E-04
	Genes involved in Platelet activation, signaling and aggregation	8.301343 E-03	1.201920 E-03
MGI Expression: Detected
	TS24_4th ventricle choroid plexus	0.000000e+00	7.103554 E-03
	TS15_future brain floor plate	0.000000e+00	7.103554 E-03
	TS21_lower jaw incisor epithelium	3.621515 E-207	6.381356 E-03
	TS21_upper jaw incisor	1.159758 E-203	8.395616 E-03
	TS22_glomerulus	1.104830 E-179	5.613320 E-05
	TS21_lower jaw incisor	1.804064 E-179	7.675582 E-04
	TS15_neural tube floor plate	1.626957 E-177	6.381356 E-03
	TS19_outflow tract	8.872522 E-160	6.246445 E-03
	TS23_pons marginal layer	9.061946 E-160	8.224169 E-06
	TS22_metanephros cortex	1.800233 E-147	3.538575 E-04
	TS22_excretory component	5.337059 E-144	4.305498 E-04
	TS18_1st branchial arch mandibular component	3.881383 E-143	7.511259 E-03
	TS13_primitive streak	1.884716 E-142	3.845774 E-03
	TS12_lateral plate mesenchyme	1.095278 E-139	6.378455 E-03
	TS20_arterial system	4.819305 E-136	3.213875 E-03
	TS18_1st branchial arch	1.879506 E-128	2.097897 E-03
	TS15_surface ectoderm	9.624725 E-125	5.079359 E-03
	TS15_optic vesicle	4.483750 E-124	1.717716 E-05
	TS17_oral region	4.127350 E-119	9.769495 E-04
	TS20_olfactory epithelium	1.605528 E-118	5.559481 E-04
	TS23_choroid plexus	1.534740 E-117	1.018443 E-03
	TS15_embryo ectoderm	1.146004 E-115	7.513982 E-03
	TS28_caecum	9.253598 E-109	2.024307 E-03
	TS21_tooth	1.481669 E-107	1.762746 E-04
	TS18_branchial arch	7.882515 E-106	7.955300 E-05
	TS21_lower jaw	8.322833 E-106	1.773582 E-03
	TS24_metencephalon lateral wall	5.686553 E-104	5.215452 E-03
	TS21_jaw	5.996929 E-104	4.774568 E-04
	TS24_metencephalon	2.937598 E-102	6.486729 E-03
	TS28_adipose tissue	2.855739 E-100	1.010890 E-03
	TS17_lens pit	7.391754 E-99	7.926028 E-04
	TS20_nasal cavity epithelium	7.653378 E-99	3.498457 E-04
	TS19_tail	3.695920 E-95	3.958359 E-03
	TS28_integumental system	1.186982 E-94	6.115396 E-03
	TS11_neural ectoderm	8.843222 E-94	1.829852 E-03
	TS20_nasal cavity	5.324828 E-92	1.228545 E-04
	TS12_trunk mesenchyme	6.205894 E-88	1.408028 E-03
	TS28_cerebellum external granule cell layer	2.097827 E-86	8.981754 E-04
	TS24_hindbrain	4.909747 E-85	1.136470 E-03
	TS20_maxillary process	5.780334 E-85	1.678799 E-05
	TS20_spinal cord lateral wall	1.146443 E-81	7.312759 E-05
	TS28_oral region	3.671529 E-81	6.708285 E-05
	TS19_dorsal root ganglion	1.164590 E-79	4.065265 E-03
	TS19_spinal ganglion	1.104530 E-77	7.382970 E-03
	TS20_nose	2.857945 E-77	7.987687 E-07
	TS17_optic cup	5.581896 E-77	8.046470 E-07
	TS19_peripheral nervous system spinal component	1.451878 E-76	8.492320 E-03
	TS15_otocyst	2.771260 E-74	8.676391 E-05
	TS11_embryo mesoderm	7.565016 E-74	2.647963 E-03
	TS11_embryo ectoderm	1.823642 E-73	3.395205 E-04
	TS19_peripheral nervous system	4.749548 E-72	1.772879 E-03
	TS28_endocrine system	9.908796 E-72	2.636970 E-03
	TS23_spinal cord ventricular layer	8.622886 E-71	5.048164 E-03
	TS12_embryo mesenchyme	2.562728 E-70	6.687331 E-04
	TS28_stomach	1.037568 E-69	6.459505 E-03
	TS23_vomeronasal organ	1.077503 E-67	3.570818 E-04
	TS19_heart	1.624865 E-65	1.331967 E-03
	TS17_alimentary system	2.413975 E-65	1.384756 E-06
	TS15_eye	5.187709 E-65	6.018918 E-09
	TS21_oral region	1.311765 E-62	3.731635 E-05
	TS20_oral region	4.271317 E-61	5.557981 E-05
	TS19_gut	1.597303 E-60	5.928926 E-04
	TS15_inner ear	3.968505 E-60	6.868228 E-06
	TS15_ear	1.951649 E-59	4.892190 E-06
	TS20_dorsal root ganglion	3.425149 E-59	7.160958 E-04
	TS14_embryo mesenchyme	2.789842 E-58	3.262036 E-03
	TS12_neural ectoderm	4.074981 E-57	2.814898 E-03
	TS17_diencephalon	7.165852 E-57	5.357179 E-04
	TS20_peripheral nervous system spinal component	3.384298 E-56	5.956580 E-04
	TS15_trunk somite	1.363133 E-55	7.148517 E-03
	TS20_spinal ganglion	1.829678 E-55	8.610838 E-04
	TS12_embryo ectoderm	4.183345 E-55	2.251030 E-03
	TS23_pons ventricular layer	6.854762 E-54	2.466818 E-03
	TS28_skeletal muscle	6.890773 E-54	7.503265 E-04
	TS20_peripheral nervous system	4.382897 E-52	3.570818 E-04
	TS14_central nervous system	1.312622 E-51	1.710559 E-05
	TS14_nervous system	2.574361 E-51	2.297649 E-05
	TS21_alimentary system	1.039731 E-50	8.599641 E-06
	TS19_trunk somite	1.725272 E-50	2.980379 E-05
	TS17_limb mesenchyme	1.762871 E-50	9.501933 E-05
	TS28_intestine	9.119966 E-50	6.619748 E-03
	TS28_cerebellum purkinje cell layer	1.299642 E-49	3.910166 E-06
	TS19_trunk paraxial mesenchyme	2.273430 E-49	4.454989 E-05
	TS28_cerebellum granule cell layer	2.595322 E-49	5.325805 E-08
	TS15_1st branchial arch	4.043228 E-49	4.152370 E-04
	TS28_gallbladder	1.030739 E-48	2.512692 E-03
	TS19_cardiovascular system	1.760290 E-48	8.462332 E-03
	TS13_embryo mesenchyme	2.466247 E-48	2.841495 E-05
	TS28_tooth	5.302743 E-47	3.733923 E-04
	TS28_testis	7.791706 E-47	3.185088 E-03
	TS23_diencephalon lateral wall ventricular layer	8.170357 E-47	3.744509 E-04
	TS28_muscle	5.608447 E-46	2.561552 E-04
	TS28_gastrointestinal system	7.078305 E-46	1.305231 E-03
	TS17_eye	8.433498 E-46	2.816001 E-06
	TS4_second polar body	2.023873 E-45	2.878930 E-03
	TS4_zona pellucida	2.023873 E-45	2.878930 E-03
	TS28_liver and biliary system	2.760121 E-44	8.545702 E-03
	TS20_cerebral cortex ventricular layer	3.161963 E-44	8.229136 E-03
	TS28_haemolymphoid system	5.304201 E-44	7.052288 E-03
	TS23_tail	1.852709 E-43	1.752571 E-08
	TS28_male reproductive system	3.036820 E-43	8.210091 E-03
	TS28_adrenal gland	8.439778 E-43	6.837664 E-04
	TS17_trunk somite	2.950548 E-42	4.272544 E-04
	TS19_trunk mesenchyme	5.937701 E-42	1.260382 E-05
	TS28_tongue	1.025345 E-41	9.037641 E-04
	TS17_trunk paraxial mesenchyme	2.665538 E-41	6.328920 E-04
	TS15_limb	2.776835 E-41	3.363500 E-07
	TS28_kidney	3.078767 E-41	4.251519 E-05
	TS20_cardiovascular system	4.460483 E-41	2.455713 E-03
	TS23_medulla oblongata alar plate	4.634862 E-41	7.017571 E-09
	TS19_alimentary system	5.589175 E-41	2.115529 E-07
	TS19_limb mesenchyme	7.232408 E-41	1.290579 E-03
	TS23_ganglionic eminence	2.426252 E-40	6.537202 E-07
	TS28_epididymis	5.513083 E-40	7.009178 E-03
	TS23_embryo mesenchyme	1.713895 E-39	2.655315 E-03
	TS28_skin	1.403923 E-38	5.551302 E-03
	TS15_trunk mesenchyme	1.922062 E-38	3.402261 E-03
	TS28_renal-urinary system	8.776150 E-38	1.149772 E-04
	TS28_urinary bladder	1.449633 E-37	8.406266 E-04
	TS15_sensory organ	4.468231 E-37	9.205279 E-10
	TS17_trunk mesenchyme	2.067915 E-36	1.225181 E-04
	TS28_amygdala	5.419470 E-36	4.512010 E-08
	TS20_sensory organ	1.033994 E-35	2.444090 E-09
	TS28_basal ganglia	3.098505 E-35	4.336637 E-08
	TS17_midbrain	4.621410 E-35	3.159768 E-09
	TS20_spinal cord	1.093229 E-34	8.133585 E-07
	TS17_branchial arch	1.493795 E-34	4.814617 E-08
	TS28_cerebellar cortex	4.641402 E-34	9.983508 E-09
	TS13_neural ectoderm	7.781834 E-34	1.037660 E-05
	TS22_visceral organ	2.239712 E-33	3.358533 E-06
	TS20_cerebral cortex	2.955318 E-33	2.449413 E-04
	TS28_lung	4.386272 E-33	5.027211 E-04
	TS20_alimentary system	4.789927 E-33	5.996978 E-06
	TS28_respiratory system	1.664487 E-32	5.300631 E-04
	TS13_embryo ectoderm	3.785169 E-32	2.069729 E-05
	TS19_embryo mesenchyme	6.592000 E-32	3.884936 E-07
	TS28_brainstem	1.069979 E-31	1.268989 E-07
	TS23_telencephalon ventricular layer	1.321933 E-31	4.422229 E-04
	TS28_heart	1.989556 E-31	7.888771 E-07
	TS4_extraembryonic component	3.181407 E-31	1.718158 E-04
	TS17_neural tube	5.020941 E-31	2.692576 E-03
	TS17_hindbrain	7.332249 E-31	1.198993 E-05
	TS14_organ system	1.970034 E-30	1.383600 E-06
	TS15_branchial arch	2.482861 E-30	7.357332 E-04
	TS28_uterus	4.526531 E-30	5.686365 E-04
	TS20_eye	5.930571 E-30	7.629538 E-07
	TS28_oocyte	6.925355 E-30	3.773996 E-04
	TS28_cardiovascular system	8.099717 E-30	3.455923 E-07
	TS17_limb	8.868379 E-30	2.291974 E-08
	Theiler_stage_25	2.042229 E-29	2.037141 E-04
	TS28_reproductive system	4.039469 E-29	1.267027 E-03
	TS25_embryo	5.069893 E-29	3.325214 E-04
	TS15_embryo mesenchyme	9.441872 E-29	5.576024 E-04
	TS20_telencephalon	1.217883 E-28	4.954964 E-07
	TS19_visceral organ	1.681256 E-28	3.686691 E-05
	TS22_pituitary gland	3.306513 E-28	1.474514 E-06
	TS4_embryo	4.368018 E-28	1.352428 E-03
	Theiler_stage_4	9.375153 E-28	1.375666 E-03
	TS28_female germ cell	4.188904 E-27	1.008431 E-04
	TS17_forebrain	5.817626 E-27	2.382409 E-06
	TS28_ovary	8.192025 E-27	1.303780 E-04
	TS17_visceral organ	1.083310 E-26	3.086085 E-07
	TS3_4-8 cell stage embryo	4.208913 E-26	4.670677 E-03
	Theiler_stage_5	1.031479 E-25	3.274585 E-03
	TS23_cardiovascular system	1.271556 E-25	4.824473 E-04
	TS12_embryo	1.499986 E-25	8.276765 E-03
	TS28_hypothalamus	2.012148 E-25	8.264968 E-09
	TS17_sensory organ	2.674155 E-25	8.149979 E-10
	TS15_future brain	3.174850 E-25	2.472741 E-07
	Theiler_stage_3	5.937574 E-25	6.761798 E-03
	Theiler_stage_12	1.009095 E-24	7.824816 E-03
	TS28_thalamus	1.434323 E-24	1.481460 E-10
	TS28_visceral organ	2.737480 E-24	4.135596 E-04
	TS28_small intestine	4.845284 E-24	9.649867 E-03
	TS17_embryo mesenchyme	4.647009 E-23	2.019495 E-07
	TS24_telencephalon	9.119671 E-23	6.299959 E-08
	TS17_future spinal cord	1.940572 E-22	4.940481 E-03
	TS23_rest of cerebellum	3.560913 E-22	2.403569 E-08
	TS28_midbrain	3.916921 E-22	5.194193 E-10
	TS22_heart	3.951297 E-22	1.150490 E-11
	TS19_limb	6.792651 E-22	1.263274 E-07
	TS28_spinal cord	8.623367 E-22	3.639047 E-10
	TS28_diencephalon	1.547684 E-21	1.685696 E-11
	TS24_forebrain	3.797627 E-21	8.311791 E-09
	TS21_embryo	5.059347 E-21	2.122263 E-08
	TS22_oral region	7.137610 E-21	7.778343 E-07
	TS14_embryo	8.379990 E-21	5.170959 E-05
	Theiler_stage_21	8.950317 E-21	3.113479 E-08
	Theiler_stage_14	1.500042 E-20	3.101812 E-05
	TS28_olfactory bulb	2.636234 E-20	1.635847 E-09
	TS23_nasal cavity epithelium	4.755775 E-20	3.461670 E-08
	TS23_olfactory epithelium	6.137944 E-20	2.233733 E-07
	TS17_brain	2.015013 E-19	1.888698 E-07
	TS28_cerebral cortex	2.217647 E-19	1.987409 E-12
	TS15_central nervous system	6.155011 E-19	3.167602 E-06
	TS22_cardiovascular system	6.697668 E-19	6.895246 E-11
	TS21_visceral organ	1.128492 E-18	4.707148 E-06
	TS20_forebrain	1.231942 E-18	7.823470 E-08
	TS15_nervous system	2.914815 E-18	1.453438 E-06
	TS23_nasal cavity	4.771708 E-18	2.144539 E-08
	TS11_embryo	5.886064 E-18	1.556350 E-03
	TS28_cerebellum	1.044751 E-17	1.865484 E-12
	TS20_visceral organ	1.463725 E-17	4.488067 E-04
	TS23_skeleton	1.628449 E-17	1.348966 E-05
	TS28_eye	2.003883 E-17	8.482532 E-11
	TS28_metencephalon	2.065331 E-17	1.172584 E-12
	TS23_respiratory system	4.072181 E-17	3.638402 E-07
	TS22_metanephros	4.386104 E-17	4.413370 E-04
	TS22_organ system	4.846617 E-17	7.318091 E-13
	TS23_integumental system	2.113461 E-16	4.645716 E-07
	TS23_olfactory bulb	2.207039 E-16	8.442360 E-05
	Theiler_stage_11	2.766981 E-16	2.996612 E-03
	TS24_brain	3.755339 E-16	2.417053 E-13
	TS25_organ system	5.928892 E-16	1.656659 E-04
	TS23_diencephalon lateral wall	1.009899 E-15	1.860077 E-16
	TS24_visceral organ	2.662184 E-15	1.873865 E-03
	TS28_sensory organ	2.919962 E-15	2.099195 E-11
	TS23_pons	6.885342 E-15	3.061236 E-12
	TS16_Rathke's pouch	7.118312 E-15	5.251968 E-03
	TS23_spinal cord lateral wall	9.509231 E-15	1.817842 E-13
	Theiler_stage_22	1.528191 E-14	9.091177 E-13
	TS28_hippocampus	1.546997 E-14	3.771293 E-08
	TS23_metencephalon basal plate	1.964795 E-14	4.244452 E-12
	TS23_limb	2.278250 E-14	2.278422 E-09
	TS28_hindbrain	2.638910 E-14	8.397998 E-13
	TS28_telencephalon	3.374289 E-14	5.167878 E-11
	TS22_embryo	3.490467 E-14	2.872579 E-12
	TS18_embryo ectoderm	3.770417 E-14	5.251968 E-03
	TS24_nervous system	7.129442 E-14	1.111138 E-15
	TS24_central nervous system	7.756895 E-14	3.121049 E-15
	TS20_brain	2.333276 E-13	4.382813 E-08
	TS28_pituitary gland	3.027993 E-13	8.436201 E-04
	TS26_neural retina inner nuclear layer	4.393635 E-13	4.927414 E-05
	TS28_forebrain	4.898727 E-13	3.803377 E-11
	TS28_nervous system	9.173684 E-13	5.794338 E-16
	TS28_central nervous system	9.703596 E-13	1.037092 E-15
	TS22_diencephalon	9.770874 E-13	2.030625 E-11
	TS28_brain	1.252293 E-12	3.609214 E-14
	TS22_renal-urinary system	1.421780 E-12	1.766103 E-06
	TS23_medulla oblongata lateral wall	1.650085 E-12	6.643289 E-13
	TS23_medulla oblongata basal plate	2.197674 E-12	1.705672 E-13
	TS22_cornea	3.359137 E-12	1.498678 E-03
	TS23_nose	1.379876 E-11	4.333379 E-12
	TS23_hippocampus	1.644006 E-11	1.407144 E-08
	TS23_midbrain lateral wall	2.592680 E-11	6.134124 E-09
	TS28_organ system	3.535639 E-11	4.576782 E-13
	TS28_postnatal mouse	4.643991 E-11	2.207718 E-13
	TS23_neocortex	5.564144 E-11	5.324522 E-08
	TS22_alimentary system	7.177297 E-11	3.898087 E-06
	TS28_meninges	9.151335 E-11	1.636641 E-04
	TS23_hindbrain	1.522015 E-10	2.760653 E-18
	TS15_organ system	2.007502 E-10	2.294930 E-10
	TS28_choroid plexus	5.098382 E-10	2.254925 E-04
	TS20_central nervous system	9.408026 E-10	3.160456 E-09
	TS23_medulla oblongata	9.958918 E-10	6.899042 E-12
	TS19_midbrain	1.458009 E-09	4.280396 E-08
	TS19_telencephalon	1.645930 E-09	3.623715 E-09
	TS13_embryo	1.863707 E-09	5.803969 E-05
	TS20_nervous system	2.929536 E-09	7.828415 E-09
	TS28_female reproductive system	3.467966 E-09	3.268417 E-04
	TS16_oral region	4.134994 E-09	3.993568 E-04
	TS17_central nervous system	6.065793 E-09	8.365251 E-07
	TS23_olfactory lobe	6.468225 E-09	4.334642 E-10
	Theiler_stage_13	6.529238 E-09	1.390584 E-04
	TS17_nervous system	1.210358 E-08	2.563227 E-07
	TS19_hindbrain	1.438891 E-08	1.221725 E-08
	TS19_diencephalon	1.530960 E-08	4.691304 E-08
	TS23_hypothalamus	4.072668 E-08	1.248927 E-13
	TS23_telencephalon	6.091216 E-08	4.699242 E-20
	TS19_forebrain	6.429684 E-08	1.383116 E-10
	TS23_reproductive system	1.167949 E-07	1.222887 E-05
	TS19_future spinal cord	3.410978 E-07	3.647102 E-09
	TS23_retina	3.854609 E-07	1.124078 E-11
	TS24_organ system	5.924339 E-07	1.336824 E-11
	TS23_gut	8.340382 E-07	8.833728 E-06
	TS21_organ system	1.232773 E-06	6.607395 E-09
	TS23_forebrain	1.461637 E-06	6.420813 E-22
	TS19_brain	1.967628 E-06	2.088046 E-12
	TS28_corpus striatum	1.999064 E-06	2.485789 E-06
	TS17_organ system	2.215765 E-06	4.047647 E-11
	TS22_facial bone primordium	2.534374 E-06	1.538496 E-04
	TS26_neural retina outer nuclear layer	2.876557 E-06	5.196996 E-04
	TS22_viscerocranium	3.201367 E-06	1.625587 E-04
	TS19_organ system	3.233828 E-06	2.129400 E-14
	TS20_mandible primordium	4.718288 E-06	6.246445 E-03
	TS22_forebrain	5.156710 E-06	2.786579 E-11
	TS26_neural retina nuclear layer	8.269589 E-06	2.766360 E-05
	TS15_embryo	9.325267 E-06	1.709956 E-08
	TS23_eye	2.072583 E-05	2.173215 E-14
	TS25_skin	2.403638 E-05	8.813262 E-03
	TS24_neural retina nuclear layer	2.885157 E-05	9.807476 E-05
	TS23_cerebellum	3.142527 E-05	1.941670 E-12
	Theiler_stage_15	3.474947 E-05	6.036968 E-08
	TS19_central nervous system	3.862023 E-05	2.351097 E-13
	TS22_muscle	3.891685 E-05	5.065386 E-05
	TS26_organ system	3.992596 E-05	2.461369 E-05
	TS23_metencephalon alar plate	4.325665 E-05	1.753964 E-13
	TS26_embryo	4.584780 E-05	1.369886 E-05
	TS28_retina	4.629399 E-05	4.160655 E-11
	TS26_neural retina	5.033892 E-05	4.374873 E-05
	Theiler_stage_26	5.668174 E-05	1.715658 E-05
	TS22_lens	5.841120 E-05	2.080615 E-05
	TS20_organ system	5.867665 E-05	2.506813 E-08
	TS19_nervous system	6.047679 E-05	5.661951 E-14
	TS22_thyroid gland	6.319967 E-05	5.976680 E-03
	TS17_oral epithelium	1.065419 E-04	5.887497 E-03
	TS22_basal forebrain	1.236746 E-04	1.281802 E-06
	TS24_embryo	1.277655 E-04	3.944938 E-11
	TS19_oral epithelium	1.393138 E-04	2.990286 E-03
	Theiler_stage_24	1.537221 E-04	4.892759 E-11
	TS20_embryo	2.260620 E-04	7.127869 E-08
	TS23_cerebral cortex	2.297615 E-04	5.707041 E-13
	Theiler_stage_20	2.448105 E-04	4.575162 E-08
	TS17_embryo	3.203694 E-04	5.227811 E-12
	TS21_stomach	3.465099 E-04	3.693061 E-03
	TS22_brain	4.206973 E-04	3.202164 E-14
	Theiler_stage_17	4.784406 E-04	1.508311 E-11
	TS22_piriform cortex	5.465301 E-04	1.536136 E-07
	TS22_larynx	6.888490 E-04	1.359858 E-10
	TS19_embryo	7.619538 E-04	3.720327 E-14
	TS22_lower respiratory tract	9.508644 E-04	3.484118 E-06
	TS24_neural retina	9.540447 E-04	1.167091 E-05
	TS22_respiratory tract	9.678295 E-04	3.907204 E-06
	Theiler_stage_19	1.067909 E-03	7.543200 E-14
	TS24_skin	1.124323 E-03	1.108286 E-03
	TS20_vibrissa mesenchyme	1.198917 E-03	9.846902 E-03
	TS20_mesonephros tubule	1.212833 E-03	3.993568 E-04
	TS22_vibrissa	1.279729 E-03	5.242472 E-03
	TS22_trachea	1.350673 E-03	9.846985 E-06
	TS22_heart atrium	1.702476 E-03	4.252850 E-08
	TS23_brain	1.879913 E-03	7.203157 E-21
	TS28_retina inner nuclear layer	2.301693 E-03	6.621650 E-07
	TS22_rest of skin	2.483439 E-03	6.333733 E-03
	TS23_alimentary system	2.497472 E-03	3.564077 E-08
	TS22_tooth	3.253621 E-03	7.063905 E-07
	TS22_pretectum	3.297609 E-03	7.819146 E-11
	TS22_jaw	3.322988 E-03	7.814851 E-07
	TS22_palatal shelf	3.488283 E-03	1.011661 E-09
	TS23_central nervous system	3.855620 E-03	6.975215 E-21
	TS22_central nervous system	4.027394 E-03	5.273235 E-13
	TS26_retina	4.269509 E-03	1.051538 E-04
	TS17_embryo ectoderm	4.531571 E-03	5.113216 E-03
	TS23_embryo	4.597141 E-03	8.952591 E-19
	Theiler_stage_23	4.602788 E-03	1.009682 E-18
	TS22_cranium	5.002734 E-03	3.313917 E-03
	TS23_nervous system	5.027739 E-03	3.559043 E-21
	TS23_organ system	5.544645 E-03	9.632968 E-17
	TS22_pallidum	5.604477 E-03	1.222074 E-06
	TS23_forelimb digit mesenchyme	7.213170 E-03	4.487080 E-03
	TS28_retina outer nuclear layer	7.832079 E-03	3.181796 E-04
	TS21_coelomic epithelium of female mesonephros	7.868543 E-03	8.582005 E-06
	TS21_sympathetic nerve trunk	9.619570 E-03	9.846902 E-03
	TS20_nasal septum	9.854586 E-03	1.357528 E-03
MSigDB Perturbation
	Set 'Suz12 targets': genes identified by ChIP on chip as targets of the Polycomb protein SUZ12 [GeneID=23512] in human embryonic stem cells.	7.458955 E-112	2.169020 E-09
	Set 'PRC2 targets': Polycomb Repression Complex 2 (PRC) targets; identified by ChIP on chip on human embryonic stem cells as genes that: posess the trimethylated H3K27 mark in their promoters and are bound by SUZ12 [GeneID=23512] and EED [GeneID=8726] Polycomb proteins.	9.285682 E-74	1.839239 E-05
	Genes consistently up-regulated in HMEC cells (primary mammary epithelium) upon expression of TERT [GeneID=7015] off a retroviral vector.	5.984552 E-68	1.835369 E-04
	Genes with high-CpG-density promoters (HCP) with unmethylated histone H3 in MEF cells (embryonic fibroblast).	2.637799 E-59	6.505339 E-03
	Genes up-regulated in freshly isolated CD31- [GeneID=5175] (stromal stem cells from adipose tissue) versus the CD31+ (non-stem) counterparts.	1.041326 E-58	9.569568 E-05
	Set 'Eed targets': genes identified by ChIP on chip as targets of the Polycomb protein EED [GeneID=8726] in human embryonic stem cells.	2.742274 E-54	4.314897 E-07
	Set 'H3K27 bound': genes posessing the trimethylated H3K27 (H3K27me3) mark in their promoters in human embryonic stem cells, as identified by ChIP on chip.	1.885602 E-50	1.296180 E-08
	Genes down-regulated in BT549 cells (breast cancer) by expression of SMARCE1 [GeneID=6605] off a retroviral vector.	1.206716 E-49	3.647842 E-05
	Genes down-regulated in RWP E-1 cells (prostate cancer) upon expression of constitutively active form of STAT3 [GeneID=6774].	3.365334 E-47	9.883353 E-03
	Genes down-regulated in the neural crest stem cells (NCS), defined as p75+/HNK1+ [GeneID=4804;27087].	1.311424 E-41	6.333733 E-03
	Genes whose DNA is hyper-methylated in hepatocellular carcinoma (HCC) compared to normal liver.	1.956523 E-35	2.502609 E-04
	Genes down-regulated in mesenchymal stem cells (MSC) engineered to express EWS-FLI1 [GeneID=2130;2321] fusion protein.	1.832623 E-34	1.745419 E-04
	Genes with promoters occupied by SMAD2 or SMAD3 [GeneID=4087, 4088] in HaCaT cells (keratinocyte) according to a ChIP-chip analysis.	3.786153 E-30	1.404371 E-05
	Genes up-regulated in T24 (bladder cancer) cells in response to the photodynamic therapy (PDT) stress.	1.644531 E-27	7.949861 E-03
	Genes down-regulated in MDA-MB-231 cells (breast cancer) after knockdown of SATB1 [GeneID=6304] by RNAi.	5.648841 E-22	3.735834 E-04
	Genes up-regulated in the urogenital sinus (UGS) of day E16 females exposed to the androgen dihydrotestosterone [PubChem=10635] for 48 h.	1.248444 E-20	2.340694 E-03
	Genes whose promoters are bound by FOXP3 [GeneID=50943] based an a ChIP-chip analysis.	1.432060 E-20	3.243984 E-08
	Genes down-regulated in hairy cell leukemia (HCL) compared with normal and other neoplastic B cell populations.	8.759803 E-17	2.600277 E-04
	Genes up-regulated in macrophages by P.gingivalis FimA pathogen.	3.123597 E-16	6.885114 E-04
	Genes bound by EWSR1-FLT1 [GeneID=2130;2321] fusion but whose expression did not change in STA-ET-7.2 cells (Ewing's sarcoma) after knockdown of EWSR1-FLT1 by RNAi.	1.015198 E-10	4.314363 E-03
	The 'adult tissue stem' module: genes coordinately up-regulated in a compendium of adult tissue stem cells.	1.181769 E-08	2.439076 E-04
	Genes down-regulated in brain from patients with Alzheimer's disease.	2.205808 E-08	1.306188 E-14
	Genes down-regulated in NCI-H1299 cells (large cell neuroendocrine carcinoma) stably expressing SEMA3B [GeneID=7869].	1.065972 E-06	7.612913 E-04
	Genes down-regulated in glomeruli of kidneys from patients with diabetic nephropathy (type 2 diabetes mellitus).	1.905326 E-06	4.403312 E-08
	Genes down-regulated in BJAB cells (B-lymphoma) after glucose [PubChem=206] deprivation.	1.268229 E-05	3.468146 E-03
	Genes in the expression cluster 'LT-HSC Shared': up-regulated in long term hematopoietic stem cells (LT-HSC) from adult bone marrow and fetal liver.	3.925572 E-05	5.005648 E-03
	Cluster 4: genes repressed by ionizing radiation regardless of ATM [GeneID=472] status.	4.464676 E-05	1.715609 E-03
	Top 20 negative significant genes associated with liposarcomas, versus other soft-tissue tumors.	1.108500 E-04	4.132760 E-04
	Cluster 2: genes down-regulated in lung tissue samples from mice with oncogenic form of KRAS [GeneID=3845] and inactivated PTEN [GeneID=5728].	3.526525 E-04	7.861655 E-03
	Cluster 8: genes changed in primary keratinocytes by UVB irradiation.	4.127744 E-04	6.678053 E-03
	Up-regulated genes in the signature set for lymph node metastasis in head and neck squamous cell carcinoma (HNSCC).	7.422754 E-04	4.673146 E-03
	Cluster 7 of aberrantly hypermethylated genes in blasts from AML (acute myeloid leukemia) patients.	1.283706 E-03	4.310069 E-03
	Genes with high-CpG-density promoters (HCP) bearing histone H3 dimethylation at K4 (H3K4me2) and trimethylation at K27 (H3K27me3) in brain.	1.300032 E-03	5.993151 E-10
	Genes in the expression cluster 'HSC Shared': up-regulated in hematopoietic stem cells (HSC) from adult bone marrow and fetal liver.	3.403020 E-03	2.150733 E-05
	Gene regulated in the opposite directions by v-MYB (DN) and c-MYB (UP) variants of CMYB [GeneID=4602] overexpressed in primary monocyte cultures off adenoviral vectors.	4.493828 E-03	2.698764 E-04
	Genes down-regulated in the MM1S cells (multiple myeloma) after treatment with aplidin [PubChem=44152164], a marin E-derived compound with potential anti-cancer properties.	7.524145 E-03	5.588513 E-03
	Transcripts showing subcellular localization only to proximal dendrites in the adult mouse brain.	9.804197 E-03	7.389680 E-04
MSigDB Predicted Promoter Motifs
	Motif NNATTGCNNAANNN matches CEBPA: CCAAT/enhancer binding protein (C/EBP), alpha	1.218263 E-124	2.104631 E-09
	Motif NNRTGCAATMCCC matches DDIT3: DNA-damag E-inducible transcript 3&lt;br&gt; CEBPA DIFF GENES	2.200403 E-107	1.673280 E-03
	Motif YNGTTNNNATT (no known TF)	1.553465 E-85	9.890811 E-14
	Motif YAATNRNNNYNATT (no known TF)	1.220894 E-67	4.946467 E-03
	Motif TAAWWATAG matches MEF2A: MADS box transcription enhancer factor 2, polypeptide A (myocyte enhancer factor 2A)	5.180899 E-54	1.341426 E-03
	Motif NNNAACTGNC matches MYB: v-myb myeloblastosis viral oncogene homolog (avian)	1.085362 E-51	1.790600 E-03
	Motif TGACAGKTTTAYGA matches MEIS1: Meis1, myeloid ecotropic viral integration site 1 homolog (mouse)&lt;br&gt; HOXA9: homeobox A9	3.466166 E-51	2.700054 E-04
	Motif GCANCTGNY matches MYOD1: myogenic differentiation 1	9.323478 E-49	2.930258 E-04
	Motif YTAATTAA matches LHX3: LIM homeobox 3	3.010009 E-48	9.617161 E-04
	Motif TAATTA matches VSX1: visual system homeobox 1 homolog, CHX10-like (zebrafish)	1.739309 E-46	4.962670 E-10
	Motif ANKCTAWAAATAGMHNN matches MEF2A: MADS box transcription enhancer factor 2, polypeptide A (myocyte enhancer factor 2A)	1.233325 E-44	1.011836 E-06
	Motif RGCTATWTTTAR (no known TF)	1.938905 E-42	4.687641 E-08
	Motif AATTAATTAA matches LHX3: LIM homeobox 3	9.157755 E-42	7.636694 E-08
	Motif ANCAATCAW matches PBX1: pr E-B-cell leukemia transcription factor 1	2.146876 E-41	1.710559 E-05
	Motif CNNRCCCGCATD matches GCM1: glial cells missing homolog 1 (Drosophila)	4.492428 E-39	2.211765 E-05
	Motif NNNNNWKCTAWAAATAGMNNNN (no known TF)	2.965050 E-38	1.544194 E-03
	Motif YTAAYNGCT (no known TF)	9.733218 E-38	2.864649 E-06
	Motif NNNCAMAACACRNA matches FALZ: fetal Alzheimer antigen	1.170539 E-36	3.020986 E-03
	Motif CYYTGACGTCA matches ATF1: activating transcription factor 1	1.857782 E-36	1.830672 E-04
	Motif RNKCTATTTWTAGMWN matches MEF2A: MADS box transcription enhancer factor 2, polypeptide A (myocyte enhancer factor 2A)	2.417660 E-36	5.438860 E-06
	Motif YNNNTAATCYCMN matches CRX: con E-rod homeobox	4.868917 E-36	6.635816 E-06
	Motif NNNNNNNGKACNNNNTGTTCTNNNNNN matches NR3C1: nuclear receptor subfamily 3, group C, member 1 (glucocorticoid receptor)	5.045951 E-36	6.411514 E-05
	Motif CKGDYTAAAAATAACYMM (no known TF)	2.453728 E-35	1.547832 E-05
	Motif DGATADGAHWAGATA matches EVI1: ecotropic viral integration site 1	3.779993 E-35	6.115719 E-06
	Motif CAGCTG matches REPIN1: replication initiator 1	4.869211 E-35	1.988793 E-04
	Motif NNNNNNNWATGCAAATNNNWNNA matches POU2F1: POU domain, class 2, transcription factor 1	1.377732 E-34	1.393374 E-07
	Motif NAAWAATTANS matches PAX4: paired box gene 4	9.153955 E-33	2.780894 E-05
	Motif CAGTTTCWCTTTYCC matches STAT1: signal transducer and activator of transcription 1, 91kDa&lt;br&gt; STAT2: signal transducer and activator of transcription 2, 113kDa	8.324970 E-32	9.252887 E-04
	Motif NNNAACAGATGKTNNN matches TAL1: T-cell acute lymphocytic leukemia 1&lt;br&gt; TCF4: transcription factor 4	2.125905 E-31	6.695783 E-05
	Motif CBGTTTSNN matches TCF8: transcription factor 8 (represses interleukin 2 expression)	5.644847 E-31	5.846550 E-05
	Motif CWTAATTG matches NKX2-5: NK2 transcription factor related, locus 5 (Drosophila)	6.631956 E-31	5.594563 E-05
	Motif NAACNGNCN matches MYB: v-myb myeloblastosis viral oncogene homolog (avian)	7.156959 E-31	1.415056 E-06
	Motif NNNAACAGATGKTNNN matches TAL1: T-cell acute lymphocytic leukemia 1&lt;br&gt; TCF3: transcription factor 3 (E2A immunoglobulin enhancer binding factors E12/E47)	1.250483 E-30	5.540724 E-05
	Motif NNNTKNNGNAAN matches CEBPA: CCAAT/enhancer binding protein (C/EBP), alpha	2.183914 E-29	1.773904 E-06
	Motif NNATTRCNNAANNN matches CEBPA: CCAAT/enhancer binding protein (C/EBP), alpha	2.850569 E-29	6.692160 E-09
	Motif BNCRSTTTCANTTYY matches IRF1: interferon regulatory factor 1	1.256341 E-28	5.377854 E-03
	Motif NNNAACAGATGKTNNN matches TAL1: T-cell acute lymphocytic leukemia 1&lt;br&gt; TCF3: transcription factor 3 (E2A immunoglobulin enhancer binding factors E12/E47)	3.329483 E-27	3.629920 E-04
	Motif ATTAAYTRCAC matches ZHX2: zinc fingers and homeoboxes 2	5.732094 E-26	1.265655 E-06
	Motif WNNANYYAATTANCNN matches PRRX2: paired related homeobox 2	8.053894 E-26	2.639043 E-09
	Motif CAGGTG matches TCF3: transcription factor 3 (E2A immunoglobulin enhancer binding factors E12/E47)	2.716504 E-25	7.423474 E-10
	Motif NNKGAATTAVAVTDN matches POU3F1: POU domain, class 3, transcription factor 1	3.275809 E-25	3.453738 E-06
	Motif NMTTCATAAWTATWNMNA matches POU1F1: POU domain, class 1, transcription factor 1 (Pit1, growth hormone factor 1)	2.882323 E-22	1.673713 E-03
	Motif AACTTT (no known TF)	1.033523 E-21	2.104508 E-32
	Motif GGGTGGRR matches PAX4: paired box gene 4	4.299144 E-18	3.753788 E-04
	Motif WTGAAAT (no known TF)	2.029675 E-17	7.649310 E-07
	Motif GGATTA matches PITX2: paired-like homeodomain transcription factor 2	8.864698 E-16	5.924669 E-04
	Motif YTATTTTNR matches MEF2A: MADS box transcription enhancer factor 2, polypeptide A (myocyte enhancer factor 2A)	1.728622 E-12	2.500060 E-10
	Motif RYTTCCTG matches ETS2: v-ets erythroblastosis virus E26 oncogene homolog 2 (avian)	6.476114 E-12	1.602868 E-03
	Motif CAGTGGG matches KLF12: Kruppel-like factor 12	7.650380 E-11	7.037607 E-06
	Motif YCATTAA (no known TF)	1.972264 E-09	9.947592 E-06
	Motif TGCTGAGTCAY matches NFE2: nuclear factor (erythroid-derived 2), 45kDa	5.554251 E-09	5.120146 E-04
	Motif CTTTAAR (no known TF)	1.153696 E-08	4.257592 E-06
	Motif TGCCAAR matches NF1: neurofibromin 1 (neurofibromatosis, von Recklinghausen disease, Watson disease)	2.271788 E-08	2.316484 E-03
	Motif TTANTCA (no known TF)	8.738085 E-08	2.431586 E-10
	Motif RNRTKDNGMAAKNN matches CEBPB: CCAAT/enhancer binding protein (C/EBP), beta	9.084625 E-08	6.418501 E-04
	Motif RTTTNNNYTGGM (no known TF)	1.139078 E-05	3.638153 E-03
	Motif CCCNNNNNNAAGWT (no known TF)	1.693898 E-04	4.020491 E-03
	Motif CTTTGT matches LEF1: lymphoid enhancer-binding factor 1	1.961290 E-04	1.094025 E-15
	Motif GGGAGGRR matches MAZ: MYC-associated zinc finger protein (purin E-binding transcription factor)	1.203359 E-03	5.496675 E-09
	Motif CAGNYGKNAAA (no known TF)	6.203577 E-03	1.868430 E-03
	Motif NVTNWTGATTGACNACAAVARRBN matches MYOG: myogenin (myogenic factor 4)	6.687256 E-03	1.084914 E-06
MSigDB miRNA Motifs
	Targets of MicroRNA GTAAGAT,MIR-200A	6.531335 E-75	2.559098 E-08
	Targets of MicroRNA TACAATC,MIR-508	2.622744 E-65	5.079359 E-03
	Targets of MicroRNA GGCAGTG,MIR-324-3P	1.138535 E-64	8.848006 E-03
	Targets of MicroRNA CCCAGAG,MIR-326	4.285509 E-55	4.990842 E-03
	Targets of MicroRNA TCATCTC,MIR-143	5.029544 E-48	6.280502 E-08
	Targets of MicroRNA CCTGCTG,MIR-214	5.692463 E-43	4.826593 E-03
	Targets of MicroRNA GCATTTG,MIR-105	2.082478 E-41	3.036731 E-09
	Targets of MicroRNA CACTGCC,MIR-34A,MIR-34C,MIR-449	4.474328 E-31	9.330106 E-05
	Targets of MicroRNA CTTTGCA,MIR-527	1.486894 E-29	1.830672 E-04
	Targets of MicroRNA ACTGCCT,MIR-34B	4.524522 E-28	4.004569 E-03
	Targets of MicroRNA TGCTGCT,MIR-15A,MIR-16,MIR-15B,MIR-195,MIR-424,MIR-497	3.801021 E-25	1.558639 E-06
	Targets of MicroRNA TAGCTTT,MIR-9	5.500988 E-23	8.828340 E-07
	Targets of MicroRNA AATGTGA,MIR-23A,MIR-23B	3.414417 E-17	2.368643 E-08
	Targets of MicroRNA TGCCTTA,MIR-124A	7.204531 E-14	3.779562 E-05
	Targets of MicroRNA GGGATGC,MIR-324-5P	2.955125 E-05	2.147808 E-03
	Targets of MicroRNA TAGGTCA,MIR-192,MIR-215	6.361566 E-04	5.645981 E-08
	Targets of MicroRNA GGTAACC,MIR-409-5P	9.680118 E-04	1.500773 E-04
	Targets of MicroRNA CACTTTG,MIR-520G,MIR-520H	3.349392 E-03	3.410310 E-07
	Targets of MicroRNA ATTACAT,MIR-380-3P	4.941383 E-03	3.484401 E-06
	Targets of MicroRNA CTGAGCC,MIR-24	6.024181 E-03	1.339519 E-03
	Targets of MicroRNA GGCAGCT,MIR-22	9.381220 E-03	1.802867 E-03
InterPro
	Neuroblastoma breakpoint family (NBPF) domain	2.896897 E-276	4.435217 E-03
	Doublesex- and mab-3-related transcription factor C1	4.748675 E-47	7.103554 E-03
	Chemokin E-like protein, FAM19A2	2.049068 E-04	5.251968 E-03
	Zinc finger, Rad18-type putative	4.384577 E-04	5.251968 E-03
	Zinc finger, GATA-type	1.641594 E-03	6.196213 E-03
	Syndecan	1.907837 E-03	5.033897 E-05
	Calcyon neuron-specific vesicular protein	2.867275 E-03	5.981650 E-04
	FCH domain	3.889069 E-03	3.691686 E-03
	Amidohydrolase 1	7.735073 E-03	2.670314 E-03
TreeFam
	FAM19A1, FAM19A2, FAM19A3, FAM19A4, FAM19A5	0.0002049068	5.251968 E-03
	SDC1, SDC2, SDC3, SDC4	0.0019078370	5.033897 E-05
	GLB1L2, GLB1L3	0.0022653310	7.103554 E-03
	CALY, ENSG00000168824, ENSG00000170091	0.0028672750	5.981650 E-04
	Androgen-induced proliferation inhibitor/SCC-112 protein	0.0093166690	7.103554 E-03

## Sheet: HeartGO
Ontology	Name	Binom_Raw_PValue	Hyper_Raw_PValue
GO Molecular Function
	2,3-bisphosphoglycerat E-dependent phosphoglycerate mutase activity	1.657756 E-06	0.0087024000
	NADH dehydrogenase (ubiquinone) activity	2.070265 E-04	0.0007358446
	creatine kinase activity	5.798206 E-04	0.0007396860
	oxidoreductase activity, acting on NAD(P)H, quinone or similar compound as acceptor	8.757015 E-04	0.0019594790
	structural constituent of ribosome	1.307631 E-03	0.0004884903
	thiosulfate transmembrane transporter activity	1.919204 E-03	0.0087024000
	chlorid E-transporting ATPase activity	2.020342 E-03	0.0087024000
	DNA topoisomerase binding	2.081599 E-03	0.0087024000
	C4-dicarboxylate transmembrane transporter activity	2.641054 E-03	0.0015356380
	C5L2 anaphylatoxin chemotactic receptor binding	3.010601 E-03	0.0087024000
	tau-protein kinase activity	4.048651 E-03	0.0046902760
	macrophage migration inhibitory factor binding	4.581834 E-03	0.0087024000
	1-pyrrolin E-5-carboxylate dehydrogenase activity	4.632778 E-03	0.0087024000
	acireductone synthase activity	6.897941 E-03	0.0087024000
	homogentisate 1,2-dioxygenase activity	7.139633 E-03	0.0087024000
	histone acetyltransferase regulator activity	7.437488 E-03	0.0087024000
	acireductone dioxygenase [iron(II)-requiring] activity	8.135578 E-03	0.0087024000
	kringle domain binding	8.345548 E-03	0.0087024000
	ATPase binding	8.818100 E-03	0.0020009490
GO Biological Process
	mitochondrial transport	3.545182 E-29	5.788508 E-03
	generation of precursor metabolites and energy	6.351122 E-27	2.098370 E-07
	energy derivation by oxidation of organic compounds	6.973879 E-25	2.748506 E-06
	energy reserve metabolic process	1.009895 E-22	8.800029 E-03
	oxidation-reduction process	8.593720 E-16	1.661028 E-05
	carboxylic acid metabolic process	5.052068 E-15	1.798205 E-03
	oxoacid metabolic process	1.411104 E-12	1.069212 E-03
	organic acid metabolic process	2.219308 E-12	1.298443 E-03
	cellular metabolic process	1.923166 E-10	5.471184 E-03
	negative regulation of biological process	4.046828 E-10	5.691992 E-04
	small molecule metabolic process	5.815136 E-10	3.799043 E-05
	negative regulation of cellular process	4.741210 E-09	6.835550 E-03
	singl E-organism metabolic process	6.978109 E-09	7.864659 E-06
	cellular response to endogenous stimulus	1.854886 E-08	8.786615 E-03
	response to endogenous stimulus	1.843555 E-07	4.846085 E-03
	cellular response to organic substance	9.268746 E-07	5.352637 E-03
	cellular localization	1.000696 E-06	8.061491 E-03
	cellular process	1.555405 E-06	2.187325 E-04
	response to organic substance	4.808600 E-06	3.020446 E-03
	respiratory electron transport chain	9.682636 E-05	5.900917 E-05
	electron transport chain	1.131418 E-04	6.598148 E-05
	gluconeogenesis	1.145886 E-04	5.714792 E-04
	muscle contraction	1.557426 E-04	1.113114 E-05
	release of sequestered calcium ion into cytosol by sarcoplasmic reticulum	1.641596 E-04	1.103186 E-03
	hexose biosynthetic process	1.778938 E-04	7.973504 E-04
	monosaccharide biosynthetic process	2.280345 E-04	1.160228 E-03
	mitochondrial electron transport, NADH to ubiquinone	2.322717 E-04	6.230191 E-04
	muscle system process	2.932183 E-04	9.024784 E-06
	cellular respiration	2.963508 E-04	7.347612 E-05
	sulfur amino acid metabolic process	4.719171 E-04	3.071428 E-05
	striated muscle contraction	4.734473 E-04	3.138221 E-04
	mitochondrial ATP synthesis coupled electron transport	7.295133 E-04	1.843321 E-03
	ATP synthesis coupled electron transport	7.295192 E-04	1.959479 E-03
	endoplasmic reticulum membrane organization	8.098641 E-04	8.702400 E-03
	positive regulation of cell communication by electrical coupling involved in cardiac conduction	8.098641 E-04	8.702400 E-03
	ribosomal small subunit biogenesis	1.037174 E-03	8.817538 E-04
	oxidative phosphorylation	1.114319 E-03	3.411808 E-03
	sarcoplasmic reticulum calcium ion transport	1.156012 E-03	3.234654 E-03
	negative regulation of UDP-glucose catabolic process	1.479093 E-03	8.702400 E-03
	L-methionine salvage from methylthioadenosine	1.660820 E-03	1.103186 E-03
	thiosulfate transport	1.919204 E-03	8.702400 E-03
	malate transmembrane transport	1.919204 E-03	8.702400 E-03
	positive regulation of ryanodin E-sensitive calcium-release channel activity	2.549083 E-03	3.234654 E-03
	viral transcription	2.594692 E-03	6.475042 E-03
	cellular protein complex disassembly	2.636627 E-03	2.541433 E-03
	heart process	2.767489 E-03	1.003565 E-03
	establishment of protein localization to endoplasmic reticulum	2.844139 E-03	2.975123 E-03
	glucose metabolic process	3.025466 E-03	2.455758 E-03
	translational termination	3.243884 E-03	7.602691 E-03
	regulation of calcium ion transmembrane transporter activity	3.286813 E-03	3.581367 E-04
	viral gene expression	3.657492 E-03	9.524912 E-03
	negative regulation of calcium ion transmembrane transporter activity	3.751031 E-03	9.393369 E-03
	cellular amino acid metabolic process	3.882998 E-03	2.654070 E-04
	mitochondrial tRNA methylation	3.961514 E-03	8.702400 E-03
	ribosomal small subunit assembly	4.081843 E-03	2.602560 E-03
	regulation of ryanodin E-sensitive calcium-release channel activity	4.085010 E-03	1.144196 E-03
	negative regulation of calcium-dependent cell-cell adhesion	4.250509 E-03	8.702400 E-03
	phosphocreatine biosynthetic process	4.251322 E-03	8.702400 E-03
	macrophage migration inhibitory factor signaling pathway	4.581834 E-03	8.702400 E-03
	regulation of calcium-transporting ATPase activity	4.591675 E-03	2.244675 E-04
	creatine metabolic process	4.638297 E-03	3.930943 E-03
	regulation of lateral pseudopodium assembly	4.718711 E-03	8.702400 E-03
	positive regulation of protein processing	5.097153 E-03	5.511518 E-03
	positive regulation of cytokin E-mediated signaling pathway	5.490619 E-03	1.007572 E-03
	protein complex disassembly	5.565289 E-03	5.083182 E-03
	positive regulation of response to cytokine stimulus	5.580990 E-03	1.144196 E-03
	protein localization to endoplasmic reticulum	5.590632 E-03	4.754428 E-03
	negative regulation of N-terminal protein palmitoylation	5.947936 E-03	8.702400 E-03
	regulation of release of sequestered calcium ion into cytosol by sarcoplasmic reticulum	6.502881 E-03	1.144196 E-03
	mesenchymal cell apoptotic process	6.608493 E-03	8.702400 E-03
	regulation of cation channel activity	6.665470 E-03	7.973504 E-04
	macromolecular complex disassembly	6.716700 E-03	6.165867 E-03
	sulfur amino acid catabolic process	7.502424 E-03	4.690276 E-03
	cellular modified amino acid metabolic process	7.685454 E-03	1.348325 E-03
	carbohydrate biosynthetic process	8.305655 E-03	3.459919 E-03
	regulation of cytokin E-mediated signaling pathway	8.349168 E-03	7.309521 E-03
	heart contraction	8.469200 E-03	8.397445 E-03
	regulation of humoral immune response	9.554997 E-03	7.021158 E-03
	C4-dicarboxylate transport	9.735461 E-03	3.234654 E-03
	hexose metabolic process	9.957260 E-03	7.256866 E-03
GO Cellular Component
	cytoplasm	9.481940 E-15	2.066148 E-06
	mitochondrion	5.009835 E-11	5.311767 E-03
	organelle part	6.025636 E-11	8.847703 E-04
	intracellular organelle part	1.634076 E-10	4.087273 E-03
	cytoplasmic part	2.129220 E-10	2.747689 E-04
	intracellular part	5.417592 E-09	1.230267 E-04
	intracellular	1.102213 E-08	3.135903 E-04
	macromolecular complex	2.911951 E-06	1.758805 E-04
	respiratory chain	2.241455 E-05	8.011616 E-05
	cell part	5.253566 E-05	9.482762 E-03
	cell	5.397579 E-05	9.526536 E-03
	mitochondrial respiratory chain	1.989861 E-04	3.838547 E-04
	mitochondrial respiratory chain complex I	2.027775 E-04	6.777709 E-04
	cytosolic small ribosomal subunit	3.553268 E-04	3.581367 E-04
	sarcoplasmic reticulum	4.741730 E-04	1.146812 E-04
	mitochondrial inner membrane	8.199525 E-04	4.417001 E-04
	sarcoplasm	8.764458 E-04	1.880682 E-04
	oxidoreductase complex	9.850847 E-04	8.772469 E-04
	small ribosomal subunit	1.392980 E-03	2.206809 E-03
	gamma-tubulin complex	1.699720 E-03	3.331592 E-04
	sarcomere	1.935594 E-03	1.364772 E-05
	junctional sarcoplasmic reticulum membrane	2.190219 E-03	3.234654 E-03
	organelle inner membrane	2.412499 E-03	9.053978 E-04
	contractile fiber part	3.077656 E-03	2.737595 E-05
	ribosomal subunit	3.634183 E-03	6.971923 E-03
	myofibril	3.661445 E-03	4.193821 E-05
	sarcoplasmic reticulum membrane	3.699009 E-03	3.174423 E-03
	Z disc	4.175394 E-03	2.356644 E-05
	SMAD3-SMAD4 protein complex	4.178509 E-03	8.702400 E-03
	macrophage migration inhibitory factor receptor complex	4.581834 E-03	8.702400 E-03
	NOS2-CD74 complex	4.581834 E-03	8.702400 E-03
	contractile fiber	5.050712 E-03	6.257795 E-05
	I band	5.614917 E-03	5.900917 E-05
	cytosolic ribosome	7.071104 E-03	9.873193 E-03
	mitochondrial membrane	8.396828 E-03	7.691738 E-04
Mouse Phenotype
	abnormal glycogen catabolism	8.255944 E-47	4.690276 E-03
	muscle fatigue	2.513507 E-41	4.019731 E-04
	abnormal muscle cell glucose uptake	5.052974 E-31	1.880682 E-04
	abnormal glycogen level	9.425246 E-27	4.419907 E-04
	abnormal glycogen homeostasis	6.905026 E-26	7.900877 E-04
	increased total body fat amount	7.573087 E-24	9.873193 E-03
	insulin resistance	1.244721 E-22	5.788508 E-03
	abnormal enzyme/coenzyme activity	2.847480 E-21	7.613407 E-03
	decreased circulating glucose level	6.932261 E-18	8.916072 E-04
	abnormal muscle fiber morphology	7.233187 E-16	4.332092 E-03
	abnormal adipose tissue amount	3.475575 E-12	6.298481 E-03
	abnormal muscle physiology	5.115830 E-11	2.899676 E-04
	abnormal adipose tissue morphology	2.492543 E-10	3.622105 E-03
	adipose tissue phenotype	3.507537 E-10	4.130806 E-03
	abnormal glucose homeostasis	9.063437 E-10	2.325830 E-03
	abnormal liver morphology	1.224039 E-09	8.980705 E-03
	abnormal muscle morphology	3.755937 E-09	2.414026 E-03
	muscle phenotype	2.336105 E-06	4.388123 E-03
	cardiac hypertrophy	4.834164 E-05	3.307000 E-08
	abnormal aerobic respiration	1.343373 E-04	1.268105 E-04
	decreased urine albumin level	2.366655 E-04	7.525357 E-05
	abnormal body weight	8.726104 E-04	9.998185 E-03
	abnormal microglial cell activation	1.135640 E-03	9.393369 E-03
	increased heart left ventricle size	1.266414 E-03	1.794992 E-05
	abnormal motor capabilities/coordination/movement	1.285945 E-03	9.917936 E-03
	abnormal cardiac stroke volume	1.498050 E-03	4.792959 E-04
	abnormal cellular respiration	1.566553 E-03	4.857469 E-04
	increased cardiac stroke volume	1.620971 E-03	1.535638 E-03
	increased carbon dioxide production	2.308924 E-03	4.350369 E-04
	enlarged myocardial fiber	2.443007 E-03	1.250473 E-04
	degranulated pancreatic beta cells	2.621566 E-03	7.396860 E-04
	abnormal coronary circulation	3.213709 E-03	2.193409 E-04
	heart left ventricle hypertrophy	3.371151 E-03	1.604914 E-04
	polyphagia	3.617258 E-03	1.738628 E-04
	abnormal heart left ventricle size	3.834069 E-03	3.055822 E-05
	abnormal cardiac muscle contractility	5.735021 E-03	7.407985 E-06
	thin malleus neck	6.608493 E-03	8.702400 E-03
	abnormal coronary flow rate	8.746509 E-03	2.602560 E-03
	abnormal heart shape	9.468706 E-03	1.641607 E-04
Human Phenotype
	Exercis E-induced muscle cramps	3.536968 E-05	2.602560 E-03
	Exercis E-induced myalgia	1.276066 E-04	2.035828 E-03
	Lipodystrophy	1.837318 E-04	9.928272 E-06
	Myopathy	2.635228 E-04	1.569284 E-04
	Myoglobinuria	3.762400 E-04	8.335558 E-03
	Rhabdomyolysis	4.864322 E-04	8.335558 E-03
	Cardiomyopathy	8.420197 E-04	5.610128 E-05
	Abnormality of the myocardium	9.212208 E-04	6.647338 E-05
	Myalgia	1.161244 E-03	1.160228 E-03
	Abnormality of adipose tissue	1.424029 E-03	1.187935 E-04
	Coronary artery disease	2.167833 E-03	4.775971 E-04
	Abnormality of the coronary arteries	2.177308 E-03	5.230417 E-04
	Membranoproliferative glomerulonephritis	3.010601 E-03	8.702400 E-03
	refractory macrocytic anemia	4.346026 E-03	8.702400 E-03
	Nasal, dysarthic speech	6.363934 E-03	8.702400 E-03
	Unilateral primary pulmonary dysgenesis	6.608493 E-03	8.702400 E-03
	Parathyroid agenesis	6.608493 E-03	8.702400 E-03
	Femoral hernia	6.608493 E-03	8.702400 E-03
	Lipoatrophy	6.638961 E-03	1.079904 E-03
	Atherosclerosis	6.860695 E-03	1.959479 E-03
	Aortic valve calcification	7.139633 E-03	8.702400 E-03
	Thickened Achilles tendon	7.139633 E-03	8.702400 E-03
	Intervertebral disk calcification	7.139633 E-03	8.702400 E-03
	Pigmentation of the sclera	7.139633 E-03	8.702400 E-03
	Arteriosclerosis	7.216689 E-03	2.206809 E-03
	Hypertrophic cardiomyopathy	8.041000 E-03	1.348325 E-03
Disease Ontology
	sarcomatoid renal cell carcinoma	0.0003780234	0.0087024
	C3 deficiency	0.0030106010	0.0087024
	alkaptonuria	0.0071396330	0.0087024
MSigDB Immunologic Signatures
	Genes down-regulated in comparison of unstimulated peripheral blood mononuclear cells (PBMC) 1 day after stimulation with YF17D vaccine versus PBMC 21 days after the stimulation.	6.227750 E-24	0.0017094310
	Genes up-regulated in comparison of unstimulated peripheral blood mononuclear cells (PBMC) versus PBMC 1 day after stimulation with YF17D vaccine.	1.700135 E-23	0.0049566440
	Genes up-regulated in comparison of dendritic cells (DC) stimulated with CpG DNA (TLR9 agonist) at 0.5 h versus those stimulated with CpG DNA (TLR9 agonist) at 12 h.	7.385284 E-22	0.0079824340
	Genes up-regulated in comparison of eosinophils versus neutrophils.	6.142102 E-20	0.0076134070
	Genes down-regulated in comparison of macrophages exposed to 5 worms/well B. malayi versus macrophages exposed to M. tuberculosis.	1.258969 E-03	0.0000578783
	Genes down-regulated in comparison of SP1 thymocytes versus SP3 thymocytes.	3.364613 E-03	0.0012294990
	Genes up-regulated in comparison of dendritic cells (DC) stimulated with Gardiquimod (TLR7 agonist) at 0.5 h versus those stimulated with Gardiquimod (TLR7 agonist) at 12 h.	3.695022 E-03	0.0003462152
	Genes down-regulated in comparison of Th1 cells versus induced regulatory T cell (Treg).	5.968073 E-03	0.0069125730
	Genes up-regulated in comparison of lung tissue from wild type mice subjected to ozone for 0 h versus that from TLR4 [GeneID=7099] deficient mice subjected to ozone for 6 h.	6.677408 E-03	0.0069125730
MSigDB Cancer Neighborhood
	Neighborhood of HAT1	1.658582 E-32	9.396803 E-03
	Neighborhood of MYL2	8.396991 E-08	7.799045 E-06
	Neighborhood of MYL3	3.499103 E-07	6.626792 E-06
	Neighborhood of TTN	6.419661 E-07	2.161329 E-06
	Neighborhood of NPM1	3.627225 E-04	6.315291 E-04
	Neighborhood of ACTG1	7.803844 E-04	1.640330 E-03
	Neighborhood of LCAT	7.840262 E-04	4.441083 E-03
	Neighborhood of NME2	8.618904 E-04	2.616859 E-03
	Neighborhood of HPN	1.343326 E-03	5.975088 E-03
BioCyc Pathway
	creatin E-phosphate biosynthesis	0.0004408834	0.0004463651
	<i>S</i>-methyl-5-thio-&alpha;-D-ribose 1-phosphate degradation I	0.0005206913	0.0004463651
	methylthiopropionate biosynthesis	0.0081355780	0.0087024000
MSigDB Pathway
	Reversal of Insulin Resistance by Leptin	5.610184 E-52	3.930943 E-03
	Insulin signaling pathway	1.841631 E-26	1.319708 E-03
	Genes involved in Gluconeogenesis	1.037451 E-05	1.446155 E-04
	Genes involved in Glucose metabolism	1.085523 E-04	2.360351 E-04
	Genes involved in Sulfur amino acid metabolism	3.026305 E-04	5.120836 E-05
	Genes involved in Respiratory electron transport	4.544208 E-04	4.948559 E-04
	Genes involved in Respiratory electron transport, ATP synthesis by chemiosmotic coupling, and heat production by uncoupling proteins.	8.099594 E-04	1.314774 E-03
	Genes involved in Formation of the ternary complex, and subsequently, the 43S complex	1.169118 E-03	8.623987 E-04
	Genes involved in The citric acid (TCA) cycle and respiratory electron transport	1.322087 E-03	9.312858 E-04
	Genes involved in SRP-dependent cotranslational protein targeting to membrane	1.605781 E-03	2.752093 E-03
	Genes involved in Activation of the mRNA upon binding of the cap-binding complex and eIFs, and subsequent binding to 43S	1.788145 E-03	1.523579 E-03
	Genes involved in Peptide chain elongation	2.831552 E-03	6.745779 E-03
	Genes involved in Metabolism of amino acids and derivatives	2.970415 E-03	3.462152 E-04
	Oxidative phosphorylation	4.004610 E-03	5.253462 E-03
	Genes involved in Translation	5.650068 E-03	9.304219 E-03
	Parkinson's disease	5.874221 E-03	4.754428 E-03
	Cysteine and methionine metabolism	6.910775 E-03	3.174423 E-03
	Genes involved in Metabolism of polyamines	7.489322 E-03	7.335258 E-03
MGI Expression: Detected
	TS24_skeletal muscle	7.715249 E-05	3.493963 E-06
	TS23_hindbrain pia mater	3.061027 E-04	8.702400 E-03
	TS23_diencephalon pia mater	3.061027 E-04	8.702400 E-03
	TS25_brain meninges	3.061027 E-04	8.702400 E-03
	TS24_integumental system muscle	3.061027 E-04	8.702400 E-03
	TS23_pericardial cavity parietal mesothelium	1.377392 E-03	8.702400 E-03
	TS23_intercostal skeletal muscle external layer	1.377392 E-03	8.702400 E-03
	TS23_intercostal skeletal muscle internal layer	1.377392 E-03	8.702400 E-03
	TS24_cardiovascular system	1.663823 E-03	1.933379 E-07
	TS23_heart	1.738873 E-03	2.399478 E-07
	TS23_diaphragm	2.054148 E-03	6.049844 E-06
	TS24_heart	3.115794 E-03	1.016194 E-06
	TS23_cardiovascular system	3.394541 E-03	3.797256 E-08
	TS25_intestine muscularis	3.594540 E-03	1.103186 E-03
	TS24_intestine muscularis	4.472890 E-03	4.463651 E-04
	TS22_mesonephric mesenchyme of male	5.924299 E-03	8.702400 E-03
	TS22_epithelium of rest of nephric duct of male	5.924299 E-03	8.702400 E-03
	TS16_heart	6.089096 E-03	2.060070 E-05
	TS18_intestine epithelium	6.363934 E-03	8.702400 E-03
	TS23_intraembryonic coelom	6.551487 E-03	2.034921 E-05
	TS16_cardiovascular system	6.606541 E-03	2.148713 E-05
	TS17_1st branchial arch mesenchyme derived from head mesoderm	6.608493 E-03	8.702400 E-03
	TS17_2nd branchial arch mesenchyme derived from head mesoderm	6.608493 E-03	8.702400 E-03
	TS17_3rd branchial arch mesenchyme derived from head mesoderm	6.608493 E-03	8.702400 E-03
	TS13_primary head vein	6.893279 E-03	8.702400 E-03
	TS28_megakaryocyte	6.976274 E-03	7.335258 E-03
	TS23_forearm rest of mesenchyme	9.496347 E-03	5.260281 E-04
MSigDB Perturbation
	Down-regulated genes in A2780 cells (ovarian cancer) treated with 17AAG [PubChem=6440175], a chemical with anticancer properties.	4.740960 E-30	9.184730 E-03
	Selected genes up-regulated in peripheral blood monocytes (PBMC) of patients with hepatocellular carcinoma (HCC) compared to those with chronic hepatitis.	3.114690 E-27	5.955416 E-03
	Marker genes down-regulated in the 'unannotated' subclass of hepatocellular carcinoma (HCC) samples.	8.347939 E-23	1.348325 E-03
	Genes up-regulated in MEF cells (embryonic fibroblast) with double knockout of the translation repressors 4EBP1 [GeneID=1978] and 4EBP2 [GeneID=1979].	1.074809 E-15	4.029068 E-03
	Genes whose expression positively correlated with that of SMARCA2 [GeneID=6595] in prostate cancer samples.	1.429925 E-12	9.823853 E-03
	Genes up-regulated in kidney biopsies from patients with well functioning kidneys more than 1-year post transplant compared to the biopsies from normal living kidney donors.	6.682259 E-12	8.449629 E-03
	Cluster f: genes identifying an intrinsic group in head and neck squamous cell carcinoma (HNSCC).	2.640531 E-07	7.263571 E-10
	Genes down-regulated in reverted NIH3T3 cells (fibroblasts transformed by activated KRAS [GeneID=3845] which then reverted to normal cells upon stable over-expression of a dominant negative form of CDC25 [GeneID=5923]) vs normal fibroblasts.	5.943471 E-04	4.527821 E-04
	Genes up-regulated in C2AS12 cells (myoblast) by IGF1 [GeneID=3479] vs PDGFB [GeneID=5155].	6.675773 E-04	7.451076 E-04
	Genes down-regulated in naive T lymphocytes lacking FURIN [GeneID=5045]: Cr E-Lox knockout of FURIN in CD4+ [GeneID=920] cells.	1.203917 E-03	5.511518 E-03
	Genes involved in oxidative phosphorylation; based on literature and sequence annotation resources and converted to Affymetrix HG-U133A probe sets.	1.499701 E-03	9.745458 E-04
	Mitochondrial genes	2.145630 E-03	5.622643 E-04
	Genes up-regulated in hepatocellular carcinoma (HCC) induced by overexpression of E2F1 [GeneID=1869].	2.281516 E-03	1.959479 E-03
	Genes up-regulated in the ventricles of healthy hearts, compared to atria.	2.842196 E-03	3.103585 E-06
	Up-regulated genes in the expression signature of direct and paracrine viral GPCR signaling in endothelial cells.	3.351082 E-03	5.706354 E-03
	Genes up-regulated in liver samples of liver-specific knockout of HNF4A [GeneID=3172].	3.680654 E-03	6.183947 E-03
	Genes up-regulated by 3 h of euglycemic hyperinsulinemic clamp in the vastus lateralis muscle of healthy lean subjects.	4.810781 E-03	1.015007 E-04
	Genes down-regulated in mouse stroma of pancreatic adenocarcinoma zenografts after treatment with HhAntag, a hedgehog (Hh) pathway inhibitor.	5.779409 E-03	1.225262 E-05
	Mitochondrial genes; based on literature and sequence annotation resources and converted to Affymetrix HG-U133A probe sets.	5.809969 E-03	1.380598 E-03
	Genes up-regulated in gastrointestinal stromal tumors (GIST) with PDGFRA [GeneID=5156] mutations.	6.157841 E-03	8.888861 E-03
	Genes down-regulated in E14 ES (embryonic stem) cells upon knockdown of CYCT1 [GeneID=904] by RNAi.	6.900100 E-03	7.922439 E-03
	Genes up-regulated in Caco-2 cells (intestinal epithelium) after coculture with the probiotic bacteria L. casei for 24h.	7.394373 E-03	3.096085 E-04
	Genes up-regulated in type 1 (soleus) vs type 2B (EDL) myofibers.	8.165869 E-03	3.739914 E-03
	Genes that comprise the mitochondria gene module	9.428843 E-03	3.096471 E-03
	Genes up-regulated in IMR90 cells (fibroblast) grown under low serum conditions and after knockdown of RB1 [GeneID=5925] by RNAi.	9.507617 E-03	1.979591 E-03
	Genes up-regulated in differentiating C2C12 cells (myoblasts) upon expression of PPARGC1A [GeneID=10891] off an adenoviral vector.	9.989566 E-03	3.848846 E-03
MSigDB Predicted Promoter Motifs
	Motif CCAWATAWGGMNMNG matches SRF: serum response factor (c-fos serum response element-binding transcription factor)	1.452868 E-19	0.002585287
	Motif DCCWTATATGGNCWN matches SRF: serum response factor (c-fos serum response element-binding transcription factor)	2.726984 E-19	0.009166790
	Motif GNCCAWATAWGGMN matches SRF: serum response factor (c-fos serum response element-binding transcription factor)	6.634846 E-18	0.006209016
InterPro
	Histone acetyltransferase type B, catalytic subunit	2.726619 E-76	0.0087024000
	Histone acetyl transferase HAT1 N-terminal	2.726619 E-76	0.0087024000
	Neuroblastoma breakpoint family (NBPF) domain	1.446263 E-67	0.0063935480
	Alpha tubulin	1.380978 E-04	0.0026025600
	Protein S100-A1	3.780234 E-04	0.0087024000
	ATP:guanido phosphotransferase, N-terminal	5.798206 E-04	0.0007396860
	ATP:guanido phosphotransferase, catalytic domain	5.798206 E-04	0.0007396860
	ATP:guanido phosphotransferase active site	5.798206 E-04	0.0007396860
	Triadin	8.098641 E-04	0.0087024000
	Putative S-adenosyl-L-methionin E-dependent methyltransferase MidA	1.994014 E-03	0.0087024000
	Uncharacterised protein family UPF0197	2.240659 E-03	0.0087024000
	Glutamine synthetase/guanido kinase, catalytic domain	2.300671 E-03	0.0015356380
	Hepatitis B X-interacting protein	2.553969 E-03	0.0087024000
	Ribosomal protein L7/L12, oligomerisation	2.705525 E-03	0.0002244675
	Ribosomal protein L7/L12, C-terminal	2.705525 E-03	0.0002244675
	DNA polymerase eta	2.720536 E-03	0.0087024000
	Ashwin	3.355202 E-03	0.0087024000
	Cell division protein Cdc123	3.375595 E-03	0.0087024000
	Oxoglutarate/iron-dependent oxygenase, C-terminal degradation domain	3.707463 E-03	0.0087024000
	NADH dehydrogenase 1, beta subcomplex, subunit 6	3.927156 E-03	0.0087024000
	SKI-interacting protein SKIP, SNW domain	4.178509 E-03	0.0087024000
	SKI-interacting protein, SKIP	4.178509 E-03	0.0087024000
	MHC class II-associated invariant chain, trimerisation	4.581834 E-03	0.0087024000
	MHC class II-associated invariant chain/CLIP, MHC II-interacting	4.581834 E-03	0.0087024000
	MHC class II-associated invariant chain	4.581834 E-03	0.0087024000
	1-pyrrolin E-5-carboxylate dehydrogenase	4.632778 E-03	0.0087024000
	Myoglobin	5.167099 E-03	0.0087024000
	Bardet-Biedl syndrome 2 protein	5.276031 E-03	0.0087024000
	Myelin gene regulatory factor	5.404490 E-03	0.0087024000
	Enolas E-phosphatase E1, eukaryotes	6.897941 E-03	0.0087024000
	Homogentisate 1,2-dioxygenase	7.139633 E-03	0.0087024000
	1,2-dihydroxy-3-keto-5-methylthiopentene dioxygenase, eukaryotes	8.135578 E-03	0.0087024000
	RmlC-like cupin domain	8.235179 E-03	0.0026025600
	Ribosomal protein S6, eukaryotic	8.769705 E-03	0.0087024000
	Ribosomal protein S6e, conserved site	8.769705 E-03	0.0087024000
TreeFam
	HAT1	2.726619 E-76	8.702400 E-03
	METAP1D	3.470937 E-75	8.702400 E-03
	NBPF11, NBPF12, NBPF14, NBPF15, NBPF16, ...	5.885724 E-70	4.690276 E-03
	SARM1	1.918431 E-06	8.702400 E-03
	CHTOP	3.061027 E-04	8.702400 E-03
	CKB, CKM, CKMT1A, CKMT1B, CKMT2	5.798206 E-04	7.396860 E-04
	TRDN	8.098641 E-04	8.702400 E-03
	OARD1	1.187567 E-03	8.702400 E-03
	RPS16	1.395277 E-03	8.702400 E-03
	STX5	1.504466 E-03	8.702400 E-03
	METTL5	1.511038 E-03	8.702400 E-03
	TP53TG5	1.986936 E-03	8.702400 E-03
	NDUFAF7	1.994014 E-03	8.702400 E-03
	TOPORS	2.081599 E-03	8.702400 E-03
	SNRPG	2.138424 E-03	8.702400 E-03
	ENSG00000262660, SLC25A10	2.224724 E-03	7.525357 E-05
	TMEM258	2.240659 E-03	8.702400 E-03
	EXOSC7	2.545623 E-03	8.702400 E-03
	LAMTOR5	2.553969 E-03	8.702400 E-03
	polymerase (DNA directed), eta	2.720536 E-03	8.702400 E-03
	WTAP	2.904171 E-03	8.702400 E-03
	SLIRP	2.910327 E-03	8.702400 E-03
	C2orf49	3.355202 E-03	8.702400 E-03
	CDC123	3.375595 E-03	8.702400 E-03
	hypothetical protein LOC55239	3.707463 E-03	8.702400 E-03
	NDUFB6	3.927156 E-03	8.702400 E-03
	SNW1	4.178509 E-03	8.702400 E-03
	FXYD5	4.250509 E-03	8.702400 E-03
	RPS14	4.346026 E-03	8.702400 E-03
	ALDH4A1	4.632778 E-03	8.702400 E-03
	C22orf29	5.200450 E-03	8.702400 E-03
	BBS2	5.276031 E-03	8.702400 E-03
	MYRF	5.404490 E-03	8.702400 E-03
	ESX1, ISX, PROP1, RAX, RAX2, ...	5.974840 E-03	1.103186 E-03
	E-1 enzyme	6.897941 E-03	8.702400 E-03
	HGD	7.139633 E-03	8.702400 E-03
	ASB4	7.892710 E-03	8.702400 E-03
	ZCCHC9	8.071248 E-03	8.702400 E-03
	ADI1	8.135578 E-03	8.702400 E-03
	KIAA0408	8.643347 E-03	8.702400 E-03
	RPS6	8.769705 E-03	8.702400 E-03
HGNC Gene Families
	NBPF	2.563881 E-68	0.0055115180
	COMI	1.530394 E-04	0.0004775971
	RPS	4.162734 E-04	0.0002088671
Ensembl Genes
	HAT1	2.726619 E-76	0.0087024
	METAP1D	3.470937 E-75	0.0087024
	PRKAB2	1.658868 E-71	0.0087024
	NBPF12	1.025339 E-67	0.0087024
	NBPF16	1.400396 E-23	0.0087024
	PPIAL4C	3.490361 E-23	0.0087024
	PGAM2	1.657756 E-06	0.0087024
	SARM1	1.918431 E-06	0.0087024
	TUBA8	5.615301 E-06	0.0087024
	SLC16A4	5.866285 E-06	0.0087024
	USP18	1.107854 E-04	0.0087024
	CHTOP	3.061027 E-04	0.0087024
	VTN	3.061027 E-04	0.0087024
	S100A1	3.780234 E-04	0.0087024
	SEBOX	3.975074 E-04	0.0087024
	PFN1	4.470318 E-04	0.0087024
	ENSG00000262660	4.558551 E-04	0.0087024
	FXYD7	5.877371 E-04	0.0087024
	TRDN	8.098641 E-04	0.0087024
	CLVS2	8.986837 E-04	0.0087024
	ENO3	1.059637 E-03	0.0087024
	OARD1	1.187567 E-03	0.0087024
	APOBEC2	1.211367 E-03	0.0087024
	ENSG00000255767	1.361392 E-03	0.0087024
	PYGM	1.377392 E-03	0.0087024
	PLEKHG2	1.395277 E-03	0.0087024
	RPS16	1.395277 E-03	0.0087024
	DBNDD2	1.411531 E-03	0.0087024
	GSK3A	1.479093 E-03	0.0087024
	STX5	1.504466 E-03	0.0087024
	METTL5	1.511038 E-03	0.0087024
	RASGRP2	1.586082 E-03	0.0087024
	SPSB2	1.611809 E-03	0.0087024
	LRRC23	1.624850 E-03	0.0087024
	MICAL1	1.838583 E-03	0.0087024
	SLC25A10	1.919204 E-03	0.0087024
	TP53TG5	1.986936 E-03	0.0087024
	NDUFAF7	1.994014 E-03	0.0087024
	PCYOX1	2.020342 E-03	0.0087024
	TOPORS	2.081599 E-03	0.0087024
	SNRPG	2.138424 E-03	0.0087024
	TMEM258	2.240659 E-03	0.0087024
	AGPAT2	2.431660 E-03	0.0087024
	EXOSC7	2.545623 E-03	0.0087024
	SYNPO2L	2.550000 E-03	0.0087024
	LAMTOR5	2.553969 E-03	0.0087024
	OVOL3	2.672193 E-03	0.0087024
	GTPBP2	2.705118 E-03	0.0087024
	POLH	2.720536 E-03	0.0087024
	HNRNPDL	2.848763 E-03	0.0087024
	WDR62	2.866877 E-03	0.0087024
	WTAP	2.904171 E-03	0.0087024
	SLIRP	2.910327 E-03	0.0087024
	C3	3.010601 E-03	0.0087024
	ENSG00000255330	3.037004 E-03	0.0087024
	SULT6B1	3.291733 E-03	0.0087024
	C2orf49	3.355202 E-03	0.0087024
	CDC123	3.375595 E-03	0.0087024
	FASTKD1	3.496162 E-03	0.0087024
	OGFOD1	3.707463 E-03	0.0087024
	VTI1B	3.769634 E-03	0.0087024
	NDUFB6	3.927156 E-03	0.0087024
	TRMT61B	3.961514 E-03	0.0087024
	AGAP5	3.988247 E-03	0.0087024
	TMED7-TICAM2	4.138112 E-03	0.0087024
	SNW1	4.178509 E-03	0.0087024
	MARK4	4.214281 E-03	0.0087024
	FXYD5	4.250509 E-03	0.0087024
	CKM	4.251322 E-03	0.0087024
	RPS14	4.346026 E-03	0.0087024
	CD74	4.581834 E-03	0.0087024
	ALDH4A1	4.632778 E-03	0.0087024
	KLHL41	4.718711 E-03	0.0087024
	NME1-NME2	5.137199 E-03	0.0087024
	MB	5.167099 E-03	0.0087024
	HIGD1A	5.171110 E-03	0.0087024
	C22orf29	5.200450 E-03	0.0087024
	BBS2	5.276031 E-03	0.0087024
	MYRF	5.404490 E-03	0.0087024
	MYZAP	5.834969 E-03	0.0087024
	SPDYA	5.924299 E-03	0.0087024
	HHATL	5.947936 E-03	0.0087024
	SEC61A2	6.154816 E-03	0.0087024
	HNRNPA0	6.190619 E-03	0.0087024
	TNFSF14	6.283416 E-03	0.0087024
	MYOT	6.363934 E-03	0.0087024
	SSB	6.461532 E-03	0.0087024
	TBX1	6.608493 E-03	0.0087024
	EGFL7	6.893279 E-03	0.0087024
	ENOPH1	6.897941 E-03	0.0087024
	DBNL	6.973495 E-03	0.0087024
	HGD	7.139633 E-03	0.0087024
	EID1	7.437488 E-03	0.0087024
	SLC7A3	7.812668 E-03	0.0087024
	SNX12	7.882939 E-03	0.0087024
	ASB4	7.892710 E-03	0.0087024
	ZCCHC9	8.071248 E-03	0.0087024
	ADI1	8.135578 E-03	0.0087024
	AHCY	8.269794 E-03	0.0087024
	CLEC3B	8.345548 E-03	0.0087024
	KIAA0408	8.643347 E-03	0.0087024
	RPS6	8.769705 E-03	0.0087024
	RBM15	9.021867 E-03	0.0087024
	PLEKHA2	9.191305 E-03	0.0087024
	ASIP	9.396301 E-03	0.0087024

## Sheet: T-cellGO
Ontology	Name	Binom_Raw_PValue	Hyper_Raw_PValue
GO Molecular Function
	unfolded protein binding	6.845241 E-05	7.723908 E-04
	endogenous lipid antigen binding	1.262395 E-04	1.550653 E-07
	exogenous lipid antigen binding	1.262395 E-04	1.550653 E-07
	beta-2-microglobulin binding	1.507670 E-04	8.968181 E-07
	lipopeptide binding	7.583151 E-04	3.025713 E-06
	peroxiredoxin activity	1.771540 E-03	2.527339 E-03
	DNA helicase activity	1.859303 E-03	7.509446 E-04
	CTP binding	3.467693 E-03	1.895811 E-03
	sulfonylurea receptor binding	3.467693 E-03	1.895811 E-03
	antigen binding	4.770045 E-03	6.501199 E-04
GO Biological Process
	regulation of apoptotic process	1.025451 E-36	7.396921 E-03
	regulation of programmed cell death	4.849750 E-36	9.244638 E-03
	translation	8.537705 E-18	4.604713 E-03
	centriol E-centriole cohesion	8.555311 E-16	5.522644 E-03
	centrosome cycle	1.152055 E-12	2.451836 E-04
	centrosome organization	1.314169 E-10	3.123840 E-03
	microtubule organizing center organization	5.994325 E-10	4.781761 E-03
	mitotic cell cycle phase transition	1.556501 E-08	1.761812 E-06
	cell cycle phase transition	1.670247 E-08	2.049899 E-06
	glycosphingolipid catabolic process	2.085505 E-07	6.082064 E-04
	ceramide catabolic process	3.771641 E-07	1.336832 E-03
	mitotic cell cycle	6.973218 E-07	3.594581 E-09
	G2/M transition of mitotic cell cycle	8.631547 E-07	8.414621 E-03
	sphingolipid catabolic process	4.628571 E-06	9.915093 E-03
	DNA conformation change	3.175555 E-05	2.925020 E-03
	DNA replication	4.819520 E-05	5.030655 E-05
	DNA metabolic process	4.900947 E-05	4.778660 E-05
	intracellular protein transport	5.580347 E-05	6.505317 E-03
	cell cycle	6.884699 E-05	2.551715 E-07
	chemokine metabolic process	7.540605 E-05	8.239458 E-05
	establishment or maintenance of microtubule cytoskeleton polarity	8.283297 E-05	5.522644 E-03
	DNA integrity checkpoint	1.054170 E-04	1.557521 E-03
	response to fungicide	1.521219 E-04	3.188485 E-04
	dibenzo-p-dioxin metabolic process	1.813667 E-04	7.712270 E-04
	DNA repair	3.316794 E-04	1.490493 E-04
	phthalate metabolic process	3.569363 E-04	7.712270 E-04
	cell cycle checkpoint	5.143707 E-04	9.984702 E-04
	cell cycle process	5.911830 E-04	1.800585 E-05
	biphenyl metabolic process	6.801094 E-04	7.712270 E-04
	DNA replication initiation	8.177928 E-04	3.581007 E-04
	progesterone metabolic process	9.915988 E-04	2.521396 E-03
	DNA strand elongation involved in DNA replication	1.207553 E-03	5.567052 E-04
	DNA replication-dependent nucleosome assembly	1.217848 E-03	1.895811 E-03
	DNA duplex unwinding	1.264375 E-03	4.591590 E-04
	DNA strand elongation	1.357153 E-03	8.008840 E-04
	testosterone biosynthetic process	1.552374 E-03	7.712270 E-04
	negative regulation of histone H3-K27 methylation	1.592442 E-03	5.522644 E-03
	fractalkine metabolic process	1.756014 E-03	1.895811 E-03
	antigen processing and presentation, exogenous lipid antigen via MHC class Ib	1.911410 E-03	3.025713 E-06
	antigen processing and presentation via MHC class Ib	2.261917 E-03	1.687096 E-05
	DNA replication-dependent nucleosome organization	2.920362 E-03	5.522644 E-03
	DNA geometric change	2.990396 E-03	6.700300 E-04
	centriole replication	3.014761 E-03	2.527339 E-03
	response to hydrogen peroxide	3.558444 E-03	3.802484 E-03
	G1/S transition of mitotic cell cycle	3.733750 E-03	9.096941 E-05
	androgen biosynthetic process	4.070647 E-03	2.521396 E-03
	protein localization	4.089742 E-03	6.116077 E-03
	cellular protein localization	4.644891 E-03	4.672368 E-03
	cellular macromolecule localization	4.794951 E-03	5.242041 E-03
	regulation of transcription involved in G1/S transition of mitotic cell cycle	5.577406 E-03	5.831624 E-04
	post-translational protein acetylation	5.616622 E-03	5.522644 E-03
	negative regulation of thymocyte apoptotic process	6.020706 E-03	7.712270 E-04
	lymphocyte aggregation	6.369139 E-03	1.895811 E-03
	response to luteinizing hormone stimulus	6.371311 E-03	1.895811 E-03
	establishment of protein localization to organelle	7.090708 E-03	4.248204 E-03
	regulation of granulocyte differentiation	7.376206 E-03	3.320808 E-03
	DNA-dependent DNA replication	7.445186 E-03	2.920513 E-03
	cellular response to DNA damage stimulus	8.468220 E-03	1.434287 E-03
	protein localization to organelle	8.911512 E-03	1.491506 E-03
	regulation of endodeoxyribonuclease activity	8.983389 E-03	5.522644 E-03
	macromolecule localization	9.443374 E-03	8.093633 E-03
GO Cellular Component
	oligosaccharyltransferase complex	4.106785 E-246	7.854952 E-03
	intracellular organelle part	8.781231 E-52	3.508565 E-08
	organelle part	3.824532 E-50	2.407057 E-08
	macromolecular complex	5.360760 E-50	2.271171 E-04
	protein complex	1.643404 E-42	2.278237 E-03
	cytoplasmic part	1.987117 E-21	1.147513 E-05
	intracellular membran E-bounded organelle	1.065992 E-19	1.830472 E-04
	membran E-bounded organelle	1.066594 E-19	8.742478 E-05
	cytoplasm	1.140884 E-19	1.412205 E-04
	small nucleolar ribonucleoprotein complex	1.563734 E-19	2.521396 E-03
	organelle	2.906342 E-19	3.608613 E-06
	intracellular organelle	3.408074 E-19	6.530288 E-06
	cell part	6.784416 E-19	3.500071 E-03
	cell	7.669240 E-19	3.542536 E-03
	intracellular part	1.572487 E-15	6.376974 E-07
	intracellular	1.406272 E-14	1.354059 E-06
	microtubule cytoskeleton	5.643275 E-07	6.083419 E-03
	nucleoplasm	1.888634 E-06	1.613070 E-05
	intracellular organelle lumen	5.525141 E-06	2.787990 E-06
	cell outer membrane	5.950891 E-06	3.188485 E-04
	organelle lumen	1.166006 E-05	4.322366 E-06
	membran E-enclosed lumen	1.528375 E-05	5.331749 E-06
	protein-DNA complex	2.301377 E-05	3.987945 E-04
	external encapsulating structure	3.166226 E-05	2.527339 E-03
	nuclear lumen	9.572772 E-05	1.935302 E-05
	spindle	1.364054 E-04	3.648077 E-03
	nuclear part	3.313407 E-04	4.466159 E-06
	chromosomal part	2.463969 E-03	3.751400 E-04
	intracellular non-membran E-bounded organelle	2.838240 E-03	5.480997 E-03
	CAF-1 complex	3.617458 E-03	5.522644 E-03
Mouse Phenotype
	abnormal thymus morphology	7.456949 E-97	0.0064573860
	embryonic lethality	3.108852 E-41	0.0062011400
	increased dendritic cell number	1.350255 E-26	0.0009048871
	decreased thymocyte number	2.181808 E-17	0.0043189430
	cellular phenotype	3.375599 E-15	0.0062549670
	decreased T cell number	1.713258 E-11	0.0002538048
	increased T cell number	4.373884 E-11	0.0088675610
	increased T cell proliferation	3.203227 E-09	0.0047292990
	abnormal T cell number	2.272452 E-08	0.0022329870
	increased liver tumor incidence	3.555817 E-08	0.0035124050
	increased hepatobiliary system tumor incidence	4.463232 E-08	0.0040600920
	decreased lymphocyte cell number	5.732149 E-08	0.0022436590
	decreased CD8-positive T cell number	8.116723 E-08	0.0020284310
	decreased CD4-positive T cell number	1.081964 E-07	0.0020469990
	decreased singl E-positive T cell number	1.176014 E-07	0.0002257068
	abnormal T cell morphology	1.322254 E-07	0.0050837490
	abnormal thymus lobule morphology	5.309484 E-07	0.0066828030
	abnormal CD8-positive T cell number	1.664735 E-06	0.0026939890
	abnormal lymphocyte physiology	3.601169 E-06	0.0048376430
	abnormal lymphocyte cell number	4.963005 E-06	0.0060757190
	abnormal CD8-positive T cell morphology	6.745301 E-06	0.0046837940
	abnormal singl E-positive T cell number	4.150774 E-05	0.0052770220
	abnormal immune cell physiology	9.212911 E-05	0.0043721450
	abnormal leukocyte physiology	1.008610 E-04	0.0041218290
	abnormal cell-mediated immunity	1.134865 E-04	0.0053771560
	abnormal adaptive immunity	1.961827 E-04	0.0073203990
	abnormal T cell differentiation	1.276522 E-03	0.0052162630
	abnormal response to transplant	2.406370 E-03	0.0070425890
	abnormal T cell physiology	3.507185 E-03	0.0067264010
	abnormal T cell subpopulation ratio	3.530859 E-03	0.0004272275
	increased acute lymphoblastic leukemia incidence	4.010663 E-03	0.0078549520
	absent inner cell mass proliferation	5.072662 E-03	0.0017859740
	abnormal circulating interleukin level	5.152745 E-03	0.0044360940
	abnormal gamma-delta T cell morphology	5.237825 E-03	0.0005373680
	myocarditis	5.914589 E-03	0.0067095390
	decreased gamma-delta T cell number	7.140960 E-03	0.0017859740
	decreased circulating magnesium level	8.208820 E-03	0.0025273390
Human Phenotype
	Severe intrauterine growth retardation	1.659273 E-33	1.895811 E-03
	Birth length <3rd percentile	8.948567 E-20	3.913264 E-03
	Recurrent bacterial infections	1.371398 E-15	7.702221 E-04
	Immunodeficiency	1.210663 E-14	4.315467 E-03
	Postnatal growth retardation	2.192942 E-10	1.549122 E-03
	Cerebellar vermis hypoplasia	4.269217 E-10	6.162140 E-03
	Aplasia/Hypoplasia of the cerebellar vermis	7.523004 E-10	7.897082 E-03
	Recurrent infections	2.178657 E-09	8.207645 E-06
	Respiratory tract infection	2.543808 E-09	3.263156 E-04
	Recurrent respiratory infections	3.792776 E-09	9.182901 E-04
	Abnormal electroretinogram	6.415715 E-09	9.498573 E-03
	Abnormality of the curvature of the cornea	8.023452 E-09	8.437419 E-03
	Hypoplasia of penis	1.739689 E-08	6.666233 E-03
	Genital hypoplasia	2.488025 E-08	6.951839 E-03
	Visual impairment	3.684319 E-08	7.041933 E-03
	Abnormality of metabolism/homeostasis	6.243203 E-08	4.435669 E-05
	Abnormality of glycosphingolipid metabolism	1.012203 E-06	3.913264 E-03
	Abnormality of immune system physiology	1.094192 E-06	2.035893 E-04
	Abnormality of the penis	2.706549 E-06	5.531244 E-03
	Delayed skeletal maturation	3.128409 E-06	5.043047 E-03
	Recurrent fungal infections	1.857824 E-05	1.789922 E-05
	Abnormality of blood and blood-forming tissues	2.048710 E-05	2.029741 E-03
	Micropenis	2.297788 E-05	7.281965 E-03
	Recurrent viral infections	1.181634 E-04	5.237587 E-05
	Abnormality of the lung	1.389262 E-04	5.798073 E-03
	Abnormality of the genitourinary system	1.655117 E-04	1.057502 E-03
	Combined immunodeficiency	2.205656 E-04	3.252938 E-05
	Abnormality of the genital system	2.362712 E-04	7.681091 E-03
	Abnormality of lymphocytes	4.097364 E-04	4.580772 E-04
	Panhypogammaglobulinemia	4.097811 E-04	5.749635 E-05
	Abnormality of B cells	4.604051 E-04	1.340242 E-03
	Abnormality of the immune system	5.137864 E-04	3.991099 E-04
	Pneumonia	7.230568 E-04	1.951555 E-03
	Abnormal respiratory system morphology	7.957521 E-04	5.398932 E-04
	Abnormality of the respiratory system	9.003741 E-04	2.497712 E-04
	Generalized abnormality of skin	1.000577 E-03	7.562614 E-03
	Abnormality of B cell physiology	1.135558 E-03	3.850311 E-03
	Lymphedema	1.205445 E-03	3.172909 E-03
	Hematological neoplasm	1.344586 E-03	2.181786 E-05
	Severe combined immunodeficiency	1.675503 E-03	2.174624 E-04
	Recurrent urinary tract infections	1.743890 E-03	9.758356 E-05
	Villous atrophy	2.830410 E-03	1.864804 E-03
	Recurrent candida infections	2.914848 E-03	1.895811 E-03
	Abnormality of the skin	2.988695 E-03	8.646388 E-04
	Pustule	3.054854 E-03	9.228979 E-04
	Abnormal immunoglobulin level	3.107935 E-03	9.610972 E-03
	Eye poking	3.200653 E-03	1.895811 E-03
	B lymphocytopenia	3.328444 E-03	1.126202 E-04
	Urinary bladder inflammation	3.709416 E-03	2.429033 E-04
	Premature chromatid separation	3.796603 E-03	5.522644 E-03
	Breech presentation	3.853688 E-03	5.680929 E-03
	Abnormality of body weight	3.856441 E-03	3.023258 E-03
	Severe B lymphocytopenia	3.921533 E-03	3.188485 E-04
	Abnormality of B cell number	3.984874 E-03	2.174624 E-04
	Abnormality of T cells	4.257432 E-03	9.511151 E-04
	Abnormality of T cell physiology	4.509804 E-03	1.760946 E-03
	CNS infection	4.982763 E-03	1.785974 E-03
	Short stature	5.303221 E-03	5.932331 E-03
	Abnormality of thrombocytes	5.742590 E-03	3.795703 E-03
	Diarrhea	6.145647 E-03	1.172335 E-04
	Thrombocytopenia	6.409980 E-03	3.200832 E-03
	Abnormality of the abdominal organs	6.513969 E-03	2.156982 E-03
	Meningitis	6.672354 E-03	1.348266 E-03
	Abnormal platelet count	7.424811 E-03	4.073028 E-03
	Pseudobulbar signs	7.451768 E-03	5.680929 E-03
	Caf E-au-lait spot	8.579089 E-03	1.549122 E-03
	Episodic ketoacidosis	9.136399 E-03	1.895811 E-03
Disease Ontology
	pleural tuberculosis	0.0007015695	6.082064 E-04
	pleurisy	0.0007867595	1.336832 E-03
	epidermodysplasia verruciformis	0.0008117837	4.999479 E-05
MSigDB Oncogenic Signatures
	Genes up-regulated in primary keratinocytes from RB1 and RBL2 [Gene ID=5925, 5934] skin specific knockout mice.	8.475934 E-05	1.527754 E-05
	Genes down-regulated in CD34+ hematopoietic progenitor cells after knockdown of RPS14 [Gene ID=6208] by RNAi.	3.836174 E-04	1.585364 E-04
	Genes up-regulated in granule cell neuron precursors (GCNPs) after stimulation with Shh for 24h.	2.132815 E-03	1.607692 E-05
	Genes up-regulated in mouse fibroblasts over-expressing E2F1 [Gene ID=1869] gene.	7.169321 E-03	1.480313 E-03
MSigDB Immunologic Signatures
	Genes down-regulated in comparison of B cells from influenza vaccinee at day 7 post-vaccination versus plasmacytoid dendritic cells (pDC) at day 7 post-vaccination.	3.007321 E-122	2.101349 E-03
	Genes up-regulated in comparison of lung tissue from wild type mice subjected to ozone for 0 h versus that from wild type mice subjected to ozone for 6 h.	9.418639 E-117	8.992138 E-04
	Genes up-regulated in comparsion of sfActCD4TGF versus ActCD4TGF (see Fig. 1 in the paper for details).	9.989345 E-113	5.197854 E-03
	Genes up-regulated in comparison of CD25- T cells treated with IL4 [GeneID=3565] at day 10 versus untreated CD25- T cells at day 10.	2.284887 E-101	3.089145 E-03
	Genes up-regulated in comparison of CD4 [GeneID=920] CD8 thymocytes versus T cells from cord blood.	4.176695 E-13	1.149222 E-05
	Genes up-regulated in comparison of naive CD4 [GeneID=920] CD8 T cells versus unstimulated NK cells.	6.870439 E-13	2.120366 E-04
	Genes up-regulated in comparison of healthy B cells versus healthy myeloid cells.	7.174318 E-12	9.591743 E-04
	Genes up-regulated in comparison of na√É¬Øve CD8 T cells versus effector CD8 T cells.	1.889994 E-11	1.446171 E-04
	Genes up-regulated in comparison of macrophages versus macrophages exposed to L. major.	7.593208 E-10	2.626712 E-03
	Genes down-regulated in comparison of untreated CD4 [GeneID=920] T cells versus those treated with IL6 [GeneID=3569] and IL23A [GeneID=51561].	5.005341 E-09	5.468153 E-03
	Genes down-regulated in comparison of CD4 [GeneID=920] dendritic cells (DC) versus CD8 DCs.	5.291336 E-09	2.773953 E-03
	Genes up-regulated in comparsion of ActTreg versus ActTregTGF (see Fig. 1 in the paper for details).	1.622482 E-08	3.721675 E-06
	Genes down-regulated in comparison of B cells from TIV influenza vaccinee pr E-vaccination versus those at day 7 post-vaccination.	1.664537 E-08	4.451661 E-03
	Genes up-regulated in comparison of splenic secondary CD8 effector T cells at day 8 post-acute infection versus splenic secondary CD8 effector T cells at day 8 post-chronic infection.	2.149018 E-08	6.147173 E-04
	Genes up-regulated in comparison of control conventional dendritic cells (cDC) at 0 h versus cDCs infected with Newcastle disease virus (NDV) at 18 h.	5.606301 E-08	5.468153 E-03
	Genes down-regulated in plasma cells versus naive B cells.	5.692917 E-08	3.935330 E-04
	Genes up-regulated in comparison of unstimulated CD8 T cells at 48 h versus CD8 T cells at 48 h after stimulation with antigen-B7-1.	7.959857 E-08	5.468153 E-03
	Genes up-regulated in comparison of naive CD8 T cells versus exhausted CD8 T cells.	2.530518 E-07	4.689938 E-03
	Genes up-regulated in comparison of CD25- T cells treated with IL4 [GeneID=3565] at day 7 versus untreated CD25- T cells at day 7.	3.153654 E-07	4.436094 E-03
	Genes down-regulated in comparison of regulatory T cells versus conventional T cells.	3.781291 E-07	1.393712 E-03
	Genes down-regulated in comparison of untreated CD4 [GeneID=920] memory T cells from old donors versus those treated with TSST at 72 h.	4.281234 E-07	6.843993 E-05
	Genes up-regulated in comparison of intrathymic T progenitor cells (ITTP) versus naive CD4 [GeneID=920] T cells from adult blood.	4.853821 E-07	3.447535 E-08
	Genes down-regulated in comparison of exhausted CD8 T cells versus memory CD8 T cells.	1.470036 E-06	2.619787 E-04
	Genes up-regulated in comparison of systemic lupus erythematosus CD4 [GeneID=920] T cells versus systemic lupus erythematosus myeloid cells.	1.743579 E-06	7.405730 E-05
	Genes down-regulated in comparison of untreated CD4 [GeneID=920] memory T cells from young donors versus those treated with TSST at 72 h.	2.055765 E-06	1.446171 E-04
	Genes up-regulated in comparison of effector CD8 T cells at the peak expansion phase (day8) versus those at contraction (day 15) after LCMV-Armstrong infection.	2.167137 E-06	7.340322 E-03
	Genes up-regulated in comparison of naive CD8 T cells versus unstimulated neutrophils.	6.240274 E-06	4.689938 E-03
	Genes down-regulated in comparison of basophils versus central memory CD4 [GeneID=920] T cells.	8.357331 E-06	4.938560 E-03
	Genes up-regulated in comparison of fetal conventional T cells versus adult conventional T cells.	1.530551 E-05	9.562086 E-04
	Genes up-regulated in comparison of eosinophils versus neutrophils.	1.712040 E-05	5.749795 E-03
	Genes down-regulated in plasma cells versus memory B cells.	1.876259 E-05	3.795703 E-03
	Genes up-regulated in comparison of dendritic cells (DC) versus neutrophils.	2.160909 E-05	9.975042 E-03
	Genes up-regulated in comparison of NK cells treated with IL15 [GeneID=3567] versus untreated NK cells.	2.586224 E-05	3.395861 E-06
	Genes down-regulated in comparison of untreated CD4 [GeneID=920] memory T cells from young donors versus those treated with TSST at 40 h.	2.949047 E-05	6.043123 E-03
	Genes up-regulated in comparison of CD25+ regulatory T cell (Treg) treated with IL4 [GeneID=3565] at day 7 versus CD25- T cells treated with IL4 [GeneID=3565] at day 7.	5.075567 E-05	8.365206 E-04
	Genes up-regulated in comparison of CD4 [GeneID=920] thymocytes versus naive CD4 [GeneID=920] T cells from adult blood.	5.465504 E-05	1.448716 E-03
	Genes up-regulated in comparison of control dendritic cells (DC) at 1 h versus those stimulated with Pam3Csk4 (TLR1/2 agonist) at 1 h.	1.513748 E-04	9.071505 E-03
	Genes down-regulated in comparison of naive T cells at day 0 versus CD25+ regulatory T cell (Treg) treated with IL4 [GeneID=3565] at day 7.	1.533515 E-04	9.984702 E-04
	Genes down-regulated in comparison of memory CD8 T cells versus naive CD8 T cells.	1.562977 E-04	8.451567 E-04
	Genes up-regulated in comparison of wild type CD8 effector T cells at day 6 versus those from mice defficient for TRAF6 [GeneID=7189] at day 10.	1.846821 E-04	5.330424 E-06
	Genes down-regulated in comparison of untreated CD4 [GeneID=920] memory T cells from old donors versus those treated with TSST at 40 h.	2.649967 E-04	1.553025 E-04
	Genes down-regulated in comparison of CD8 T cells at 0 h versus those at 24 h.	2.773730 E-04	4.486381 E-04
	Genes down-regulated in comparison of naive CD8 T cells versus effector CD8 T cells.	4.038862 E-04	1.773315 E-06
	Genes down-regulated in comparison of eosinophils versus Th1 cells.	4.584273 E-04	3.444179 E-04
	Genes up-regulated in comparison of splenic primary CD8 effector T cells at day 8 post-acute infection versus splenic secondary CD8 effector T cells at day 8 post-acute infection.	5.837949 E-04	3.721675 E-06
	Genes down-regulated in comparison of unstimulated NK cells versus those stimulated with IL2 [GeneID=3558] at 16 h.	6.388342 E-04	3.089145 E-03
	Genes down-regulated in comparison of CD8 T cells at 0 h versus those at 24 h after stimulation with antigen-B7-1.	8.798872 E-04	1.146123 E-03
	Genes up-regulated in comparison of effector CD8 T cells versus memory CD8 T cells.	8.838785 E-04	7.372365 E-05
	Genes down-regulated in comparison of CD8 T cells at 0 h versus those at 24 h after stimulation with IL12 .	1.008206 E-03	1.146123 E-03
	Genes up-regulated in comparison of B cells versus neutrophils.	1.252158 E-03	4.451661 E-03
	Genes down-regulated in comparison of DN2 thymocytes versus DN3 thymocytes.	1.361082 E-03	4.460353 E-06
	Genes down-regulated in comparison of IgD+ B cells from peripheral blood versus CD19 pr E-germinal center tonsil B cell	1.406919 E-03	2.520954 E-05
	Genes down-regulated in comparison of CD4- [GeneID=920] CD8- thymocytes versus CD4+ [GeneID=920] CD8+ thymocytes.	1.552770 E-03	1.984795 E-03
	Genes down-regulated in comparison of CD8 T cells at 0 h versus those at 48 h.	2.501581 E-03	6.043123 E-03
	Genes down-regulated in comparison of IgD+ B cells versus IgD- B cells.	2.521156 E-03	1.022294 E-03
	Genes up-regulated in comparison of control CD4 [GeneID=920] CD8 thymocytes versus those after stimulation with anti-Vbeta5 antibodies.	3.518180 E-03	3.721675 E-06
	Genes down-regulated in comparison of unstimulated memory CD4 [GeneID=920] CD8 T cells versus stimulated CD4 [GeneID=920] CD8 T cells.	4.371151 E-03	1.016269 E-03
	Genes up-regulated in comparison of effector CD8 T cells versus exhausted CD8 T cells.	5.002838 E-03	2.486059 E-03
	Genes down-regulated in comparison of memory CD4 [GeneID=920] T cells versus Th2 cells.	6.254208 E-03	1.058115 E-03
	Genes down-regulated in comparison of naive CD8 T cells versus effector CD8 T cells KLRG1 high [GeneID=10219].	6.866381 E-03	1.446171 E-04
	Genes up-regulated in comparison of wild type CD8 effector T cells at day 6 versus those at day 10.	7.453835 E-03	1.080843 E-04
	Genes up-regulated in comparsion of ActCD8 versus ActTreg (see Fig. 1 in the paper for details).	7.844649 E-03	3.795703 E-03
	Genes down-regulated in comparison of neutrophils versus Th1 cells.	7.946706 E-03	6.993872 E-04
	Genes up-regulated in comparison of untreated CD25+ T effector cells at day 7 versus untreated CD25- T cells at day 7.	8.534701 E-03	3.970585 E-04
	Genes down-regulated in comparison of memory CD8 T cells versus effector CD8 T cells KLRG1 high [GeneID=10219].	8.741311 E-03	1.307125 E-05
	Genes down-regulated in comparison of thymic progenitors versus DN3 thymocytes.	9.302507 E-03	5.052077 E-05
	Genes down-regulated in comparison of lung tissue from wild type mice subjected to ozone for 0 h versus that from wild type mice subjected to ozone for 48 h.	9.475666 E-03	2.486059 E-03
	Genes down-regulated in comparison of memory CD4 [GeneID=920] T cells versus Th1 cells.	9.652890 E-03	1.289881 E-03
MSigDB Cancer Neighborhood
	Neighborhood of TPR	7.882068 E-29	5.465739 E-04
	Neighborhood of PHB	7.907026 E-20	7.961499 E-04
	Neighborhood of SS18	5.360718 E-19	2.793597 E-04
	Neighborhood of ERCC2	3.660255 E-18	3.850311 E-03
	Neighborhood of RFC1	1.094615 E-17	7.938576 E-03
	Neighborhood of FBL	4.936978 E-16	1.162696 E-04
	Neighborhood of IKBKG	8.544525 E-15	5.043047 E-03
	Neighborhood of G22P1	1.159165 E-14	1.798990 E-05
	Neighborhood of REV3L	2.683107 E-13	2.483995 E-03
	Neighborhood of BUB3	3.339257 E-13	3.436353 E-05
	Neighborhood of EIF3S2	3.521394 E-13	7.695174 E-05
	Neighborhood of TERF2IP	1.180389 E-12	1.382790 E-03
	Neighborhood of EIF3S6	1.308258 E-12	7.961499 E-04
	Neighborhood of UBE2I	1.434520 E-12	8.880659 E-04
	Neighborhood of CSNK2B	2.590114 E-12	1.867210 E-03
	Neighborhood of FANCG	2.769014 E-12	1.808950 E-03
	Neighborhood of RPA2	6.591203 E-12	9.514760 E-03
	Neighborhood of APEX1	1.516314 E-11	6.191081 E-03
	Neighborhood of RAD23A	4.602286 E-11	1.517313 E-04
	Neighborhood of FBL	8.080642 E-11	4.980142 E-03
	Neighborhood of RAN	9.744981 E-11	3.877833 E-03
	Neighborhood of ANP32B	9.770429 E-11	6.348485 E-03
	Neighborhood of SOD1	2.086715 E-09	2.756352 E-03
	Neighborhood of ACTG1	3.151075 E-06	1.796542 E-04
	Neighborhood of NPM1	3.382527 E-06	1.162113 E-04
	Neighborhood of VAV1	1.816244 E-05	7.509446 E-04
	Neighborhood of ACP1	2.322737 E-05	2.353603 E-05
	Neighborhood of ORC1L	3.334014 E-05	1.810874 E-04
	Neighborhood of BUB1B	4.890828 E-05	7.432239 E-07
	Neighborhood of ACTG1	1.085140 E-04	1.282122 E-03
	Neighborhood of HEAB	1.362262 E-04	1.818924 E-03
	Neighborhood of CTBP1	1.400615 E-04	1.156632 E-03
	Neighborhood of NME2	1.862969 E-04	9.267666 E-03
	Neighborhood of BUB1B	2.369560 E-04	2.313671 E-04
	Neighborhood of FEN1	2.739692 E-04	4.741423 E-04
	Neighborhood of TPT1	2.740147 E-04	6.022620 E-03
	Neighborhood of PPP5C	3.098423 E-04	4.883069 E-03
	Neighborhood of RRM2	3.138550 E-04	4.373547 E-05
	Neighborhood of PTPN11	3.282806 E-04	2.399758 E-03
	Neighborhood of GSPT1	3.663431 E-04	5.053046 E-03
	Neighborhood of NPM1	3.784973 E-04	6.124733 E-03
	Neighborhood of CCNB2	3.905880 E-04	1.342211 E-04
	Neighborhood of RFC4	7.491983 E-04	2.793597 E-04
	Neighborhood of PRKDC	7.774610 E-04	6.993872 E-04
	Neighborhood of BUB1	9.259174 E-04	9.048871 E-04
	Neighborhood of MCM4	9.817296 E-04	4.272275 E-04
	Neighborhood of ANP32B	1.011030 E-03	4.268718 E-03
	Neighborhood of GNB1	1.434835 E-03	9.322585 E-04
	Neighborhood of HDAC1	1.461215 E-03	8.627185 E-03
	Neighborhood of RRM1	1.514991 E-03	9.575084 E-05
	Neighborhood of PCNA	1.793272 E-03	1.380937 E-04
	Neighborhood of ESPL1	1.855808 E-03	4.781761 E-03
	Neighborhood of ESPL1	2.043127 E-03	8.008840 E-04
	Neighborhood of RAD54L	2.091138 E-03	5.808574 E-04
	Neighborhood of CDC20	2.520901 E-03	6.501199 E-04
	Neighborhood of DENR	2.808577 E-03	1.325688 E-03
	Neighborhood of MSH2	3.444775 E-03	6.611738 E-03
	Neighborhood of XRCC5	3.976557 E-03	3.909132 E-03
	Neighborhood of TTK	4.525704 E-03	1.317565 E-03
	Neighborhood of HDAC2	4.792585 E-03	5.234454 E-03
	Neighborhood of CCNA2	4.827386 E-03	6.848403 E-04
	Neighborhood of DDX5	5.601712 E-03	1.936876 E-03
	Neighborhood of CCNF	6.569255 E-03	3.837732 E-04
	Neighborhood of SMC4L1	7.032407 E-03	1.021108 E-03
	Neighborhood of PRDX3	8.963826 E-03	3.487804 E-03
BioCyc Pathway
	superpathway of steroid hormone biosynthesis	0.003608065	0.001864804
MSigDB Pathway
	The SARS-coronavirus Life Cycle	2.723759 E-23	7.854952 E-03
	Genes involved in Cell Cycle	5.684246 E-15	2.228073 E-09
	Genes involved in Cell Cycle, Mitotic	8.276864 E-13	8.591995 E-10
	TCR signaling in na&amp;#xef;ve CD4+ T cells	1.602113 E-12	7.042589 E-03
	Genes involved in Loss of Nlp from mitotic centrosomes	5.564333 E-11	6.501199 E-04
	Genes involved in Recruitment of mitotic centrosome proteins and complexes	2.022111 E-10	1.549122 E-03
	Genes involved in Mitotic G2-G2/M phases	5.886800 E-09	6.704143 E-03
	Genes involved in DNA Replication	7.298598 E-08	1.546826 E-08
	Genes involved in Activation of ATR in response to replication stress	7.938200 E-08	1.034062 E-04
	Genes involved in G2/M Checkpoints	8.711971 E-08	5.388974 E-05
	Genes involved in Mitotic M-M/G1 phases	4.487794 E-07	9.463619 E-08
	Antigen processing and presentation	7.817873 E-07	6.741386 E-04
	Genes involved in G2/M DNA damage checkpoint	1.876486 E-06	5.680929 E-03
	Genes involved in Cell Cycle Checkpoints	5.388046 E-06	3.971225 E-04
	Primary immunodeficiency	5.509799 E-06	1.584364 E-06
	Genes involved in M/G1 Transition	5.859598 E-05	1.697939 E-04
	Genes involved in Activation of the pr E-replicative complex	8.863145 E-05	3.119523 E-05
	Genes involved in Synthesis of DNA	1.141775 E-04	6.351967 E-04
	Genes involved in Unwinding of DNA	1.203261 E-04	9.228979 E-04
	Genes involved in Assembly of the pr E-replicative complex	1.886197 E-04	1.936876 E-03
	Fanconi anemia pathway	2.335290 E-04	3.523269 E-03
	Genes involved in DNA strand elongation	3.841500 E-04	2.451836 E-04
	Genes involved in Mitotic G1-G1/S phases	3.925495 E-04	2.216467 E-04
	CDK Regulation of DNA Replication	7.057130 E-04	8.264779 E-04
	Genes involved in G1/S Transition	9.268854 E-04	9.099801 E-04
	Genes involved in Orc1 removal from chromatin	1.006909 E-03	8.437419 E-03
	Genes involved in S Phase	1.837084 E-03	2.804000 E-03
	Genes involved in Mitotic Prometaphase	2.409745 E-03	3.395556 E-04
	DNA replication	3.808396 E-03	8.008840 E-04
	Viral myocarditis	5.168663 E-03	2.659831 E-03
	Genes involved in Generation of second messenger molecules	5.320156 E-03	4.754354 E-03
	Genes involved in G1/S-Specific Transcription	5.478635 E-03	5.402192 E-03
	Cell cycle	6.119132 E-03	3.246687 E-04
MGI Expression: Detected
	TS28_pyloric antrum	3.454786 E-79	0.0051001430
	TS28_stomach fundus	2.979613 E-78	0.0032862770
	TS22_trachea	1.539985 E-44	0.0001062888
	TS22_lower respiratory tract	1.333311 E-40	0.0004408230
	TS22_respiratory tract	1.407146 E-40	0.0004686943
	TS22_liver	1.822081 E-34	0.0040337850
	TS22_pancreas	4.099987 E-31	0.0043732080
	TS22_axial skeleton	7.228011 E-31	0.0090299510
	TS22_oesophagus	3.140516 E-30	0.0088217800
	TS22_gland	6.990772 E-24	0.0049312110
	TS22_metanephros	3.678532 E-21	0.0024236730
	TS22_foregut	1.594245 E-16	0.0099066000
	TS23_haemolymphoid system	7.220763 E-04	0.0004567334
	TS23_thymus primordium	7.387480 E-04	0.0005056251
	TS23_gland	1.326942 E-03	0.0002562822
	TS10_syncytiotrophoblast	4.305539 E-03	0.0018958110
	TS28_mesovarium	4.883012 E-03	0.0055226440
	TS23_talus	7.863517 E-03	0.0055226440
MSigDB Perturbation
	Genes up-regulated in DO11.10 cells (hybridoma) by expression of transciptionally activating form of HDAC7 [GeneID=51564] and down-regulated by its transcriptionally repressing form.	1.885344 E-126	2.276649 E-04
	Genes down-regulated in ALL (acute lymphoblastic leukemia) blasts after 1 week of treatment with glucocorticoids.	4.082776 E-103	1.710283 E-07
	Genes whose expression significantly and positively correlated with oligodendrocyte density in layer VI of BA9 brain region in patients with bipolar disorder.	2.120173 E-94	6.636288 E-06
	Genes whose expression was significantly and positively correlated with the number of perineuronal oligodendrocytes in the layer III of BA9 brain region.	1.224280 E-90	3.674223 E-04
	Genes up-regulated in CD34+ [GeneID=947] cells isolated from bone marrow of CML (chronic myelogenous leukemia) patients, compared to those from normal donors.	3.196303 E-64	1.660208 E-03
	Genes down-regulated in NB4 cells (acute promyelocytic leukemia, APL) in response to tretinoin [PubChem=444795]; based on Chip-seq data.	1.246045 E-20	8.932761 E-05
	Genes down-regulated by overexpression of MAD1 [GeneID=4084] in primary thymocytes from RAG2 [GeneID=5897] knockout mice.	4.951791 E-16	8.709580 E-04
	Genes up-regulated in robust Cluster 2 (rC2) of hepatoblastoma samples compared to those in the robust Cluster 1 (rC1).	1.367805 E-15	4.996901 E-07
	The 'core ESC-like gene module': genes coordinately up-regulated in a compendium of mouse embryonic stem cells (ESC) which are shared with the human ESC-like module.	9.369516 E-12	6.818403 E-07
	Genes down-regulated in primary endothelial cells (HUVEC) after knockdown of WTAP [GeneID=9589] by RNAi.	1.071247 E-11	3.455831 E-03
	Genes down-regulated in RAW 264.7 cells (macrophage) 3 hr after stimulation with bacterial lipopolysaccharide (LPS).	2.854750 E-11	2.711226 E-03
	Genes commonly down-regulated in CD-1 and CD-2 clusters of multiple myeloma samples and which were higher expressed in the CD-1 group.	6.506744 E-11	2.313671 E-04
	Housekeeping genes identified as expressed across 19 normal tissues.	7.201716 E-11	4.109400 E-03
	Genes up-regulated in SKOC-3 cells (ovarian cancer) after YB-1 (YBX1) [GeneID=4904] knockdown by RNAi.	7.224105 E-11	9.557356 E-07
	Genes up-regulated in MCF7 cells (breast cancer) at 24 h of estradiol [PubChemID=5757] treatment.	9.447473 E-11	4.353289 E-14
	Genes up-regulated in hepatocellular carcinoma (HCC) compared to normal liver samples.	1.141719 E-10	8.654641 E-05
	Genes constituting the CHEK2-PCC network of transcripts whose expression positively correlates (Pearson correlation coefficient, PCC &gt;= 0.4) with that of CHEK2 [GeneID=11200].	2.900470 E-10	1.468514 E-08
	Down-regulated genes whose expression profile is specific to Custer I of urothelial cell carcinoma (UCC) tumors.	4.221994 E-10	4.685322 E-07
	Genes constituting the BRCA1-PCC network of transcripts whose expression positively correlated (Pearson correlation coefficient, PCC &gt;= 0.4) with that of BRCA1 [GeneID=672] across a compendium of normal tissues.	1.612193 E-09	2.704925 E-07
	Genes down-regulated in BJAB cells (B-lymphoma) after glutamine [PubChem=738] deprivation.	2.388573 E-09	6.787911 E-04
	Genes constituting the PluriNet protein-protein network shared by the pluripotent cells (embryonic stem cells, embryonical carcinomas and induced pluripotent cells).	3.745050 E-09	6.749388 E-05
	Genes up-regulated at early stages of progenitor T lymphocyte maturation compared to the late stages.	8.311388 E-09	2.473390 E-13
	Genes down-regulated in PaCa44 and CFPAC1 cells (pancreatic cancer) after treatment with decitabine [PubChem=451668], a DNA hypomethylating agent similar to azacitidine [PubChem=9444].	1.213100 E-08	2.043910 E-03
	Genes constituting the BRCA2-PCC network of transcripts whose expression positively correlated (Pearson correlation coefficient, PCC &gt;= 0.4) with that of BRCA2 [GeneID=675] across a compendium of normal tissues.	1.468037 E-08	1.926762 E-13
	Genes down-regulated in metastatic vs non-metastatic HNSCC (head and neck squamous cell carcinoma) samples.	1.938167 E-08	5.889534 E-03
	Genes enriched at every T lymphocyte differentiation stage compared to the early passage fetal thymic stromal cultures (TSC).	2.538411 E-08	4.602899 E-05
	Genes down-regulated in HL-60 cells (acute promyelocytic leukemia, APL) after treatment with the aminopeptidase inhibitor tosedostat (CHR-2797) [PubChem=15547703] for 24 h.	2.937015 E-08	1.247611 E-04
	Genes constituting the ATM-PCC network of transcripts whose expression positively correlated (Pearson correlation coefficient, PCC &gt;= 0.4) with that of ATM [GeneID=472] across a compendium of normal tissues.	6.970877 E-08	1.590294 E-06
	Genes up-regulated in aorta biopsies from mice treated with rosiglitazone [PubChem=77999].	7.068609 E-08	1.122665 E-03
	Down-regulated genes in the B lymphocyte developmental signature based on expression profiling of lymphomas from the Emu-myc transgenic mice: the immature B stage.	9.528819 E-08	1.542926 E-08
	Genes up-regulated in MEF cells (embryonic fibroblasts) at 16 hr after serum stimulation and knockdown of E2F3 [GeneID=1871] by RNAi.	4.765156 E-07	1.642717 E-07
	Genes down-regulated in PC3 cells (prostate cancer) after knockdown of EZH2 [GeneID=2146] by RNAi.	4.939150 E-07	9.594048 E-05
	Genes with promoters bound by E2F4 [GeneID=1874] in unstimulated hybridoma cells.	7.103649 E-07	1.460040 E-06
	Up-regulated genes in the subpopulation of invasive PyMT cells (breast cancer) compared to the general population of PyMT cells.	8.789843 E-07	8.446326 E-04
	Genes down-regulated in ANBL-6 cell line (multiple myeloma, MM) expressing a constantly active form of NRAS [GeneID=4893] off a plasmid vector compared to those grown in the presence of IL6 [GeneID=3569].	3.621092 E-06	7.445994 E-08
	Genes down-regulated in H1975 cells (non-small cell lung cancer, NSCLC) resistant to gefitinib [PubChem=123631] after treatment with EGFR inhibitor CL-387785 [PubChem=2776] for 24h.	5.957747 E-06	4.743978 E-08
	A list of known cell cycle regulated genes that was compiled from the literature by the authors.	6.396991 E-06	1.500298 E-05
	Genes up-regulated in TC71 and EWS502 cells (Ewing's sarcoma) by EWSR1-FLI1 [GeneID=2130;2314] as inferred from RNAi knockdown of this fusion protein.	6.632193 E-06	1.191955 E-12
	Genes down-regulated in intestinal crypt cells upon deletion of CTNNB1 [GeneID=1499].	8.133585 E-06	1.543211 E-08
	Genes up-regulated in gastric cancer cell lines: doxorubicin [PubChem=31703] resistant vs sensitive.	1.038852 E-05	3.903112 E-07
	Genes up-regulated during differentiation from large pr E-BII to small pr E-BII lymphocyte.	1.297772 E-05	4.424583 E-06
	Up-regulated genes in the B lymphocyte developmental signature, based on expression profiling of lymphomas from the Emu-myc transgenic mice: the Large Pr E-BII stage.	1.362784 E-05	1.299438 E-06
	Up-regulated genes whose expression correlated with histologic grade of invasive breast cancer tumors: comparison of grade 1 vs grade 3.	1.404823 E-05	2.619016 E-05
	The 'Cervical Cancer Proliferation Cluster' (CCPC): genes whose expression in cervical carcinoma positively correlates with that of the HPV E6 and E7 oncogenes; they are also differentially expressed according to disease outcome.	1.490497 E-05	7.133952 E-07
	Genes up-regulated during later stage of differentiation of Oli-Neu cells (oligodendroglial precursor) in response to PD174265 [PubChemID=4709].	1.537132 E-05	1.139640 E-10
	Genes down-regulated in nasopharyngeal carcinoma (NPC) compared to the normal tissue.	1.727281 E-05	2.993806 E-07
	Genes down-regulated in MCF-7 cells (breast cancer) after knockdown of YBX1 [GeneID=4904] by RNAi.	2.180529 E-05	9.884750 E-09
	Top 50 up-regulated genes in cluster PR of multiple myeloma samples characterized by increased expression of proliferation and cell cycle genes.	2.218677 E-05	1.500298 E-05
	Genes up-regulated in P493-6 cells (B lymphocyte, Burkitt's lymphoma model) by MYC [GeneID=4609] and down-regulated by RNAi knockdown of TFRC [GeneID=7037].	2.649400 E-05	9.628186 E-06
	Genes downstream of both CDKN1A and TP53 [GeneID=1026;7157] in 2774qw1 cells (ovarian cancer).	3.007923 E-05	4.099872 E-06
	Genes up-regulated in NIH3T3 cells (fibroblasts) transformed by expression of contitutively active (Q63L) form of RHOA [GeneID=387] off plasmid vector.	3.579261 E-05	3.341608 E-06
	Top 50 up-regulated markers distinguishing diffuse large B-cell lymphoma (DLBCL) from follicular lymphoma (FL) samples.	4.663223 E-05	1.166160 E-04
	Nearest neighbors of HOX11 [GeneID=3195], based on the close agreement of their expression profiles with that of HOX11 in pediatric T cell acute lymphoblastic leukemia (T-ALL).	6.007482 E-05	2.545555 E-07
	Genes down-regulated in HL-60 cells (acute promyelocytic leukemia, APL) after treatment with the aminopeptidase inhibitor tosedostat (CHR-2797) [PubChem=15547703] for 6 h.	6.265209 E-05	1.006965 E-03
	Genes down-regulated in the ANBL-6 cell line (multiple myeloma, MM) after withdrawal of IL6 [GeneID=3569].	6.645539 E-05	1.191897 E-06
	Proteins with reduced expression in mulignant glioma cell line (A172) which bears loss of heterozygosity (LOH) in the 1p region.	6.919888 E-05	4.530629 E-04
	Genes down-regulated in neural stem cells (NSC) at 60 h after cr E-lox knockout of TLX (NR2E1) [GeneID=7101].	9.752269 E-05	3.089797 E-07
	Genes down-regulated in response to both hypoxia and overexpression of an active form of HIF1A [GeneID=3091].	1.074805 E-04	3.436353 E-05
	Genes down-regulated in BJAB cells (B-lymphoma) after leucine [PubChem=857] deprivation.	1.202574 E-04	5.043265 E-04
	Genes whose expression profile is specific to Cluster III of urothelial cell carcinoma (UCC) tumors.	1.535242 E-04	3.338479 E-06
	Genes down-regulated in mature plasma cells compared with plasmablastic B lymphocytes.	1.585093 E-04	2.136805 E-06
	Genes down-regulated in Wilm's tumor samples compared to fetal kidney.	2.063280 E-04	6.503980 E-07
	Genes up-regulated in non-spontaneously immortalizing (NSI) primary breast cancer tumor cultures upon expression of TERT [GeneID=7015] off a retroviral vector.	2.163687 E-04	4.954226 E-03
	Cluster 6 of method A: up-regulation of these genes in patients with non-small cell lung cancer (NSCLC) predicts poor survival outcome.	2.272056 E-04	2.726685 E-08
	Top genes up-regulated in MM4 vs MM1 subgroup of multiple myeloma samples.	2.791833 E-04	3.048975 E-04
	Cluster P6 of genes with similar expression profiles in peripheral T lymphocytes after FOXP3 [GeneID=50943] loss of function (LOF).	3.257989 E-04	2.158964 E-03
	Genes up-regulated in response to hydrogen peroxide [PubChem=784] in CS-B cells (Cockayne syndrome fibroblast, CS) expressing ERCC6 [GeneID=2074] off a plasmid vector.	3.411222 E-04	8.641716 E-04
	Genes from the 254-gene classifier which were up-regulated in melanoma patients with a reported distant metastasis within 4 years.	4.187576 E-04	4.253314 E-06
	Cluster 5: genes progressively up-regulated (peak at 24 h time point) during differentiation of 3T3-L1 fibroblasts into adipocytes in response to adipogenic hormones.	6.362713 E-04	2.374238 E-03
	Cluster 4: genes maximally expressed at 16 h time point during differentiation of 3T3-L1 fibroblasts into adipocytes in response to adipogenic hormones.	6.851832 E-04	2.786804 E-04
	Genes in the red cluster of protein kinases distinguishing between luminal A and basal breast cancer subtypes.	7.695229 E-04	3.690388 E-05
	Up-regulated genes in the B lymphocyte developmental signature, based on expression profiling of lymphomas from the Emu-myc transgenic mice: the Pr E-BI stage.	8.217497 E-04	6.047912 E-04
	Genes with copy number gains in primary neuroblastoma tumors.	9.895612 E-04	3.329747 E-03
	Fibroblast serum response genes showing periodic expression during the cell cycle; excluded from the core serum response signature.	9.980253 E-04	2.842517 E-06
	Genes commonly up-regulated in undifferentiated cancer relative to well-differentiated cancer, based on the meta-analysis of the OncoMine gene expression database.	1.001585 E-03	8.641716 E-04
	Genes up-regulated in differentiating C2C12 cells (myoblasts) upon expression of PPARGC1A [GeneID=10891] off an adenoviral vector.	1.053035 E-03	5.825930 E-03
	Gene up-regulated by CD40 [GeneID=958] signaling in Ramos cells (EBV negative Burkitt lymphoma).	1.151607 E-03	3.059131 E-05
	Early-late response genes: differentially expressed in the first 3 h and after 12 h following UV-C irradiation of MEF cells (embryonic fibroblast).	1.172041 E-03	2.172876 E-03
	Up-regulated genes that vary between HNSCC (head and neck squamous cell carcinoma) groups formed on the basis of their level of pathological differentiation: well vs poorly differentiated tumors.	1.272816 E-03	5.154095 E-03
	DNA repair and replication genes up-regulated in melanoma patients who will relapse vs patients who will not.	1.432724 E-03	4.858986 E-05
	Genes up-regulated in neural stem cells (NSC) at both 36 h and 60 h after cr E-lox knockout of TLX (NR2E1) [GeneID=7101].	1.524366 E-03	1.079430 E-04
	Genes up-regulated in genomically unstable Ewing's sarcoma tumors compared to the stable ones.	1.566008 E-03	8.548234 E-06
	Genes down-regulated in erythroid progenitor cells from fetal livers of E13.5 embryos with KLF1 [GeneID=10661] knockout compared to those from the wild type embryos.	1.687763 E-03	6.243537 E-07
	Genes commonly down-regulated in SK-N-BE cells (neuroblastoma) after RNAi knockdown of CCND1 and CDK4 [GeneID=595;1019].	1.931956 E-03	1.565093 E-04
	Genes up-regulated specifically in human thymus.	2.133239 E-03	1.117495 E-04
	Genes down-regulated in MCF-7 cells (breast cancer) by selective estrogen receptor modulators (SERM) 4-hydroxytamoxifen, raloxifene, or ICI 182780 but not by estradiol [PubChem=44959;5035;3478439;5757].	2.314428 E-03	6.319492 E-03
	Genes down-regulated in quiescent vs dividing CD34+ [GeneID=8842] cells isolated from peripheral blood of normal donors.	2.327975 E-03	1.079430 E-04
	Up-regulated genes highly correlated with acute lymphoblastic leukemia (ALL) vs acute myeloid leukemia (AML).	2.390474 E-03	3.301052 E-03
	Genes showing cell-cycle stag E-specific expression [PMID=12058064].	2.741462 E-03	3.355612 E-06
	Cluster T7 of genes with similar expression profiles in thymic T lymphocytes after FOXP3 [GeneID=50943] loss of function (LOF).	2.787655 E-03	8.958837 E-03
	Proteins shown to interact with LCA5 [GeneID=167691] in vivo.	3.137672 E-03	4.754354 E-03
	Genes up-regulated by adenoviral expression of c-MYC [GeneID=4609] in HUVEC cells (umbilical vein endothelium).	3.404626 E-03	8.642769 E-03
	Genes up-regulated in transformed NIH3T3 cells (fibroblasts transformed by activated KRAS [GeneID=3845]) vs normal cells.	3.659280 E-03	8.943813 E-03
	Genes whose promoters were bound by E2F1 and E2F4 [GeneID=1869;1874] in the primary fibroblasts WI-38, by ChIP on chip assay.	4.089273 E-03	9.673271 E-04
	Genes specific to LEC (lymphatic endothelium cells) induced in BEC (blood endothelium cells) by expression of PROX1 [GeneID=5629] off adenovirus vector.	4.594702 E-03	9.048871 E-04
	Genes down-regulated in P493-6 cells (B lymphocyte, Burkitt's lymphoma model) upon knockdown of TFRC [GeneID=7037] by RNAi.	4.636466 E-03	6.885013 E-04
	Putative E2F4 [GeneID=1874] target genes identified as mitotic genes down-regulated in the LNCaP C4-2 cells (prostate cancer) at both 6 and 24 h following irradiation.	4.641419 E-03	1.492459 E-03
	Genes down-regulated in RS4;11 cells (MLL, mixed lineage leukemia) in response to SB216763 [PubChemID=176158], an inhibitor of GSK3B [GeneID=2932].	4.679190 E-03	1.300071 E-04
	Genes up-regulated in CD4+ [GeneID=920] T lymphocytes after stimulation with prostaglandin E2 [PubChem=5280360].	4.845614 E-03	2.867260 E-04
	Genes up-regulated after knockdown of RALA or RALB [GeneiD=5898;5899], which were also differentially expressed in bladder cancer compared to normal bladder urothelium tissue.	4.950676 E-03	4.496468 E-03
	Strongly up-regulated at 16-24 h during differentiation of 3T3-L1 cells (fibroblast) into adipocytes.	5.100765 E-03	1.487635 E-04
	Cellular genes up-regulated in forskin fibroblasts by expression of CMV EI86 protein off an adenovirus vector.	5.304006 E-03	1.086561 E-03
	Genes whose promoters were bound by HOXC6 [GeneID=3223] in LNCaP cells (prostate cancer) and which were up-regulated in comparison of tumor vs normal prostate tissue samples.	5.652166 E-03	8.925146 E-03
	Cell cycle genes significantly (p =&lt; 0.05) changed in fibroblast cells at 6 h after exposure to ionizing radiation.	5.687309 E-03	2.920513 E-03
	Selected genes down-regulated in response to the Ras inhibitor salirasib [PubChem=5469318] in a panel of cancer cell lines with constantly active HRAS [GeneID=3265].	5.854592 E-03	2.286326 E-06
	Genes down-regulated in APL (acute promyeolocytic leukemia) blasts expressing PML-RARA fusion [GeneID=5371;5914] compared to normal promyeloblasts.	5.907586 E-03	1.886123 E-05
	Cell proliferation genes up-regulated by histone deacetylase (HDAC) inhibitors SAHA and depsipeptide [PubChem=5311;5352062].	6.535379 E-03	3.123840 E-03
	Genes identified by method 2 as coordinately down-regulated late in HMEC cells (mammary epithelium) during acinar development in vitro.	7.185912 E-03	9.346174 E-05
	Genes whose promoters contain E-box motifs and whose expression changed in MYCN-3 cells (neuroblastoma) upon induction of MYCN [GeneID=4613].	7.466910 E-03	1.053006 E-06
	Genes up-regulated in cancer stem cells isolated from mammary tumors compared to the non-tumorigenic cells.	7.545858 E-03	1.399998 E-04
	Genes down-regulated in BJUB cells (B-lymphoma) in response to rapamycin [PubChem=6610346] treatment.	8.130691 E-03	3.909132 E-03
	Genes up-regulated in MEF cells (embryonic fibroblast) after expression of E2F1 or E2F2 [GeneID=1869;1870].	8.530993 E-03	4.272275 E-04
	Genes down-regulated in the A673 cells (Ewing sarcoma) after double knockdown of both FLI1 and DAX1 [GeneID=2313;190] by RNAi.	8.541244 E-03	1.591361 E-03
	Genes up-regulated in MCF10A cells (breast cancer) grown at low (mesenchymal phenotype) compared to those grown at high (epithelial, basal-like phenotype) confluency.	8.624574 E-03	8.631446 E-05
	Genes with promoters bound by FOXP3 [GeneID=50943] in unstimulated hybridoma cells.	8.784718 E-03	4.681149 E-03
	Genes up-regulated in senescent IMR90 cells (fibroblast) after knockdown of RB1 [GeneID=5925] by RNAi.	8.957482 E-03	1.482436 E-03
	Genes up-regulated in MCF7 cells (breast cancer) at 6 h of estradiol [PubChemID=5757] treatment.	9.542156 E-03	3.978441 E-05
MSigDB Predicted Promoter Motifs"
	Motif RCGCANGCGY matches NRF1: nuclear respiratory factor 1	4.559235 E-85	4.230702 E-03
	Motif NCACGTGN (no known TF)	2.903349 E-04	3.100337 E-03
	Motif SGCGSSAAA matches E2F1: E2F transcription factor 1&lt;br&gt; TFDP1: transcription factor Dp-1&lt;br&gt; RB1: retinoblastoma 1 (including osteosarcoma)	8.436832 E-04	5.390432 E-04
	Motif TTTSGCGS matches E2F1: E2F transcription factor 1	4.049809 E-03	4.031415 E-05
InterPro
	Mini-chromosome maintenance, conserved site	0.0002305590	1.492459 E-03
	Cdc37	0.0003009600	1.895811 E-03
	Cdc37, Hsp90 binding	0.0003009600	1.895811 E-03
	MCM N-terminal domain	0.0003137766	2.527339 E-03
	CDC6, C-terminal domain	0.0003912389	1.895811 E-03
	Myosin-like IQ motif-containing domain	0.0006470923	5.402192 E-03
	Immunoglobulin C1-set	0.0007383513	3.331751 E-04
	MHC classes I/II-like antigen recognition protein	0.0007678705	2.316914 E-04
	Rubredoxin-type fold	0.0013338780	5.522644 E-03
	Mini-chromosome maintenance, DNA-dependent ATPase	0.0013643140	5.680929 E-03
	MHC class I-like antigen recognition	0.0020421070	5.237587 E-05
	Nucleic acid-binding, OB-fold	0.0033974020	2.209969 E-03
	Heat shock protein Hsp90, conserved site	0.0057362290	5.522644 E-03
	HELP	0.0064811280	1.492459 E-03
	Galactose oxidase/kelch, beta-propeller	0.0067429540	7.854952 E-03
	DNA recombination and repair protein Rad51, C-terminal	0.0086577330	3.913264 E-03
	DNA recombination/repair protein RecA-like, ATP-binding domain	0.0086577330	3.913264 E-03
	Peptidase T2, asparaginase 2	0.0087933620	5.522644 E-03
TreeFam
	CD1A, CD1B, CD1C, CD1D, CD1E	0.0001262395	1.550653 E-07
	Cell division cycle 37	0.0003009600	1.895811 E-03
	ANKRD34A, ANKRD34B	0.0015723750	1.895811 E-03
	HSP90AA1, HSP90AB1	0.0034676930	1.895811 E-03
	EML1, EML2, EML3, EML4, EML5, ...	0.0064811280	1.492459 E-03
